# Supplementary material for: Differentiation and Regulation of Bovine Th2 Cells In Vitro
Source: Cells. 2024 Apr 24;13(9):738. doi: 10.3390/cells13090738 (PMC11083891; doi:10.3390/cells13090738)
Supplement: Supplementary file 1 [file cells-13-00738-s001.zip › Supplementary Tables.xlsx]

## Sheet: Suppl. Table S1
Accession	Description
Q3MHM3	NDFIP2 protein (Fragment) OS=Bos taurus OX=9913 GN=NDFIP2 PE=2 SV=1
A0A0A8J2N9	Amino acid transporter OS=Bos taurus OX=9913 GN=ASCT2 PE=2 SV=1
A0A3Q1M023	Rac GTPase activating protein 1 OS=Bos taurus OX=9913 GN=RACGAP1 PE=4 SV=1
Q8MHP0	MHC class II antigen OS=Bos taurus OX=9913 GN=BoLA-DRB3 PE=4 SV=1
A0A3Q1MEG8	CD74 molecule OS=Bos taurus OX=9913 GN=CD74 PE=4 SV=1
Q30302	MHC class II BoLA-DR-alpha (Fragment) OS=Bos taurus OX=9913 PE=3 SV=1
A0A3Q1LPX4	3-hydroxy-3-methylglutaryl coenzyme A synthase OS=Bos taurus OX=9913 GN=HMGCS1 PE=1 SV=1
Q6J1J1	Baculoviral IAP repeat-containing protein 5 OS=Bos taurus OX=9913 GN=BIRC5 PE=2 SV=2
F1MXK2	Nuclear FMR1 interacting protein 2 OS=Bos taurus OX=9913 GN=NUFIP2 PE=4 SV=2
Q3ZBC2	Succinate dehydrogenase assembly factor 2, mitochondrial OS=Bos taurus OX=9913 GN=SDHAF2 PE=2 SV=1
A0A3Q1LX60	Synaptopodin OS=Bos taurus OX=9913 GN=SYNPO PE=4 SV=1
Q9TVC8	BoLa class II histocompatibility antigen, DQB*0101 beta chain OS=Bos taurus OX=9913 GN=BoLA-DQB PE=2 SV=1
A0A3Q1N557	ADP ribosylation factor interacting protein 1 OS=Bos taurus OX=9913 GN=ARFIP1 PE=4 SV=1
A0A3Q1LN34	Uncharacterized protein OS=Bos taurus OX=9913 GN=DIAPH2 PE=4 SV=1
A0A3Q1MQ59	Solute carrier family 3 member 2 OS=Bos taurus OX=9913 GN=SLC3A2 PE=1 SV=1
Q0VCD7	FDPS protein (Fragment) OS=Bos taurus OX=9913 GN=FDPS PE=2 SV=1
A2VDV6	Sphingosine-1-phosphate receptor 2 OS=Bos taurus OX=9913 GN=S1PR2 PE=2 SV=1
Q0P5A5	Cyclin-dependent kinases regulatory subunit 1 OS=Bos taurus OX=9913 GN=CKS1B PE=3 SV=1
E1BF88	Interferon regulatory factor 4 OS=Bos taurus OX=9913 GN=IRF4 PE=4 SV=2
A5D7N6	Kinesin-like protein OS=Bos taurus OX=9913 GN=KIF23 PE=2 SV=1
F1MTX9	Solute carrier family 38 member 1 OS=Bos taurus OX=9913 GN=SLC38A1 PE=4 SV=3
Q0VBZ5	Transcription factor jun-B OS=Bos taurus OX=9913 GN=JUNB PE=2 SV=1
A0A3Q1NNJ6	Kinesin-like protein OS=Bos taurus OX=9913 GN=KIFC3 PE=3 SV=1
G3MWN1	Arginase-2, mitochondrial OS=Bos taurus OX=9913 GN=ARG2 PE=3 SV=1
F6QQ96	NEDD8 ultimate buster 1 OS=Bos taurus OX=9913 GN=NUB1 PE=4 SV=1
A0A3Q1NBA4	Uncharacterized protein OS=Bos taurus OX=9913 GN=FLVCR1 PE=4 SV=1
Q08DQ9	DLG associated protein 5 OS=Bos taurus OX=9913 GN=DLGAP5 PE=2 SV=1
A0A3Q1LXL8	Metaxin-1 OS=Bos taurus OX=9913 GN=MTX1 PE=4 SV=1
O77788	Neurofilament medium polypeptide OS=Bos taurus OX=9913 GN=NEFM PE=1 SV=3
Q8HYW2	Solute carrier organic anion transporter family member 3A1 OS=Bos taurus OX=9913 GN=SLCO3A1 PE=2 SV=1
F1MPZ9	NCK associated protein 1 OS=Bos taurus OX=9913 GN=NCKAP1 PE=4 SV=3
E1BIG6	Transferrin receptor OS=Bos taurus OX=9913 GN=TFRC PE=4 SV=3
Q9TU26	Blood-brain barrier large neutral amino acid transporter OS=Bos taurus OX=9913 GN=SLC7A5 PE=2 SV=1
A9QXB7	Interferon gamma OS=Bos taurus OX=9913 PE=2 SV=1
A7E320	E3 ubiquitin-protein ligase UHRF1 OS=Bos taurus OX=9913 GN=UHRF1 PE=2 SV=1
F1MQ84	Phosphodiesterase 4D interacting protein OS=Bos taurus OX=9913 GN=PDE4DIP PE=4 SV=3
F1MW01	Extra spindle pole bodies like 1, separase OS=Bos taurus OX=9913 GN=ESPL1 PE=4 SV=2
A0A452DI04	Transgelin OS=Bos taurus OX=9913 GN=TAGLN3 PE=3 SV=1
F1MYW0	5'-nucleotidase domain containing 3 OS=Bos taurus OX=9913 GN=NT5DC3 PE=4 SV=2
A6H7B3	NUF2 component of NDC80 kinetochore complex OS=Bos taurus OX=9913 GN=NUF2 PE=2 SV=1
Q1LZ95	Isopentenyl-diphosphate Delta-isomerase 1 OS=Bos taurus OX=9913 GN=IDI1 PE=2 SV=2
Q9TVC4	Leukocyte antigen OS=Bos taurus OX=9913 GN=BoLA-DRB3 PE=2 SV=1
Q2KHW2	CD83 molecule OS=Bos taurus OX=9913 GN=CD83 PE=2 SV=1
E1BME6	Hexokinase 2 OS=Bos taurus OX=9913 GN=HK2 PE=3 SV=3
Q17QJ0	Histone chaperone ASF1B OS=Bos taurus OX=9913 GN=ASF1B PE=2 SV=1
Q3SZ18	Hypoxanthine-guanine phosphoribosyltransferase OS=Bos taurus OX=9913 GN=HPRT1 PE=2 SV=3
Q32PA5	Ubiquitin-conjugating enzyme E2 C OS=Bos taurus OX=9913 GN=UBE2C PE=2 SV=1
O46414	Ferritin heavy chain OS=Bos taurus OX=9913 GN=FTH1 PE=2 SV=3
A4FUD9	DNA replication licensing factor MCM3 OS=Bos taurus OX=9913 GN=MCM3 PE=2 SV=1
P48734	Cyclin-dependent kinase 1 OS=Bos taurus OX=9913 GN=CDK1 PE=2 SV=2
Q1LZB6	Caprin-1 OS=Bos taurus OX=9913 GN=CAPRIN1 PE=2 SV=1
A0A3Q1LN49	Cyclin dependent kinase 17 OS=Bos taurus OX=9913 GN=CDK17 PE=4 SV=1
B3STV1	Chromodomain Y like 2 OS=Bos taurus OX=9913 GN=CDYL2 PE=2 SV=1
Q29RT6	Kinesin-like protein KIF20A OS=Bos taurus OX=9913 GN=KIF20A PE=2 SV=1
F1MDU7	DNA topoisomerase 2 OS=Bos taurus OX=9913 GN=TOP2A PE=3 SV=3
P37980	Inorganic pyrophosphatase OS=Bos taurus OX=9913 GN=PPA1 PE=1 SV=2
F6Q9E6	RWD domain containing 4 OS=Bos taurus OX=9913 GN=RWDD4 PE=4 SV=1
Q9XSA7	Chloride intracellular channel protein 4 OS=Bos taurus OX=9913 GN=CLIC4 PE=2 SV=3
F1MGX8	Protein Spindly OS=Bos taurus OX=9913 GN=SPDL1 PE=3 SV=1
Q1ADE7	Voltage-dependent P/Q-type calcium channel subunit alpha OS=Bos taurus OX=9913 GN=CACNA1A PE=2 SV=1
E1BC42	DNA replication complex GINS protein PSF2 OS=Bos taurus OX=9913 GN=GINS2 PE=3 SV=1
E1BMZ9	Structural maintenance of chromosomes protein OS=Bos taurus OX=9913 GN=SMC4 PE=3 SV=2
Q0P5C2	Bifunctional methylenetetrahydrofolate dehydrogenase/cyclohydrolase, mitochondrial OS=Bos taurus OX=9913 GN=MTHFD2 PE=2 SV=1
Q3ZC83	Solute carrier family 29 (Nucleoside transporters), member 1 OS=Bos taurus OX=9913 GN=SLC29A1 PE=1 SV=1
A6QQX0	PBK protein OS=Bos taurus OX=9913 GN=PBK PE=2 SV=1
F1MTU0	DNA replication and sister chromatid cohesion 1 OS=Bos taurus OX=9913 GN=DSCC1 PE=4 SV=3
Q76LV1	Heat shock protein HSP 90-beta OS=Bos taurus OX=9913 GN=HSP90AB1 PE=2 SV=3
A5D7R8	Thymidine kinase, cytosolic OS=Bos taurus OX=9913 GN=TK1 PE=2 SV=1
P27674	Solute carrier family 2, facilitated glucose transporter member 1 OS=Bos taurus OX=9913 GN=SLC2A1 PE=1 SV=1
E1BJZ4	GRIP and coiled-coil domain containing 1 OS=Bos taurus OX=9913 GN=GCC1 PE=4 SV=1
A0A3Q1N2V4	DNA (cytosine-5)-methyltransferase OS=Bos taurus OX=9913 GN=DNMT1 PE=3 SV=1
A0A3Q1MRT6	FXYD domain-containing ion transport regulator OS=Bos taurus OX=9913 GN=FXYD5 PE=3 SV=1
F1N506	DNA helicase OS=Bos taurus OX=9913 GN=MCM2 PE=1 SV=3
Q2KIC1	UDP-N-acteylglucosamine pyrophosphorylase 1 OS=Bos taurus OX=9913 GN=UAP1 PE=2 SV=1
A0A3Q1MJD6	Targeting protein for Xklp2 OS=Bos taurus OX=9913 GN=TPX2 PE=4 SV=1
G1K192	ADP-ribosylation factor-like protein 3 OS=Bos taurus OX=9913 GN=ARL3 PE=3 SV=3
P25930	C-X-C chemokine receptor type 4 OS=Bos taurus OX=9913 GN=CXCR4 PE=2 SV=1
A2VDW3	X-ray repair complementing defective repair in Chinese hamster cells 4 OS=Bos taurus OX=9913 GN=XRCC4 PE=2 SV=1
P29702	Protein farnesyltransferase/geranylgeranyltransferase type-1 subunit alpha OS=Bos taurus OX=9913 GN=FNTA PE=2 SV=2
A0A452DJD3	28S ribosomal protein S31, mitochondrial OS=Bos taurus OX=9913 GN=MRPS31 PE=4 SV=1
Q3SYV6	Importin subunit alpha OS=Bos taurus OX=9913 GN=KPNA2 PE=1 SV=1
Q3T0C6	Sodium/potassium-transporting ATPase subunit beta-3 OS=Bos taurus OX=9913 GN=ATP1B3 PE=2 SV=1
Q32LC7	Ras GTPase-activating protein-binding protein 1 OS=Bos taurus OX=9913 GN=G3BP1 PE=2 SV=1
Q17QG2	Nuclear migration protein nudC OS=Bos taurus OX=9913 GN=NUDC PE=2 SV=1
Q0VCX5	Eukaryotic peptide chain release factor subunit 1 OS=Bos taurus OX=9913 GN=ETF1 PE=2 SV=3
Q9N2J2	Phospholipid hydroperoxide glutathione peroxidase OS=Bos taurus OX=9913 GN=GPX4 PE=2 SV=2
G3N2V5	HATPase_c domain-containing protein OS=Bos taurus OX=9913 PE=4 SV=2
F1MK07	60S ribosomal protein L22-like 1 OS=Bos taurus OX=9913 GN=RPL22L1 PE=4 SV=1
E1BIA7	Clustered mitochondria protein homolog OS=Bos taurus OX=9913 GN=CLUH PE=3 SV=3
A4IFM5	CDCA8 protein OS=Bos taurus OX=9913 GN=CDCA8 PE=2 SV=1
Q3ZBV8	Threonine--tRNA ligase 1, cytoplasmic OS=Bos taurus OX=9913 GN=TARS1 PE=2 SV=1
A6H7D7	BZW2 protein OS=Bos taurus OX=9913 GN=BZW2 PE=2 SV=1
A0A3Q1N4A7	Citron Rho-interacting kinase OS=Bos taurus OX=9913 GN=CIT PE=3 SV=1
F1MUQ7	Spindle and kinetochore-associated protein 2 OS=Bos taurus OX=9913 GN=SKA2 PE=4 SV=1
A0A3Q1ND27	NLR family CARD domain containing 3 OS=Bos taurus OX=9913 GN=NLRC3 PE=4 SV=1
Q6IE76	FDFT1 protein OS=Bos taurus OX=9913 GN=FDFT1 PE=2 SV=1
Q3ZBH9	DNA replication licensing factor MCM7 OS=Bos taurus OX=9913 GN=MCM7 PE=2 SV=1
A0A3Q1LTU7	Uncharacterized protein OS=Bos taurus OX=9913 GN=LOC618737 PE=4 SV=1
A6QNM3	Origin recognition complex subunit 2 OS=Bos taurus OX=9913 GN=ORC2 PE=2 SV=2
E1BH89	DNA helicase OS=Bos taurus OX=9913 GN=MCM6 PE=3 SV=3
Q5E9B2	PCNA-associated factor OS=Bos taurus OX=9913 GN=PCLAF PE=3 SV=1
A0A3Q1N7N8	Uncharacterized protein OS=Bos taurus OX=9913 GN=RRP7A PE=4 SV=1
Q3ZBW4	Proliferating cell nuclear antigen OS=Bos taurus OX=9913 GN=PCNA PE=2 SV=1
Q5E954	DnaJ homolog subfamily A member 1 OS=Bos taurus OX=9913 GN=DNAJA1 PE=2 SV=2
E1BM34	Anaphase promoting complex subunit 7 OS=Bos taurus OX=9913 GN=ANAPC7 PE=4 SV=3
A3KN39	NCAPG protein OS=Bos taurus OX=9913 GN=NCAPG PE=2 SV=1
Q17QE0	Uncharacterized protein FAM241A OS=Bos taurus OX=9913 GN=FAM241A PE=2 SV=1
Q0VCZ3	YTH domain-containing family protein 2 OS=Bos taurus OX=9913 GN=YTHDF2 PE=2 SV=1
A6QPE8	Kinesin-like protein OS=Bos taurus OX=9913 GN=KIF2C PE=2 SV=1
A0A3Q1NBQ9	Tetraspanin OS=Bos taurus OX=9913 GN=CD82 PE=1 SV=1
F1MY62	GB1/RHD3-type G domain-containing protein OS=Bos taurus OX=9913 GN=LOC511531 PE=4 SV=3
A0A3Q1LQU5	FA complementation group I OS=Bos taurus OX=9913 GN=FANCI PE=4 SV=1
Q7YRC6	Aurora kinase B OS=Bos taurus OX=9913 GN=AURKB PE=2 SV=1
O41515	Microtubule-associated proteins 1A/1B light chain 3B OS=Bos taurus OX=9913 GN=MAP1LC3B PE=1 SV=4
A0A3Q1MCW9	T-cell receptor-associated transmembrane adapter 1 OS=Bos taurus OX=9913 GN=TRAT1 PE=4 SV=1
A0A3Q1LUT2	Eukaryotic translation initiation factor 4 gamma 1 OS=Bos taurus OX=9913 GN=EIF4G1 PE=1 SV=1
A0A3Q1LZ55	Acyl-CoA synthetase long chain family member 4 OS=Bos taurus OX=9913 GN=ACSL4 PE=4 SV=1
A0A3Q1M537	Chromosome 10 C15orf48 homolog OS=Bos taurus OX=9913 GN=C10H15orf48 PE=4 SV=1
A0A3Q1LPW5	Kinesin-like protein OS=Bos taurus OX=9913 GN=KIF22 PE=3 SV=1
F1MY46	RNA binding motif protein 23 OS=Bos taurus OX=9913 GN=RBM23 PE=4 SV=1
Q01061	Calcium/calmodulin-dependent 3',5'-cyclic nucleotide phosphodiesterase 1B OS=Bos taurus OX=9913 GN=PDE1B PE=1 SV=1
A5D9A8	Squalene epoxidase OS=Bos taurus OX=9913 GN=SQLE PE=2 SV=1
F1MY63	Thymidylate synthase OS=Bos taurus OX=9913 GN=TYMS PE=3 SV=1
E1BGY1	Family with sequence similarity 111 member B OS=Bos taurus OX=9913 GN=FAM111B PE=4 SV=2
Q3T0Q4	Nucleoside diphosphate kinase B OS=Bos taurus OX=9913 GN=NME2 PE=1 SV=1
A5D7A2	GARS protein OS=Bos taurus OX=9913 GN=GARS1 PE=1 SV=1
A7E3T7	S-adenosylmethionine synthase OS=Bos taurus OX=9913 GN=MAT2A PE=1 SV=1
E1BPD7	Marker of proliferation Ki-67 OS=Bos taurus OX=9913 GN=MKI67 PE=4 SV=2
F6QHI8	Uncharacterized protein OS=Bos taurus OX=9913 GN=DDX21 PE=1 SV=1
F1MSF1	Ribonucleoside-diphosphate reductase OS=Bos taurus OX=9913 GN=RRM1 PE=3 SV=2
Q2NKU1	Deoxyuridine triphosphatase OS=Bos taurus OX=9913 GN=DUT PE=2 SV=1
A0A3Q1LH01	RNA helicase OS=Bos taurus OX=9913 GN=DDX55 PE=3 SV=1
Q5E9Y0	Cyclin-dependent kinase 2 OS=Bos taurus OX=9913 GN=CDK2 PE=2 SV=1
G3MZ54	Sorting nexin OS=Bos taurus OX=9913 GN=SNX9 PE=3 SV=2
A0A3Q1NBN7	C-type lectin domain-containing protein OS=Bos taurus OX=9913 GN=CLEC2B PE=4 SV=1
A5PK33	GZMA protein OS=Bos taurus OX=9913 GN=GZMA PE=2 SV=1
Q2KHU0	Phosphoserine phosphatase OS=Bos taurus OX=9913 GN=PSPH PE=2 SV=1
A0A3Q1LSK6	Uncharacterized protein OS=Bos taurus OX=9913 GN=ABCB1 PE=4 SV=1
F1MVT7	EPM2A interacting protein 1 OS=Bos taurus OX=9913 GN=EPM2AIP1 PE=4 SV=2
F1N1I1	GB1/RHD3-type G domain-containing protein OS=Bos taurus OX=9913 GN=LOC513659 PE=4 SV=3
A4IF91	Cell proliferation regulating inhibitor of protein phosphatase 2A OS=Bos taurus OX=9913 GN=CIP2A PE=2 SV=1
F1MEW4	Cystathionine beta-synthase OS=Bos taurus OX=9913 GN=CBS PE=3 SV=1
Q3ZBI3	Ribonuclease H2 subunit B OS=Bos taurus OX=9913 GN=RNASEH2B PE=2 SV=2
E1B9F6	Elongation factor 1-alpha OS=Bos taurus OX=9913 PE=3 SV=3
Q3T168	Calcyclin-binding protein OS=Bos taurus OX=9913 GN=CACYBP PE=2 SV=1
Q32P59	SRA stem-loop-interacting RNA-binding protein, mitochondrial OS=Bos taurus OX=9913 GN=SLIRP PE=3 SV=1
A0A3Q1MD85	LDL receptor related protein associated protein 1 OS=Bos taurus OX=9913 GN=LRPAP1 PE=1 SV=1
E1BFZ9	DNA helicase OS=Bos taurus OX=9913 GN=MCM4 PE=3 SV=3
A6QL93	TACC3 protein OS=Bos taurus OX=9913 GN=TACC3 PE=2 SV=1
Q32LD6	Eukaryotic translation initiation factor 5B OS=Bos taurus OX=9913 GN=EIF5B PE=2 SV=1
A6H767	Nucleosome assembly protein 1-like 1 OS=Bos taurus OX=9913 GN=NAP1L1 PE=2 SV=1
E1BN25	Bromodomain adjacent to zinc finger domain 1A OS=Bos taurus OX=9913 GN=BAZ1A PE=4 SV=3
Q3SYS9	KIF-binding protein OS=Bos taurus OX=9913 GN=KIFBP PE=2 SV=1
A7Z061	Cell division cycle protein 27 homolog OS=Bos taurus OX=9913 GN=CDC27 PE=2 SV=1
Q32LK2	Cysteine-rich and transmembrane domain-containing protein 1 OS=Bos taurus OX=9913 GN=CYSTM1 PE=3 SV=1
Q0P5N5	GrpE protein homolog 2, mitochondrial OS=Bos taurus OX=9913 GN=GRPEL2 PE=2 SV=1
A0A3Q1LQI5	Eukaryotic translation initiation factor 2 subunit 2 OS=Bos taurus OX=9913 GN=EIF2S2 PE=4 SV=1
A1L530	Solute carrier family 5 (Sodium-dependent vitamin transporter), member 6 OS=Bos taurus OX=9913 GN=SLC5A6 PE=2 SV=1
Q71SP7	Fatty acid synthase OS=Bos taurus OX=9913 GN=FASN PE=2 SV=1
F1MN04	Uncharacterized protein OS=Bos taurus OX=9913 GN=PAICS PE=3 SV=3
A0A3Q1M792	SUZ12 polycomb repressive complex 2 subunit OS=Bos taurus OX=9913 GN=SUZ12 PE=4 SV=1
A0A3Q1NK84	YTH N6-methyladenosine RNA binding protein 3 OS=Bos taurus OX=9913 GN=YTHDF3 PE=4 SV=1
Q3SZ54	Eukaryotic initiation factor 4A-I OS=Bos taurus OX=9913 GN=EIF4A1 PE=2 SV=1
A0A3Q1MHZ1	GB1/RHD3-type G domain-containing protein OS=Bos taurus OX=9913 GN=LOC512486 PE=4 SV=1
A6QR28	Phosphoserine aminotransferase OS=Bos taurus OX=9913 GN=PSAT1 PE=2 SV=1
A6QPX8	RAB12 protein OS=Bos taurus OX=9913 GN=RAB12 PE=2 SV=1
Q0VCK2	cAMP-dependent protein kinase inhibitor OS=Bos taurus OX=9913 GN=PKIB PE=2 SV=1
E1BG87	HAUS augmin like complex subunit 6 OS=Bos taurus OX=9913 GN=HAUS6 PE=4 SV=3
Q5E9X4	Leucine-rich repeat-containing protein 59 OS=Bos taurus OX=9913 GN=LRRC59 PE=2 SV=1
A0A3Q1NH28	OTU deubiquitinase with linear linkage specificity OS=Bos taurus OX=9913 GN=OTULIN PE=4 SV=1
Q2YDG3	Cell division cycle protein 123 homolog OS=Bos taurus OX=9913 GN=CDC123 PE=2 SV=1
A6QPN6	Gamma-interferon-inducible lysosomal thiol reductase OS=Bos taurus OX=9913 GN=IFI30 PE=2 SV=1
F1MAW0	Gem nuclear organelle associated protein 4 OS=Bos taurus OX=9913 GN=GEMIN4 PE=4 SV=3
Q3SWY3	Inosine-5'-monophosphate dehydrogenase 2 OS=Bos taurus OX=9913 GN=IMPDH2 PE=2 SV=1
A1L505	Ubiquitin associated protein 2-like OS=Bos taurus OX=9913 GN=UBAP2L PE=2 SV=1
A0A3Q1MUI5	Serine/threonine kinase 3 OS=Bos taurus OX=9913 GN=STK3 PE=4 SV=1
A0A3Q1MSK4	Enhancer of zeste 2 polycomb repressive complex 2 subunit OS=Bos taurus OX=9913 GN=EZH2 PE=4 SV=1
Q4PJW3	Lanosterol 14-alpha demethylase OS=Bos taurus OX=9913 GN=CYP51A1 PE=2 SV=1
G3N3D6	Phosphoinositide phospholipase C OS=Bos taurus OX=9913 GN=PLCH1 PE=4 SV=2
F1MXS4	DNA polymerase alpha subunit B OS=Bos taurus OX=9913 GN=POLA2 PE=3 SV=2
A0A3Q1MBP1	Hypoxia up-regulated 1 OS=Bos taurus OX=9913 GN=HYOU1 PE=1 SV=1
O97680	Thioredoxin OS=Bos taurus OX=9913 GN=TXN PE=3 SV=3
E1BB52	Cyclin-dependent kinase 13 OS=Bos taurus OX=9913 GN=CDK13 PE=3 SV=1
Q2KII6	Neuroguidin OS=Bos taurus OX=9913 GN=NGDN PE=2 SV=1
Q3ZBL9	Cyclin-H OS=Bos taurus OX=9913 GN=CCNH PE=2 SV=1
A0A3Q1MH07	Semaphorin-4A OS=Bos taurus OX=9913 GN=SEMA4A PE=3 SV=1
F1MYQ1	Thioredoxin domain-containing protein 9 OS=Bos taurus OX=9913 GN=TXNDC9 PE=4 SV=2
Q3T0N9	O-acyltransferase OS=Bos taurus OX=9913 GN=SOAT1 PE=2 SV=1
F1MSM4	Glycogenin 2 OS=Bos taurus OX=9913 GN=GYG2 PE=4 SV=3
Q862L7	Similar to elongation factor 1 alpha (Fragment) OS=Bos taurus OX=9913 PE=2 SV=1
P12624	Myristoylated alanine-rich C-kinase substrate OS=Bos taurus OX=9913 GN=MARCKS PE=1 SV=6
P11116	Galectin-1 OS=Bos taurus OX=9913 GN=LGALS1 PE=1 SV=2
E1BI58	Ribonucleotide reductase regulatory subunit M2 OS=Bos taurus OX=9913 GN=RRM2 PE=4 SV=3
Q95109	DQA protein OS=Bos taurus OX=9913 GN=DQA PE=2 SV=1
E1B738	SHC binding and spindle associated 1 OS=Bos taurus OX=9913 GN=SHCBP1 PE=4 SV=1
A0A3Q1LM83	Protein phosphatase 4 regulatory subunit 3B OS=Bos taurus OX=9913 GN=PPP4R3B PE=4 SV=1
Q3SZ60	THO complex subunit 7 homolog OS=Bos taurus OX=9913 GN=THOC7 PE=2 SV=1
Q3ZBU7	Tubulin beta-4A chain OS=Bos taurus OX=9913 GN=TUBB4A PE=2 SV=1
F1N3G4	Condensin complex subunit 1 OS=Bos taurus OX=9913 GN=NCAPD2 PE=3 SV=3
Q3T0Q8	U3 small nucleolar RNA-associated protein 14 homolog A OS=Bos taurus OX=9913 GN=UTP14A PE=2 SV=1
O97919	C-C motif chemokine 5 OS=Bos taurus OX=9913 GN=CCL5 PE=3 SV=2
Q3SZK4	FAST kinase domain-containing protein 4 OS=Bos taurus OX=9913 GN=TBRG4 PE=2 SV=1
Q58DA3	Ly1 antibody reactive OS=Bos taurus OX=9913 GN=LYAR PE=2 SV=1
Q2HJD4	CSTF2 protein OS=Bos taurus OX=9913 GN=CSTF2T PE=2 SV=1
A0A140T8C7	Origin recognition complex subunit 1 OS=Bos taurus OX=9913 GN=ORC1 PE=3 SV=1
A0A3Q1M9H4	DNA methyltransferase 3 alpha OS=Bos taurus OX=9913 GN=DNMT3A PE=3 SV=1
A0A3Q1LP37	Ubiquitin-conjugating enzyme E2 S OS=Bos taurus OX=9913 GN=UBE2S PE=3 SV=1
F1N0F7	Eukaryotic translation initiation factor 5 OS=Bos taurus OX=9913 GN=EIF5 PE=4 SV=1
A5D7L5	Zinc transporter ZIP14 OS=Bos taurus OX=9913 GN=SLC39A14 PE=2 SV=1
Q2KI67	Ecdysoneless cell cycle regulator OS=Bos taurus OX=9913 GN=ECD PE=2 SV=1
G5E6N6	Uncharacterized protein OS=Bos taurus OX=9913 GN=ZCCHC9 PE=4 SV=2
P55859	Purine nucleoside phosphorylase OS=Bos taurus OX=9913 GN=PNP PE=1 SV=3
Q3ZCL3	N-myc-interactor OS=Bos taurus OX=9913 GN=NMI PE=2 SV=1
A7MB26	LARP4 protein OS=Bos taurus OX=9913 GN=LARP4 PE=2 SV=1
F1MQI4	Timeless circadian regulator OS=Bos taurus OX=9913 GN=TIMELESS PE=4 SV=2
F1MMQ8	Spectrin alpha, erythrocytic 1 OS=Bos taurus OX=9913 GN=SPTA1 PE=4 SV=3
Q3ZC67	Polyadenylate-binding protein-interacting protein 2 OS=Bos taurus OX=9913 GN=PAIP2 PE=2 SV=1
A0A3Q1MYQ9	TNF receptor superfamily member 1B OS=Bos taurus OX=9913 GN=TNFRSF1B PE=4 SV=1
Q1LZA3	Asparagine synthetase [glutamine-hydrolyzing] OS=Bos taurus OX=9913 GN=ASNS PE=2 SV=3
Q2KJA2	ATP-binding cassette sub-family F member 2 OS=Bos taurus OX=9913 GN=ABCF2 PE=2 SV=1
Q5E9B4	Translation initiation factor eIF-2B subunit beta OS=Bos taurus OX=9913 GN=EIF2B2 PE=2 SV=1
G3MY86	Ubiquitin-like domain-containing protein OS=Bos taurus OX=9913 GN=LOC107132247 PE=4 SV=1
P61286	Polyadenylate-binding protein 1 OS=Bos taurus OX=9913 GN=PABPC1 PE=2 SV=1
Q0V8H6	Putative helicase MOV-10 OS=Bos taurus OX=9913 GN=MOV10 PE=2 SV=1
Q6EWQ7	Eukaryotic translation initiation factor 5A-1 OS=Bos taurus OX=9913 GN=EIF5A PE=2 SV=3
E1BC24	Midasin OS=Bos taurus OX=9913 GN=MDN1 PE=3 SV=3
P80513	Mesencephalic astrocyte-derived neurotrophic factor OS=Bos taurus OX=9913 GN=MANF PE=1 SV=2
E1BMJ5	Patatin like phospholipase domain containing 6 OS=Bos taurus OX=9913 GN=PNPLA6 PE=4 SV=3
Q1JPA2	Eukaryotic translation elongation factor 1 gamma (Fragment) OS=Bos taurus OX=9913 GN=EEF1G PE=2 SV=1
Q0IIM3	Heat shock protein 105 kDa OS=Bos taurus OX=9913 GN=HSPH1 PE=2 SV=1
A0A3Q1N7U4	Uncharacterized protein OS=Bos taurus OX=9913 GN=ACOT7 PE=4 SV=1
P00376	Dihydrofolate reductase OS=Bos taurus OX=9913 GN=DHFR PE=1 SV=3
Q0P580	Histone acetyltransferase type B catalytic subunit OS=Bos taurus OX=9913 GN=HAT1 PE=2 SV=1
F1MW26	Collagenase 3 OS=Bos taurus OX=9913 GN=MMP13 PE=3 SV=2
A0A3Q1LV36	Importin 5 OS=Bos taurus OX=9913 GN=IPO5 PE=1 SV=1
Q58DN4	Protein phosphatase methylesterase 1 OS=Bos taurus OX=9913 GN=PPME1 PE=2 SV=3
E1BKN1	Ribosomal RNA processing 1B OS=Bos taurus OX=9913 GN=RRP1B PE=4 SV=3
F6K7J1	Complement regulatory protein variant 5 OS=Bos taurus OX=9913 GN=CD46 PE=2 SV=1
A6H7F8	DNA helicase OS=Bos taurus OX=9913 GN=MCM5 PE=2 SV=1
A0A3Q1N108	Leucyl-tRNA synthetase OS=Bos taurus OX=9913 GN=LARS1 PE=3 SV=1
Q5E983	Elongation factor 1-beta OS=Bos taurus OX=9913 GN=EEF1B PE=2 SV=3
Q58DH8	Flap endonuclease 1 OS=Bos taurus OX=9913 GN=FEN1 PE=2 SV=1
Q3ZCD0	CD81 antigen OS=Bos taurus OX=9913 GN=CD81 PE=2 SV=1
A0A3Q1NJQ0	Fatty acyl-CoA reductase OS=Bos taurus OX=9913 GN=FAR1 PE=3 SV=1
Q1RMT7	Serine/threonine-protein kinase RIO3 OS=Bos taurus OX=9913 GN=RIOK3 PE=2 SV=1
Q1LZF6	Acyl-CoA synthetase long-chain family member 5 OS=Bos taurus OX=9913 GN=ACSL5 PE=1 SV=1
Q3ZBL5	Peptidyl-tRNA hydrolase 2, mitochondrial OS=Bos taurus OX=9913 GN=PTRH2 PE=2 SV=1
E1BNH2	Cystathionine gamma-lyase OS=Bos taurus OX=9913 GN=CTH PE=3 SV=2
F1MLS2	Trio Rho guanine nucleotide exchange factor OS=Bos taurus OX=9913 GN=TRIO PE=4 SV=3
A0A452DJ54	Ubiquitin-related modifier 1 OS=Bos taurus OX=9913 GN=URM1 PE=3 SV=1
Q3SYZ5	DDX5 protein (Fragment) OS=Bos taurus OX=9913 GN=DDX5 PE=2 SV=1
Q2KIX0	Metallothionein OS=Bos taurus OX=9913 GN=MT2A PE=2 SV=1
E1BGH2	Kelch domain containing 4 OS=Bos taurus OX=9913 GN=KLHDC4 PE=4 SV=3
E1BLF7	NudC domain containing 1 OS=Bos taurus OX=9913 GN=NUDCD1 PE=4 SV=2
F6QID7	TGF-beta activated kinase 1 (MAP3K7) binding protein 1 OS=Bos taurus OX=9913 GN=TAB1 PE=4 SV=1
F1MQ42	Stem-loop binding protein OS=Bos taurus OX=9913 GN=SLBP PE=4 SV=1
Q05KJ0	BCL2-like 1 OS=Bos taurus OX=9913 GN=BCL2L1 PE=2 SV=1
Q3MHL7	T-complex protein 1 subunit zeta OS=Bos taurus OX=9913 GN=CCT6A PE=1 SV=3
Q0IIG0	Nucleolar and coiled-body phosphoprotein 1 OS=Bos taurus OX=9913 GN=NOLC1 PE=2 SV=1
A0A3Q1LZW1	Paralemmin 3 OS=Bos taurus OX=9913 GN=PALM3 PE=4 SV=1
A8YXZ8	Mitochondrial import receptor subunit TOM5 homolog OS=Bos taurus OX=9913 GN=TOMM5 PE=3 SV=1
Q3SZL8	Condensin-2 complex subunit H2 OS=Bos taurus OX=9913 GN=NCAPH2 PE=2 SV=1
A0A3Q1LZX6	L-selectin OS=Bos taurus OX=9913 GN=SELL PE=3 SV=1
A0A3Q1M5E5	Talin 2 OS=Bos taurus OX=9913 GN=TLN2 PE=4 SV=1
A5D7D4	GSPT1 protein OS=Bos taurus OX=9913 GN=GSPT1 PE=2 SV=1
A0A452DIR5	Elongation factor Ts, mitochondrial OS=Bos taurus OX=9913 GN=TSFM PE=3 SV=1
Q24K02	Insulin-degrading enzyme OS=Bos taurus OX=9913 GN=IDE PE=2 SV=1
A0A3Q1MG78	40S ribosomal protein S30 OS=Bos taurus OX=9913 PE=3 SV=1
H6V5F3	MHC class I antigen (Fragment) OS=Bos taurus OX=9913 GN=BoLA-N PE=3 SV=1
F1MZU1	La ribonucleoprotein domain family member 1 OS=Bos taurus OX=9913 GN=LARP1 PE=4 SV=3
Q3T0G3	AHA1, activator of heat shock 90kDa protein ATPase homolog 1 (Yeast) OS=Bos taurus OX=9913 GN=AHSA1 PE=2 SV=1
Q3ZBE9	Sterol-4-alpha-carboxylate 3-dehydrogenase, decarboxylating OS=Bos taurus OX=9913 GN=NSDHL PE=2 SV=1
Q3ZBX0	Basigin OS=Bos taurus OX=9913 GN=BSG PE=2 SV=1
A0A3Q1LIK1	Prostate tumor-overexpressed gene 1 protein homolog OS=Bos taurus OX=9913 GN=PTOV1 PE=4 SV=1
Q3T0K2	T-complex protein 1 subunit gamma OS=Bos taurus OX=9913 GN=CCT3 PE=1 SV=1
F1MMK8	Lysine--tRNA ligase OS=Bos taurus OX=9913 GN=KARS1 PE=1 SV=2
Q0VC53	Deoxyhypusine hydroxylase OS=Bos taurus OX=9913 GN=DOHH PE=1 SV=1
Q3SZ20	Serine hydroxymethyltransferase, mitochondrial OS=Bos taurus OX=9913 GN=SHMT2 PE=2 SV=1
Q3ZBF7	Prostaglandin E synthase 3 OS=Bos taurus OX=9913 GN=PTGES3 PE=1 SV=1
F1N3G2	NOP2 nucleolar protein OS=Bos taurus OX=9913 GN=NOP2 PE=3 SV=1
F1MV22	Amidophosphoribosyltransferase OS=Bos taurus OX=9913 GN=PPAT PE=3 SV=1
Q29RR1	Leucine-rich repeat-containing protein 41 OS=Bos taurus OX=9913 GN=LRRC41 PE=2 SV=1
Q3ZCI9	T-complex protein 1 subunit theta OS=Bos taurus OX=9913 GN=CCT8 PE=1 SV=3
Q0VCR7	Monofunctional C1-tetrahydrofolate synthase, mitochondrial OS=Bos taurus OX=9913 GN=MTHFD1L PE=2 SV=2
P55052	Fatty acid-binding protein 5 OS=Bos taurus OX=9913 GN=FABP5 PE=1 SV=4
A7MBB7	NFKB2 protein OS=Bos taurus OX=9913 GN=NFKB2 PE=2 SV=1
E1BKS1	Syndecan OS=Bos taurus OX=9913 GN=SDC4 PE=3 SV=1
F1N535	Non-SMC condensin II complex subunit G2 OS=Bos taurus OX=9913 GN=NCAPG2 PE=4 SV=1
A4IFC8	DNA ligase OS=Bos taurus OX=9913 GN=LIG1 PE=2 SV=1
A6QLA4	Methionine aminopeptidase 1 OS=Bos taurus OX=9913 GN=METAP1 PE=2 SV=1
A0A3Q1LFJ1	RAD18 E3 ubiquitin protein ligase OS=Bos taurus OX=9913 GN=RAD18 PE=4 SV=1
Q17QA1	C-C motif chemokine 4 OS=Bos taurus OX=9913 GN=CCL4 PE=3 SV=1
Q3SZY3	Securin OS=Bos taurus OX=9913 GN=PTTG1 PE=2 SV=1
A0A3Q1LUJ8	Sodium/potassium-transporting ATPase subunit alpha OS=Bos taurus OX=9913 GN=ATP1A1 PE=1 SV=1
Q0II43	Thioredoxin-like 1 OS=Bos taurus OX=9913 GN=TXNL1 PE=2 SV=1
E1BKY9	Coproporphyrinogen oxidase OS=Bos taurus OX=9913 GN=CPOX PE=1 SV=1
Q6EWQ6	Deoxyhypusine synthase OS=Bos taurus OX=9913 GN=DHPS PE=2 SV=2
A0A3Q1ND22	Adaptor protein, phosphotyrosine interacting with PH domain and leucine zipper 1 OS=Bos taurus OX=9913 GN=APPL1 PE=4 SV=1
A0A3Q1MRC2	Interferon gamma receptor 1 OS=Bos taurus OX=9913 GN=IFNGR1 PE=4 SV=1
E1BC41	Kinesin family member 15 OS=Bos taurus OX=9913 GN=KIF15 PE=3 SV=2
A0A3Q1N077	Proteasome activator subunit 3 OS=Bos taurus OX=9913 GN=PSME3 PE=4 SV=1
F1N412	Acetoacetyl-CoA synthetase OS=Bos taurus OX=9913 GN=AACS PE=4 SV=1
Q5E938	Eukaryotic translation initiation factor 1 OS=Bos taurus OX=9913 GN=EIF1 PE=3 SV=1
A0A452DI79	Translin OS=Bos taurus OX=9913 GN=TSN PE=4 SV=1
Q0V8D3	SH2 domain protein 2A (Fragment) OS=Bos taurus OX=9913 GN=SH2D2A PE=2 SV=1
G3N3V3	Zinc finger protein 281 OS=Bos taurus OX=9913 GN=ZNF281 PE=4 SV=2
A6QQC2	TNFRSF10A protein (Fragment) OS=Bos taurus OX=9913 GN=TNFRSF10A PE=2 SV=1
E1BK69	Uncharacterized protein OS=Bos taurus OX=9913 GN=UFSP2 PE=4 SV=1
F2Z4F5	Dipeptidyl peptidase 3 OS=Bos taurus OX=9913 GN=DPP3 PE=1 SV=2
Q3YJG5	MHC class I antigen (Fragment) OS=Bos taurus OX=9913 GN=BoLA PE=3 SV=1
V6F9B4	Protein phosphatase 2 (Formerly 2A), regulatory subunit A (PR 65), beta isoform-like OS=Bos taurus OX=9913 GN=PPP2R1B PE=4 SV=1
Q17QI3	Acetyl-CoA acetyltransferase 2 OS=Bos taurus OX=9913 GN=ACAT2 PE=1 SV=1
A0A3Q1M2L5	Phosphatidylinositol-4,5-bisphosphate 3-kinase catalytic subunit gamma OS=Bos taurus OX=9913 GN=PIK3CG PE=3 SV=1
F1MZV2	Charged multivesicular body protein 5 OS=Bos taurus OX=9913 GN=CHMP5 PE=4 SV=1
A0A3Q1MUC8	Kinesin-like protein OS=Bos taurus OX=9913 GN=KIFC1 PE=3 SV=1
F1N7I8	Zinc finger protein 593 OS=Bos taurus OX=9913 GN=ZNF593 PE=4 SV=2
Q3SYU2	Elongation factor 2 OS=Bos taurus OX=9913 GN=EEF2 PE=2 SV=3
F1MHM5	Tyrosine--tRNA ligase OS=Bos taurus OX=9913 GN=YARS1 PE=3 SV=1
Q2NKZ1	T-complex protein 1 subunit eta OS=Bos taurus OX=9913 GN=CCT7 PE=1 SV=1
Q9TRY0	Peptidyl-prolyl cis-trans isomerase FKBP4 OS=Bos taurus OX=9913 GN=FKBP4 PE=1 SV=4
F1MY28	BCL2 associated athanogene 6 OS=Bos taurus OX=9913 GN=BAG6 PE=4 SV=1
Q5E9N0	Bystin OS=Bos taurus OX=9913 GN=BYSL PE=2 SV=1
E1BMW6	T-box transcription factor 21 OS=Bos taurus OX=9913 GN=TBX21 PE=4 SV=1
Q32L67	Glutaredoxin-2, mitochondrial OS=Bos taurus OX=9913 GN=GLRX2 PE=2 SV=1
F1N647	Fatty acid synthase OS=Bos taurus OX=9913 GN=FASN PE=1 SV=3
G5E531	T-complex protein 1 subunit alpha OS=Bos taurus OX=9913 GN=TCP1 PE=3 SV=1
Q3SZB6	Transcription factor BTF3 OS=Bos taurus OX=9913 GN=BTF3 PE=2 SV=1
A0JNF4	DNA primase large subunit OS=Bos taurus OX=9913 GN=PRIM2 PE=2 SV=1
A0A3Q1LGZ8	Protein zwilch homolog OS=Bos taurus OX=9913 GN=ZWILCH PE=4 SV=1
E1BD59	E3 ubiquitin-protein ligase TRIM56 OS=Bos taurus OX=9913 GN=TRIM56 PE=2 SV=1
A0A3Q1M8K2	OTU deubiquitinase with linear linkage specificity like OS=Bos taurus OX=9913 GN=OTULINL PE=4 SV=1
Q0VCX2	Endoplasmic reticulum chaperone BiP OS=Bos taurus OX=9913 GN=HSPA5 PE=2 SV=1
F1MWD3	Chaperonin containing TCP1 subunit 5 OS=Bos taurus OX=9913 GN=CCT5 PE=1 SV=3
F1MY41	Structural maintenance of chromosomes protein OS=Bos taurus OX=9913 GN=SMC2 PE=3 SV=2
G5E631	DEAD-box helicase 3 X-linked OS=Bos taurus OX=9913 GN=DDX3X PE=1 SV=1
Q3SYZ4	Aspartate--tRNA ligase, cytoplasmic OS=Bos taurus OX=9913 GN=DARS1 PE=2 SV=1
Q0II27	LOC781710 protein (Fragment) OS=Bos taurus OX=9913 GN=LOC781710 PE=2 SV=1
Q0VC24	Ribosome biogenesis protein WDR12 OS=Bos taurus OX=9913 GN=WDR12 PE=2 SV=1
F6RBQ9	RNA binding motif protein 3 OS=Bos taurus OX=9913 GN=RBM3 PE=1 SV=1
F1MYX8	Breast cancer type 1 susceptibility protein homolog OS=Bos taurus OX=9913 GN=BRCA1 PE=4 SV=2
Q148L0	Charged multivesicular body protein 6 OS=Bos taurus OX=9913 GN=CHMP6 PE=2 SV=1
Q3ZCH0	Stress-70 protein, mitochondrial OS=Bos taurus OX=9913 GN=HSPA9 PE=2 SV=1
Q3T160	Nucleophosmin OS=Bos taurus OX=9913 GN=NPM1 PE=2 SV=1
A0A3Q1NB13	ATP binding cassette subfamily F member 1 OS=Bos taurus OX=9913 GN=ABCF1 PE=1 SV=1
A0A3Q1MAM8	D-dopachrome decarboxylase OS=Bos taurus OX=9913 GN=DDT PE=4 SV=1
A0A3Q1M127	Kinase D interacting substrate 220 OS=Bos taurus OX=9913 GN=KIDINS220 PE=4 SV=1
Q5E959	Serine-threonine kinase receptor-associated protein OS=Bos taurus OX=9913 GN=STRAP PE=2 SV=1
A0A3Q1M241	Nicotinamide phosphoribosyltransferase OS=Bos taurus OX=9913 GN=NAMPT PE=3 SV=1
Q7YRD0	RNA-binding protein PNO1 OS=Bos taurus OX=9913 GN=PNO1 PE=2 SV=1
P82915	28S ribosomal protein S16, mitochondrial OS=Bos taurus OX=9913 GN=MRPS16 PE=1 SV=2
Q0VCM6	Large neutral amino acids transporter small subunit 4 OS=Bos taurus OX=9913 GN=SLC43A2 PE=2 SV=1
G3N2G3	GPRIN family member 3 OS=Bos taurus OX=9913 GN=GPRIN3 PE=4 SV=1
A0A452DKA8	Inositol-tetrakisphosphate 1-kinase OS=Bos taurus OX=9913 GN=ITPK1 PE=4 SV=1
Q2T9L8	Methionine--tRNA ligase, cytoplasmic OS=Bos taurus OX=9913 GN=MARS1 PE=2 SV=1
E1B726	Plasminogen OS=Bos taurus OX=9913 GN=PLG PE=3 SV=2
Q5EAC7	Anamorsin OS=Bos taurus OX=9913 GN=CIAPIN1 PE=2 SV=1
A6H7F4	QTRTD1 protein OS=Bos taurus OX=9913 GN=QTRTD1 PE=2 SV=1
F1N420	Nucleophosmin/nucleoplasmin 3 OS=Bos taurus OX=9913 GN=NPM3 PE=4 SV=1
P63217	Guanine nucleotide-binding protein G(I)/G(S)/G(O) subunit gamma-5 OS=Bos taurus OX=9913 GN=GNG5 PE=1 SV=1
Q29RZ1	Glutamine amidotransferase-like class 1 domain-containing protein 1 OS=Bos taurus OX=9913 GN=GATD1 PE=2 SV=1
A6QLT9	AARS protein OS=Bos taurus OX=9913 GN=AARS1 PE=1 SV=1
Q3T0V3	Eukaryotic translation initiation factor 3 subunit K OS=Bos taurus OX=9913 GN=EIF3K PE=2 SV=1
P84466	Lanosterol synthase OS=Bos taurus OX=9913 GN=LSS PE=1 SV=2
A0A3Q1LLN9	Ribosomal protein L7 like 1 OS=Bos taurus OX=9913 GN=RPL7L1 PE=4 SV=1
E1B7F5	WD repeat and HMG-box DNA binding protein 1 OS=Bos taurus OX=9913 GN=WDHD1 PE=4 SV=2
A7MB49	DDX20 protein OS=Bos taurus OX=9913 GN=DDX20 PE=2 SV=1
A6QQ14	DNA polymerase epsilon subunit 4 OS=Bos taurus OX=9913 GN=POLE4 PE=3 SV=1
Q8SQH5	ADP/ATP translocase 2 OS=Bos taurus OX=9913 GN=SLC25A5 PE=2 SV=3
Q2T9U0	GMPS protein (Fragment) OS=Bos taurus OX=9913 GN=GMPS PE=2 SV=1
P62833	Ras-related protein Rap-1A OS=Bos taurus OX=9913 GN=RAP1A PE=1 SV=1
P68102	Eukaryotic translation initiation factor 2 subunit 1 OS=Bos taurus OX=9913 GN=EIF2S1 PE=2 SV=2
E1BM72	Pescadillo homolog OS=Bos taurus OX=9913 GN=PES1 PE=3 SV=3
E1BKI4	ESF1 nucleolar pre-rRNA processing protein homolog OS=Bos taurus OX=9913 GN=ESF1 PE=4 SV=2
Q58DT4	Pyrroline-5-carboxylate reductase 1, mitochondrial OS=Bos taurus OX=9913 GN=PYCR1 PE=2 SV=1
A6QLA6	Chromatin assembly factor 1 subunit A OS=Bos taurus OX=9913 GN=CHAF1A PE=2 SV=1
A0A3Q1LTG5	La ribonucleoprotein domain family member 4B OS=Bos taurus OX=9913 GN=LARP4B PE=4 SV=1
A0A3Q1LKD4	Lin-9 DREAM MuvB core complex component OS=Bos taurus OX=9913 GN=LIN9 PE=4 SV=1
F1MCT8	Synaptotagmin binding cytoplasmic RNA interacting protein OS=Bos taurus OX=9913 GN=SYNCRIP PE=1 SV=2
Q5JB60	Nucleolin (Fragment) OS=Bos taurus OX=9913 GN=NCL PE=2 SV=1
A4IFC3	Polyadenylate-binding protein OS=Bos taurus OX=9913 GN=PABPC4 PE=2 SV=1
A0A3Q1M5A0	Fragile X mental retardation syndrome-related protein 1 OS=Bos taurus OX=9913 GN=FXR1 PE=4 SV=1
Q3T105	UDP-glucose 4-epimerase OS=Bos taurus OX=9913 GN=GALE PE=2 SV=2
Q5E982	Diphthine methyl ester synthase OS=Bos taurus OX=9913 GN=DPH5 PE=2 SV=1
A0A3Q1NL58	Uncharacterized protein OS=Bos taurus OX=9913 PE=4 SV=1
Q0P5D3	G1/S-specific cyclin-D2 OS=Bos taurus OX=9913 GN=CCND2 PE=2 SV=1
E1BQ19	Ninein OS=Bos taurus OX=9913 GN=NIN PE=4 SV=3
Q2TA25	Serine/threonine-protein kinase PLK1 OS=Bos taurus OX=9913 GN=PLK1 PE=2 SV=2
F1MBN7	RIO kinase 2 OS=Bos taurus OX=9913 GN=RIOK2 PE=4 SV=1
F1MK61	NOP2/Sun RNA methyltransferase 2 OS=Bos taurus OX=9913 GN=NSUN2 PE=1 SV=2
A5PJM5	Mini-chromosome maintenance complex-binding protein OS=Bos taurus OX=9913 GN=MCMBP PE=2 SV=1
Q3SZ46	Nucleolar protein 7 OS=Bos taurus OX=9913 GN=NOL7 PE=2 SV=1
Q3T042	RNA-binding protein NOB1 OS=Bos taurus OX=9913 GN=NOB1 PE=2 SV=1
E1BMU6	A-kinase anchoring protein 1 OS=Bos taurus OX=9913 GN=AKAP1 PE=4 SV=1
E1BC22	Cytosolic iron-sulfur assembly component 2B OS=Bos taurus OX=9913 GN=CIAO2B PE=4 SV=2
A5PKL6	Glutathione S-transferase C-terminal domain-containing protein OS=Bos taurus OX=9913 GN=GSTCD PE=2 SV=1
Q3ZBZ8	Stress-induced-phosphoprotein 1 OS=Bos taurus OX=9913 GN=STIP1 PE=2 SV=1
E1BPX9	Leucine rich pentatricopeptide repeat containing OS=Bos taurus OX=9913 GN=LRPPRC PE=4 SV=3
Q3ZBH0	T-complex protein 1 subunit beta OS=Bos taurus OX=9913 GN=CCT2 PE=1 SV=3
Q2TBI4	Heat shock protein 75 kDa, mitochondrial OS=Bos taurus OX=9913 GN=TRAP1 PE=2 SV=1
Q2KI84	Histidine--tRNA ligase, cytoplasmic OS=Bos taurus OX=9913 GN=HARS1 PE=2 SV=1
Q862F2	Galectin (Fragment) OS=Bos taurus OX=9913 PE=2 SV=1
Q3SZ86	28S ribosomal protein S26, mitochondrial OS=Bos taurus OX=9913 GN=MRPS26 PE=1 SV=1
A0A3Q1NAY5	DnaJ heat shock protein family (Hsp40) member C9 OS=Bos taurus OX=9913 GN=DNAJC9 PE=4 SV=1
P79244	60S ribosomal protein L37 OS=Bos taurus OX=9913 GN=RPL37 PE=3 SV=4
Q0VCW8	Phosducin-like protein 3 OS=Bos taurus OX=9913 GN=PDCL3 PE=2 SV=1
E1BGZ3	AT-rich interaction domain 3A OS=Bos taurus OX=9913 GN=ARID3A PE=4 SV=3
Q3SZ15	Eukaryotic translation elongation factor 1 epsilon 1 OS=Bos taurus OX=9913 GN=EEF1E1 PE=2 SV=1
Q3T0E1	Exosome complex component RRP40 OS=Bos taurus OX=9913 GN=EXOSC3 PE=2 SV=1
Q3T0E0	Copper transport protein ATOX1 OS=Bos taurus OX=9913 GN=ATOX1 PE=3 SV=1
Q2YDM9	Hypothetical LOC780876 OS=Bos taurus OX=9913 GN=LOC780876 PE=2 SV=1
A1L552	Integrator complex subunit 5 OS=Bos taurus OX=9913 GN=INTS5 PE=2 SV=1
F6QH94	Protein disulfide isomerase family A member 6 OS=Bos taurus OX=9913 GN=PDIA6 PE=1 SV=1
E1BGE5	Importin 7 OS=Bos taurus OX=9913 GN=IPO7 PE=4 SV=1
Q0IIH5	Nucleobindin 2 OS=Bos taurus OX=9913 GN=NUCB2 PE=2 SV=1
P28339	DNA polymerase delta catalytic subunit OS=Bos taurus OX=9913 GN=POLD1 PE=1 SV=1
A0A3Q1LL63	ACPS domain-containing protein OS=Bos taurus OX=9913 GN=AASDHPPT PE=4 SV=1
Q27U16	TRIM OS=Bos taurus OX=9913 GN=TRIM5 PE=2 SV=1
A0A140T849	Protein pelota homolog OS=Bos taurus OX=9913 GN=PELO PE=3 SV=1
Q3ZCF7	Ubiquitin-conjugating enzyme E2 D3 OS=Bos taurus OX=9913 GN=UBE2D3 PE=2 SV=1
A0A3Q1M7W0	Pyridoxal-dependent decarboxylase domain-containing protein 1 OS=Bos taurus OX=9913 GN=PDXDC1 PE=1 SV=1
A7MB14	GIGYF2 protein OS=Bos taurus OX=9913 GN=GIGYF2 PE=2 SV=1
E1BL00	WD_REPEATS_REGION domain-containing protein OS=Bos taurus OX=9913 GN=PWP2 PE=4 SV=2
Q3SYS6	Calcineurin B homologous protein 1 OS=Bos taurus OX=9913 GN=CHP1 PE=2 SV=1
Q2TA06	Aurora kinase A OS=Bos taurus OX=9913 GN=AURKA PE=2 SV=1
Q76LV2	Heat shock protein HSP 90-alpha OS=Bos taurus OX=9913 GN=HSP90AA1 PE=1 SV=3
A4FUD0	MTHFD1 protein OS=Bos taurus OX=9913 GN=MTHFD1 PE=1 SV=1
F1N4V5	N(alpha)-acetyltransferase 15, NatA auxiliary subunit OS=Bos taurus OX=9913 GN=NAA15 PE=4 SV=2
G5E536	Importin subunit alpha OS=Bos taurus OX=9913 GN=KPNA6 PE=3 SV=2
Q3ZCF5	Ornithine aminotransferase, mitochondrial OS=Bos taurus OX=9913 GN=OAT PE=2 SV=1
F1MB04	Caspase-3 OS=Bos taurus OX=9913 GN=CASP3 PE=3 SV=2
F1MLM2	Helicase like transcription factor OS=Bos taurus OX=9913 GN=HLTF PE=4 SV=3
G3MXS5	Uncharacterized protein OS=Bos taurus OX=9913 GN=LOC101906009 PE=4 SV=2
Q3ZBH8	40S ribosomal protein S20 OS=Bos taurus OX=9913 GN=RPS20 PE=3 SV=1
F1MCP5	Kinesin motor domain-containing protein OS=Bos taurus OX=9913 GN=KIF4A PE=3 SV=2
A4FV84	mRNA turnover protein 4 homolog OS=Bos taurus OX=9913 GN=MRTO4 PE=2 SV=1
Q24JY3	Kinetochore protein Spc24 OS=Bos taurus OX=9913 GN=SPC24 PE=2 SV=1
A0A3Q1MJE8	Hyaluronan mediated motility receptor OS=Bos taurus OX=9913 GN=HMMR PE=4 SV=1
F1MQ65	Myosin IE OS=Bos taurus OX=9913 GN=MYO1E PE=3 SV=2
F1N155	Caseinolytic mitochondrial matrix peptidase chaperone subunit OS=Bos taurus OX=9913 GN=CLPX PE=4 SV=2
F1N2D3	Tight junction protein 1 OS=Bos taurus OX=9913 GN=TJP1 PE=3 SV=3
E1BJ22	Sperm associated antigen 5 OS=Bos taurus OX=9913 GN=SPAG5 PE=4 SV=3
F1N0E5	T-complex protein 1 subunit delta OS=Bos taurus OX=9913 GN=CCT4 PE=3 SV=2
Q3T0M7	Ran-specific GTPase-activating protein OS=Bos taurus OX=9913 GN=RANBP1 PE=2 SV=1
Q58DW3	60S ribosomal protein L29 OS=Bos taurus OX=9913 GN=RPL29 PE=2 SV=3
Q3ZBJ0	Transcription and mRNA export factor ENY2 OS=Bos taurus OX=9913 GN=ENY2 PE=3 SV=1
A0A3Q1MIW0	Alpha-fetoprotein OS=Bos taurus OX=9913 GN=AFP PE=1 SV=1
Q0VCJ2	Methylthioribulose-1-phosphate dehydratase OS=Bos taurus OX=9913 GN=APIP PE=2 SV=1
A0A3Q1M474	ER membrane protein complex subunit 2 OS=Bos taurus OX=9913 GN=EMC2 PE=4 SV=1
A0A3Q1MBW9	COMM domain-containing protein 7 OS=Bos taurus OX=9913 GN=COMMD7 PE=4 SV=1
E1BJC0	Carnosine N-methyltransferase 1 OS=Bos taurus OX=9913 GN=CARNMT1 PE=4 SV=2
A0A3Q1M278	26S proteasome regulatory subunit 8 OS=Bos taurus OX=9913 GN=PSMC5 PE=3 SV=1
L7R4Y6	Eukaryotic translation elongation factor 1 delta transcript variant 2 OS=Bos taurus OX=9913 GN=eef1d PE=2 SV=1
A0A3Q1MUD4	High density lipoprotein binding protein OS=Bos taurus OX=9913 GN=HDLBP PE=1 SV=1
F1MLG1	SRP receptor subunit beta OS=Bos taurus OX=9913 GN=SRPRB PE=1 SV=3
A0A3Q1LUG9	Uncharacterized protein OS=Bos taurus OX=9913 GN=TXNDC5 PE=1 SV=1
A0A3Q1LQL1	ATPase family AAA domain containing 2 OS=Bos taurus OX=9913 GN=ATAD2 PE=4 SV=1
A0A452DHY7	Ethanolamine-phosphate cytidylyltransferase OS=Bos taurus OX=9913 GN=PCYT2 PE=4 SV=1
F1MBQ2	Ubiquitin conjugating enzyme E2 J1 OS=Bos taurus OX=9913 GN=UBE2J1 PE=4 SV=3
A0A3Q1NCG7	Nicalin OS=Bos taurus OX=9913 GN=NCLN PE=3 SV=1
A2VDP5	Bis(5'-adenosyl)-triphosphatase ENPP4 OS=Bos taurus OX=9913 GN=ENPP4 PE=2 SV=1
A0A3Q1MKY2	DUF953 domain-containing protein OS=Bos taurus OX=9913 GN=TXNDC17 PE=1 SV=1
Q1LZ90	Chloride channel, nucleotide-sensitive, 1A OS=Bos taurus OX=9913 GN=CLNS1A PE=2 SV=1
Q0VCI6	PIH1 domain-containing protein 1 OS=Bos taurus OX=9913 GN=PIH1D1 PE=2 SV=1
Q2KHU1	Chromosome 21 open reading frame 70 ortholog OS=Bos taurus OX=9913 GN=FAM207A PE=2 SV=1
A4FUC6	SFRS9 protein OS=Bos taurus OX=9913 GN=SRSF9 PE=2 SV=1
E1BM12	Spermidine synthase OS=Bos taurus OX=9913 GN=SRM PE=3 SV=2
Q2KHX7	mRNA-capping enzyme OS=Bos taurus OX=9913 GN=RNGTT PE=2 SV=1
A0A3Q1LZV8	Tudor domain-containing protein OS=Bos taurus OX=9913 GN=SMN2 PE=4 SV=1
Q17QZ7	Tetratricopeptide repeat protein 27 OS=Bos taurus OX=9913 GN=TTC27 PE=2 SV=1
A0A3Q1N4V3	SAP domain-containing protein OS=Bos taurus OX=9913 GN=ERI1 PE=4 SV=1
F1MLL8	Nudix hydrolase 1 OS=Bos taurus OX=9913 GN=NUDT1 PE=3 SV=3
A0A3Q1MTL6	T-complex protein 1 subunit theta OS=Bos taurus OX=9913 GN=CCT8 PE=1 SV=1
P05307	Protein disulfide-isomerase OS=Bos taurus OX=9913 GN=P4HB PE=1 SV=1
A7MBC5	IARS protein OS=Bos taurus OX=9913 GN=IARS1 PE=2 SV=1
A0A3Q1LW69	Ataxin 2 like OS=Bos taurus OX=9913 GN=ATXN2L PE=4 SV=1
A0A452DJ21	Eukaryotic translation initiation factor 4E OS=Bos taurus OX=9913 GN=EIF4E PE=3 SV=1
A0A3Q1N043	Translation machinery-associated protein 16 OS=Bos taurus OX=9913 GN=TMA16 PE=4 SV=1
Q0P5F3	Protein lin-7 homolog C OS=Bos taurus OX=9913 GN=LIN7C PE=2 SV=1
A0A3Q1LNY2	Tetratricopeptide repeat protein 5 OS=Bos taurus OX=9913 GN=TTC5 PE=4 SV=1
Q2NKU0	Centromere protein X OS=Bos taurus OX=9913 GN=CENPX PE=3 SV=1
E1B867	ADAM metallopeptidase domain 17 OS=Bos taurus OX=9913 GN=ADAM17 PE=4 SV=2
A2VDL4	Neutral amino acid transporter A OS=Bos taurus OX=9913 GN=SLC1A4 PE=2 SV=1
O19135	Na+/myo-inositol cotransporter OS=Bos taurus OX=9913 PE=3 SV=1
F1MD63	DIX domain containing 1 OS=Bos taurus OX=9913 GN=DIXDC1 PE=4 SV=2
E1BC46	Kinesin-like protein OS=Bos taurus OX=9913 GN=KIF18B PE=3 SV=2
E1BBY7	Heat shock protein family A (Hsp70) member 4 OS=Bos taurus OX=9913 GN=HSPA4 PE=1 SV=2
Q2HJ94	DnaJ homolog subfamily A member 2 OS=Bos taurus OX=9913 GN=DNAJA2 PE=2 SV=1
A6H7B7	SFRS5 protein OS=Bos taurus OX=9913 GN=SRSF5 PE=1 SV=1
F1MH70	Condensin complex subunit 2 OS=Bos taurus OX=9913 GN=NCAPH PE=3 SV=1
G3X6L5	ADP ribosylation factor like GTPase 8A OS=Bos taurus OX=9913 GN=ARL8A PE=3 SV=2
Q08DT0	RNA helicase OS=Bos taurus OX=9913 GN=DDX10 PE=2 SV=1
E1BGT6	Pseudouridine synthase 7 like OS=Bos taurus OX=9913 GN=PUS7L PE=4 SV=2
A5D7U0	Cytoskeleton-associated protein 2 OS=Bos taurus OX=9913 GN=CKAP2 PE=2 SV=1
M5FHN8	Ribosomal L1 domain-containing protein 1 OS=Bos taurus OX=9913 GN=RSL1D1 PE=4 SV=1
C0KTK9	Usp9y OS=Bos taurus OX=9913 PE=2 SV=1
A4IFE3	Beta-centractin OS=Bos taurus OX=9913 GN=ACTR1B PE=2 SV=1
A0A3Q1MDC6	Nicastrin OS=Bos taurus OX=9913 GN=NCSTN PE=1 SV=1
Q32P78	DNA-directed RNA polymerases I, II, and III subunit RPABC5 OS=Bos taurus OX=9913 GN=POLR2L PE=1 SV=1
F1MHN8	CD166 antigen OS=Bos taurus OX=9913 GN=ALCAM PE=4 SV=2
A0A3Q1MGD1	Choline kinase alpha OS=Bos taurus OX=9913 GN=CHKA PE=4 SV=1
O77480	Methionyl-tRNA formyltransferase, mitochondrial OS=Bos taurus OX=9913 GN=MTFMT PE=1 SV=2
E1BGN7	Cyclic GMP-AMP synthase OS=Bos taurus OX=9913 GN=CGAS PE=3 SV=1
Q3YJJ1	MHC class I antigen (Fragment) OS=Bos taurus OX=9913 GN=BoLA PE=3 SV=1
Q56JX5	40S ribosomal protein S25 OS=Bos taurus OX=9913 GN=RPS25 PE=2 SV=1
G5E5K1	Prefoldin subunit 3 OS=Bos taurus OX=9913 GN=VBP1 PE=3 SV=1
A0A3Q1M2U1	Coiled-coil domain containing 88B OS=Bos taurus OX=9913 GN=CCDC88B PE=4 SV=1
Q2TBV6	Coiled-coil domain-containing protein 124 OS=Bos taurus OX=9913 GN=CCDC124 PE=2 SV=1
P69341	Poly(A)-specific ribonuclease PARN OS=Bos taurus OX=9913 GN=PARN PE=1 SV=2
G3X823	Tripartite motif containing 26 OS=Bos taurus OX=9913 GN=TRIM26 PE=4 SV=2
Q17R07	ADP-ribosylation factor GTPase-activating protein 3 OS=Bos taurus OX=9913 GN=ARFGAP3 PE=2 SV=1
Q58D06	WD repeat-containing protein 74 OS=Bos taurus OX=9913 GN=WDR74 PE=2 SV=1
E1BQ03	Nucleus accumbens associated 1 OS=Bos taurus OX=9913 GN=NACC1 PE=4 SV=1
A0A3Q1LJV9	Signal transducing adaptor family member 1 OS=Bos taurus OX=9913 GN=STAP1 PE=4 SV=1
Q1JQA7	Fructose-2,6-bisphosphatase TIGAR OS=Bos taurus OX=9913 GN=TIGAR PE=2 SV=1
P63243	Receptor of activated protein C kinase 1 OS=Bos taurus OX=9913 GN=RACK1 PE=2 SV=3
A0A3Q1M1D3	Nuclear autoantigenic sperm protein OS=Bos taurus OX=9913 GN=NASP PE=4 SV=1
Q9XSI3	60S ribosomal protein L10 OS=Bos taurus OX=9913 GN=RPL10 PE=2 SV=4
A7YWF1	ACSS2 protein OS=Bos taurus OX=9913 GN=ACSS2 PE=1 SV=1
A0A3Q1LY33	Replication factor C subunit 5 OS=Bos taurus OX=9913 GN=RFC5 PE=4 SV=1
E1BC36	Cyclin dependent kinase 6 OS=Bos taurus OX=9913 GN=CDK6 PE=3 SV=1
P60984	Glia maturation factor beta OS=Bos taurus OX=9913 GN=GMFB PE=1 SV=2
Q2TA37	ADP-ribosylation factor-like protein 2 OS=Bos taurus OX=9913 GN=ARL2 PE=1 SV=1
A0A3Q1LWW3	Zinc finger protein 598 OS=Bos taurus OX=9913 GN=ZNF598 PE=4 SV=1
F1N6Y7	Eukaryotic translation initiation factor 5B OS=Bos taurus OX=9913 GN=EIF5B PE=1 SV=3
F1MLV1	26S proteasome regulatory subunit 10B OS=Bos taurus OX=9913 GN=PSMC6 PE=3 SV=2
Q2KJH7	Delta-1-pyrroline-5-carboxylate synthase OS=Bos taurus OX=9913 GN=ALDH18A1 PE=2 SV=1
P31754	Uridine 5'-monophosphate synthase OS=Bos taurus OX=9913 GN=UMPS PE=2 SV=1
A1XEA0	Elongation factor 1 alpha (Fragment) OS=Bos taurus OX=9913 GN=EEF1A1 PE=2 SV=1
A7MBI8	NUDT9 protein OS=Bos taurus OX=9913 GN=NUDT9 PE=2 SV=1
V6F834	Zinc finger protein ZPR1 OS=Bos taurus OX=9913 GN=ZNF259 PE=4 SV=1
Q3T0H5	Zinc finger protein 622 OS=Bos taurus OX=9913 GN=ZNF622 PE=2 SV=1
Q3ZBK3	Kinetochore protein Spc25 OS=Bos taurus OX=9913 GN=SPC25 PE=2 SV=1
E1BGI6	ATP-dependent RNA helicase DDX54 OS=Bos taurus OX=9913 GN=DDX54 PE=3 SV=3
A5PJU0	Nucleolar protein 6 OS=Bos taurus OX=9913 GN=NOL6 PE=2 SV=1
A6H716	BRAP protein OS=Bos taurus OX=9913 GN=BRAP PE=2 SV=1
A0A3Q1MUH5	Zinc ribbon domain containing 2 OS=Bos taurus OX=9913 GN=ZNRD2 PE=4 SV=1
A0A3Q1LT57	Protein CASC3 OS=Bos taurus OX=9913 GN=CASC3 PE=4 SV=1
A0A3Q1LQR2	Tubulin alpha chain OS=Bos taurus OX=9913 GN=LOC112443216 PE=3 SV=1
A4IFB8	IPO4 protein OS=Bos taurus OX=9913 GN=IPO4 PE=2 SV=1
Q56JW9	X-linked eukaryotic translation initiation factor 1A OS=Bos taurus OX=9913 PE=2 SV=1
Q3T148	Eukaryotic translation initiation factor 3 subunit M OS=Bos taurus OX=9913 GN=EIF3M PE=2 SV=2
F1MSD6	Trafficking protein particle complex subunit 5 OS=Bos taurus OX=9913 GN=TRAPPC5 PE=3 SV=1
F1MJR1	URB2 ribosome biogenesis homolog OS=Bos taurus OX=9913 GN=URB2 PE=4 SV=1
A0A452DID6	Dehydrogenase/reductase SDR family member 11 OS=Bos taurus OX=9913 GN=DHRS11 PE=3 SV=1
Q0VCK9	Vacuole membrane protein 1 OS=Bos taurus OX=9913 GN=VMP1 PE=2 SV=1
Q95M18	Endoplasmin OS=Bos taurus OX=9913 GN=HSP90B1 PE=2 SV=1
P63048	Ubiquitin-60S ribosomal protein L40 OS=Bos taurus OX=9913 GN=UBA52 PE=1 SV=2
B0JYN3	L-lactate dehydrogenase OS=Bos taurus OX=9913 GN=LDHB PE=2 SV=1
A0A3Q1M0F0	Hexokinase-1 OS=Bos taurus OX=9913 GN=HK1 PE=1 SV=1
Q3T171	60S ribosomal protein L36 OS=Bos taurus OX=9913 GN=RPL36 PE=3 SV=3
A5PJY0	LMAN1 protein OS=Bos taurus OX=9913 GN=LMAN1 PE=2 SV=1
Q2KI14	N-alpha-acetyltransferase 10 OS=Bos taurus OX=9913 GN=NAA10 PE=2 SV=1
E1BMI6	G protein nucleolar 3 OS=Bos taurus OX=9913 GN=GNL3 PE=4 SV=2
Q862K7	Dynein light chain (Fragment) OS=Bos taurus OX=9913 PE=2 SV=1
Q3T0N3	Calcium load-activated calcium channel OS=Bos taurus OX=9913 GN=TMCO1 PE=2 SV=1
A0A3Q1LQ42	Guanine nucleotide-binding protein-like 3-like protein OS=Bos taurus OX=9913 GN=GNL3L PE=4 SV=1
Q0IIH8	Ubiquitin carboxyl-terminal hydrolase MINDY-3 OS=Bos taurus OX=9913 GN=MINDY3 PE=2 SV=1
Q2KHV6	Sorting nexin-8 OS=Bos taurus OX=9913 GN=SNX8 PE=2 SV=1
F1MZK4	Basic leucine zipper and W2 domains 1 OS=Bos taurus OX=9913 GN=BZW1 PE=4 SV=3
A0A3Q1M913	Phosphoribosylformylglycinamidine synthase OS=Bos taurus OX=9913 GN=PFAS PE=3 SV=1
Q2TBV1	Replication factor C subunit 3 OS=Bos taurus OX=9913 GN=RFC3 PE=2 SV=1
Q32PJ6	Probable cytosolic iron-sulfur protein assembly protein CIAO1 OS=Bos taurus OX=9913 GN=CIAO1 PE=2 SV=1
Q3SZE2	Prefoldin subunit 1 OS=Bos taurus OX=9913 GN=PFDN1 PE=2 SV=1
A0A3Q1LP31	Atlastin GTPase 2 OS=Bos taurus OX=9913 GN=ATL2 PE=4 SV=1
A6QQR4	DNA excision repair protein ERCC-6-like OS=Bos taurus OX=9913 GN=ERCC6L PE=2 SV=1
E1BLB6	Protein kinase, DNA-activated, catalytic subunit OS=Bos taurus OX=9913 GN=PRKDC PE=3 SV=3
A0A3Q1NAH6	Chromosome 6 C4orf3 homolog OS=Bos taurus OX=9913 GN=C6H4orf3 PE=4 SV=1
P68103	Elongation factor 1-alpha 1 OS=Bos taurus OX=9913 GN=EEF1A1 PE=1 SV=1
E1B7K5	Cytoskeleton associated protein 5 OS=Bos taurus OX=9913 GN=CKAP5 PE=4 SV=2
F1MWN1	Exportin-2 OS=Bos taurus OX=9913 GN=CSE1L PE=4 SV=1
Q3ZBH5	Proliferation-associated 2G4, 38kDa OS=Bos taurus OX=9913 GN=PA2G4 PE=1 SV=1
Q32PB9	60S ribosomal protein L38 OS=Bos taurus OX=9913 GN=RPL38 PE=3 SV=4
Q1JPH6	Eukaryotic translation initiation factor 4H OS=Bos taurus OX=9913 GN=EIF4H PE=2 SV=1
E1BEJ3	Elongation factor G, mitochondrial OS=Bos taurus OX=9913 GN=GFM1 PE=3 SV=2
F1MSM5	Mitochondrial poly(A) polymerase OS=Bos taurus OX=9913 GN=MTPAP PE=4 SV=1
A0A3Q1LWY4	Serine/threonine-protein phosphatase 2A 56 kDa regulatory subunit OS=Bos taurus OX=9913 GN=PPP2R5E PE=3 SV=1
Q3SZK1	Angio-associated migratory cell protein OS=Bos taurus OX=9913 GN=AAMP PE=2 SV=1
F6QYT8	AP-1 complex subunit gamma OS=Bos taurus OX=9913 GN=AP1G2 PE=3 SV=1
A5PJG7	Cytochrome c-type heme lyase OS=Bos taurus OX=9913 GN=HCCS PE=2 SV=1
A6H7A4	BET1 protein OS=Bos taurus OX=9913 GN=BET1 PE=2 SV=1
F1MVC0	Carbamoyl-phosphate synthetase 2, aspartate transcarbamylase, and dihydroorotase OS=Bos taurus OX=9913 GN=CAD PE=3 SV=3
A4IFE6	ABCE1 protein OS=Bos taurus OX=9913 GN=ABCE1 PE=2 SV=1
A0A140T878	Signal transducer and activator of transcription OS=Bos taurus OX=9913 GN=STAT5B PE=3 SV=1
F1N533	RNA helicase OS=Bos taurus OX=9913 GN=DDX18 PE=3 SV=3
F1N3B9	Thyroid hormone receptor interactor 13 OS=Bos taurus OX=9913 GN=TRIP13 PE=3 SV=2
O18778	Phytanoyl-CoA dioxygenase, peroxisomal OS=Bos taurus OX=9913 GN=PHYH PE=2 SV=2
A0A3Q1LYQ7	Signal recognition particle 9 kDa protein OS=Bos taurus OX=9913 GN=SRP9 PE=3 SV=1
A0A3Q1MNB2	HAUS augmin like complex subunit 8 OS=Bos taurus OX=9913 GN=HAUS8 PE=4 SV=1
Q9BG99	Three-prime repair exonuclease 1 OS=Bos taurus OX=9913 GN=TREX1 PE=1 SV=1
G3X6A9	Taxilin gamma OS=Bos taurus OX=9913 GN=TXLNG PE=4 SV=1
Q1LZC4	Mitochondrial genome maintenance exonuclease 1 OS=Bos taurus OX=9913 GN=MGME1 PE=2 SV=1
A0A3Q1MK49	A-kinase anchoring protein 9 OS=Bos taurus OX=9913 GN=AKAP9 PE=4 SV=1
F1MUZ9	60 kDa heat shock protein, mitochondrial OS=Bos taurus OX=9913 GN=HSPD1 PE=1 SV=1
Q2HJ97	Prohibitin-2 OS=Bos taurus OX=9913 GN=PHB2 PE=2 SV=1
Q2KHU8	Eukaryotic translation initiation factor 2 subunit 3 OS=Bos taurus OX=9913 GN=EIF2S3 PE=2 SV=1
Q3T122	Eukaryotic translation initiation factor 3 subunit D OS=Bos taurus OX=9913 GN=EIF3D PE=2 SV=1
Q1RMM1	Zinc finger CCCH domain-containing protein 15 OS=Bos taurus OX=9913 GN=ZC3H15 PE=2 SV=1
A6QQ09	LOC100138230 protein (Fragment) OS=Bos taurus OX=9913 GN=LOC100138230 PE=2 SV=1
Q9GKZ4	Translocating chain-associated membrane protein 1 OS=Bos taurus OX=9913 GN=TRAM1 PE=2 SV=3
A5PJS4	LOC100138178 protein (Fragment) OS=Bos taurus OX=9913 GN=LOC100138178 PE=2 SV=1
E1BMI8	TNF receptor-associated factor OS=Bos taurus OX=9913 GN=TRAF1 PE=3 SV=2
E1BF33	Uncharacterized protein OS=Bos taurus OX=9913 PE=4 SV=1
E1BAB6	Anaphase promoting complex subunit 1 OS=Bos taurus OX=9913 GN=ANAPC1 PE=4 SV=2
Q3T018	Chromosome 14 open reading frame 1 ortholog OS=Bos taurus OX=9913 GN=ERG28 PE=2 SV=1
E1BGK5	Protein kinase domain-containing protein OS=Bos taurus OX=9913 GN=CSNK1E PE=3 SV=3
Q32PD0	rRNA-processing protein FCF1 homolog OS=Bos taurus OX=9913 GN=FCF1 PE=2 SV=1
A7MB16	Eukaryotic translation initiation factor 3 subunit B OS=Bos taurus OX=9913 GN=EIF3B PE=2 SV=1
F1N2T0	Heterogeneous nuclear ribonucleoprotein D like OS=Bos taurus OX=9913 GN=HNRNPDL PE=1 SV=1
Q862J9	Similar to ribosomal protein L17 (Fragment) OS=Bos taurus OX=9913 PE=2 SV=1
A0JNE6	Eukaryotic translation initiation factor 2-alpha kinase 2 OS=Bos taurus OX=9913 GN=EIF2AK2 PE=1 SV=1
M5FK31	Elongin B OS=Bos taurus OX=9913 GN=TCEB2 PE=4 SV=1
Q29423	CD44 antigen OS=Bos taurus OX=9913 GN=CD44 PE=2 SV=1
M5FHM4	STIP1 homology and U-box containing protein 1 OS=Bos taurus OX=9913 GN=STUB1 PE=4 SV=1
A6H768	Galactokinase OS=Bos taurus OX=9913 GN=GALK1 PE=2 SV=2
Q5EA53	General transcription factor IIF subunit 1 OS=Bos taurus OX=9913 GN=GTF2F1 PE=2 SV=1
F1MYD0	Cullin 1 OS=Bos taurus OX=9913 GN=CUL1 PE=3 SV=2
Q3T0D3	Protein N-terminal glutamine amidohydrolase OS=Bos taurus OX=9913 GN=WDYHV1 PE=1 SV=2
F1N469	Uncharacterized protein OS=Bos taurus OX=9913 PE=4 SV=3
Q7YS70	Enoyl-[acyl-carrier-protein] reductase, mitochondrial OS=Bos taurus OX=9913 GN=MECR PE=1 SV=1
Q56JV9	40S ribosomal protein S3a OS=Bos taurus OX=9913 GN=RPS3A PE=2 SV=3
E1BKX3	MYB binding protein 1a OS=Bos taurus OX=9913 GN=MYBBP1A PE=1 SV=1
E1B748	Hypoxia up-regulated 1 OS=Bos taurus OX=9913 GN=HYOU1 PE=1 SV=2
A0A3Q1MNU0	Transport and Golgi organization protein 1 homolog OS=Bos taurus OX=9913 GN=MIA3 PE=4 SV=1
A0A3Q1N7W2	Serine/threonine-protein kinase VRK1 OS=Bos taurus OX=9913 GN=VRK1 PE=3 SV=1
F1MSR6	TSR1 ribosome maturation factor OS=Bos taurus OX=9913 GN=TSR1 PE=4 SV=3
E1BF29	Kinesin family member 11 OS=Bos taurus OX=9913 GN=KIF11 PE=3 SV=3
A0A3Q1M2E0	WD_REPEATS_REGION domain-containing protein OS=Bos taurus OX=9913 GN=WDR36 PE=4 SV=1
Q0VBZ6	TIA1 cytotoxic granule-associated RNA binding protein OS=Bos taurus OX=9913 GN=TIA1 PE=2 SV=1
F1MJ55	Casein kinase II subunit alpha' OS=Bos taurus OX=9913 GN=CSNK2A2 PE=3 SV=3
A1A4L8	Adenylyltransferase and sulfurtransferase MOCS3 OS=Bos taurus OX=9913 GN=MOCS3 PE=2 SV=2
Q8MJN0	FUN14 domain-containing protein 2 OS=Bos taurus OX=9913 GN=FUNDC2 PE=2 SV=1
A6QQP0	MYEF2 protein OS=Bos taurus OX=9913 GN=MYEF2 PE=2 SV=1
M5FKF8	Zinc finger CCCH-type containing 7A OS=Bos taurus OX=9913 GN=ZC3H7A PE=4 SV=1
F1MQH8	Rabaptin, RAB GTPase binding effector protein 1 OS=Bos taurus OX=9913 GN=RABEP1 PE=4 SV=1
P19120	Heat shock cognate 71 kDa protein OS=Bos taurus OX=9913 GN=HSPA8 PE=1 SV=2
P19858	L-lactate dehydrogenase A chain OS=Bos taurus OX=9913 GN=LDHA PE=2 SV=2
A1L5B7	SERPINE1 mRNA binding protein 1 OS=Bos taurus OX=9913 GN=SERBP1 PE=1 SV=1
A2VE06	40S ribosomal protein S4 OS=Bos taurus OX=9913 GN=RPS4Y1 PE=2 SV=1
Q3SYT9	Poly(RC) binding protein 2 OS=Bos taurus OX=9913 GN=PCBP2 PE=1 SV=1
P10881	Lupus La protein homolog OS=Bos taurus OX=9913 GN=SSB PE=2 SV=2
P42899	60S acidic ribosomal protein P2 OS=Bos taurus OX=9913 GN=RPLP2 PE=3 SV=1
Q2HJ33	Obg-like ATPase 1 OS=Bos taurus OX=9913 GN=OLA1 PE=2 SV=1
Q3MHE8	Signal recognition particle receptor subunit alpha OS=Bos taurus OX=9913 GN=SRPRA PE=2 SV=1
Q17QL4	MAGE family member D2 OS=Bos taurus OX=9913 GN=MAGED2 PE=2 SV=1
Q3ZCD7	Very-long-chain enoyl-CoA reductase OS=Bos taurus OX=9913 GN=TECR PE=2 SV=1
A0JNE9	CTP synthase OS=Bos taurus OX=9913 GN=CTPS1 PE=2 SV=1
A0A3Q1LY70	Nardilysin convertase OS=Bos taurus OX=9913 GN=NRDC PE=4 SV=1
Q29RG5	DDX18 protein (Fragment) OS=Bos taurus OX=9913 GN=DDX18 PE=2 SV=1
E1BF82	NDC80 kinetochore complex component OS=Bos taurus OX=9913 GN=NDC80 PE=4 SV=2
Q58DG1	UPF0160 protein MYG1, mitochondrial OS=Bos taurus OX=9913 PE=2 SV=1
E1BB36	Mannosyl (alpha-1,6-)-glycoprotein beta-1,2-N-acetylglucosaminyltransferase OS=Bos taurus OX=9913 GN=MGAT2 PE=4 SV=3
Q2TBH1	Centromere protein M OS=Bos taurus OX=9913 GN=CENPM PE=2 SV=1
E1BF67	T cell immunoreceptor with Ig and ITIM domains OS=Bos taurus OX=9913 GN=TIGIT PE=4 SV=2
Q58DT8	WD repeat-containing protein 55 OS=Bos taurus OX=9913 GN=WDR55 PE=2 SV=1
Q3T138	BolA-like protein 1 OS=Bos taurus OX=9913 GN=BOLA1 PE=2 SV=1
E1BEM1	Eukaryotic elongation factor 2 kinase OS=Bos taurus OX=9913 GN=EEF2K PE=3 SV=1
Q1JP95	Proteasome 26S ATPase subunit 3 (Fragment) OS=Bos taurus OX=9913 GN=PSMC3 PE=2 SV=1
Q3T165	Prohibitin OS=Bos taurus OX=9913 GN=PHB PE=2 SV=1
Q56JX8	40S ribosomal protein S13 OS=Bos taurus OX=9913 GN=RPS13 PE=2 SV=3
Q5E9A1	Nascent polypeptide-associated complex subunit alpha OS=Bos taurus OX=9913 GN=NACA PE=1 SV=1
F1MBF0	Eukaryotic translation initiation factor 2A OS=Bos taurus OX=9913 GN=EIF2A PE=1 SV=1
Q0IIJ0	N-alpha-acetyltransferase 50 OS=Bos taurus OX=9913 GN=NAA50 PE=2 SV=1
F6QV99	ATPase family AAA domain-containing protein 1 OS=Bos taurus OX=9913 GN=ATAD1 PE=2 SV=2
G9HR69	MHC class I antigen (Fragment) OS=Bos taurus OX=9913 GN=BoLA PE=3 SV=1
Q3T0U1	LRP chaperone MESD OS=Bos taurus OX=9913 GN=MESD PE=2 SV=1
Q1JQD2	Glutamate-rich WD repeat-containing protein 1 OS=Bos taurus OX=9913 GN=GRWD1 PE=2 SV=1
Q2TBI9	M-phase phosphoprotein 6 OS=Bos taurus OX=9913 GN=MPHOSPH6 PE=2 SV=1
F1ML88	Pseudouridylate synthase 7 homolog OS=Bos taurus OX=9913 GN=PUS7 PE=4 SV=3
Q3ZC87	Pyruvate kinase (Fragment) OS=Bos taurus OX=9913 GN=PKM2 PE=2 SV=1
G3X6L9	Glutamyl-prolyl-tRNA synthetase OS=Bos taurus OX=9913 GN=EPRS1 PE=1 SV=2
Q3SWX8	Histone-binding protein RBBP7 OS=Bos taurus OX=9913 GN=RBBP7 PE=2 SV=1
F1N7H0	DnaJ heat shock protein family (Hsp40) member C7 OS=Bos taurus OX=9913 GN=DNAJC7 PE=4 SV=3
Q3T0Q6	Cellular nucleic acid-binding protein OS=Bos taurus OX=9913 GN=CNBP PE=2 SV=1
A0A3Q1M070	Ribosomal RNA processing 12 homolog OS=Bos taurus OX=9913 GN=RRP12 PE=4 SV=1
F1N7G0	Heterogeneous nuclear ribonucleoprotein L like OS=Bos taurus OX=9913 GN=HNRNPLL PE=4 SV=2
F1MF76	Uncharacterized protein OS=Bos taurus OX=9913 GN=LOC515570 PE=4 SV=2
A0A3Q1M483	Acetyl-CoA carboxylase 1 OS=Bos taurus OX=9913 GN=ACACA PE=4 SV=1
Q2T9V5	tRNA (adenine(58)-N(1))-methyltransferase non-catalytic subunit TRM6 OS=Bos taurus OX=9913 GN=TRMT6 PE=2 SV=1
F1N036	DnaJ homolog subfamily C member 3 OS=Bos taurus OX=9913 GN=DNAJC3 PE=4 SV=1
Q3ZC53	RWD domain containing 1 OS=Bos taurus OX=9913 GN=RWDD1 PE=2 SV=1
A2VDW9	Zinc finger protein Aiolos OS=Bos taurus OX=9913 GN=IKZF3 PE=2 SV=1
E1BC85	THADA armadillo repeat containing OS=Bos taurus OX=9913 GN=THADA PE=4 SV=3
E1BP86	N(alpha)-acetyltransferase 38, NatC auxiliary subunit OS=Bos taurus OX=9913 GN=NAA38 PE=4 SV=1
E1BHL0	CCR4-NOT transcription complex subunit 11 OS=Bos taurus OX=9913 GN=CNOT11 PE=4 SV=1
A7E375	LOC514234 protein (Fragment) OS=Bos taurus OX=9913 GN=LOC514234 PE=2 SV=1
Q29RV1	Protein disulfide-isomerase A4 OS=Bos taurus OX=9913 GN=PDIA4 PE=2 SV=1
P48427	Tubulin-specific chaperone A OS=Bos taurus OX=9913 GN=TBCA PE=1 SV=3
O77784	Isocitrate dehydrogenase [NAD] subunit beta, mitochondrial OS=Bos taurus OX=9913 GN=IDH3B PE=2 SV=2
G3X842	GB1/RHD3-type G domain-containing protein OS=Bos taurus OX=9913 GN=LOC507055 PE=4 SV=2
A3KMX6	UBR7 protein OS=Bos taurus OX=9913 GN=UBR7 PE=2 SV=1
Q3ZBJ1	Nuclear cap-binding protein subunit 2 OS=Bos taurus OX=9913 GN=NCBP2 PE=2 SV=1
Q2HJ93	PHD finger protein 11 OS=Bos taurus OX=9913 GN=PHF11 PE=2 SV=1
A0A3Q1MLB6	UBIQUITIN_CONJUGAT_2 domain-containing protein OS=Bos taurus OX=9913 GN=UBE2R2 PE=3 SV=1
E1BG57	Uncharacterized protein OS=Bos taurus OX=9913 GN=LOC518768 PE=4 SV=2
P32007	ADP/ATP translocase 3 OS=Bos taurus OX=9913 GN=SLC25A6 PE=1 SV=3
Q9GMB8	Serine--tRNA ligase, cytoplasmic OS=Bos taurus OX=9913 GN=SARS1 PE=2 SV=3
F1N6Z0	26S proteasome non-ATPase regulatory subunit 5 OS=Bos taurus OX=9913 GN=PSMD5 PE=4 SV=2
F2Z4C6	Eukaryotic translation initiation factor 4 gamma 2 OS=Bos taurus OX=9913 GN=EIF4G2 PE=4 SV=1
Q5E9E6	60S ribosomal protein L10a OS=Bos taurus OX=9913 GN=RPL10A PE=2 SV=3
F1MUT6	Uncharacterized protein OS=Bos taurus OX=9913 GN=DDX19B PE=4 SV=1
F1N0M0	Tripeptidyl-peptidase 2 OS=Bos taurus OX=9913 GN=TPP2 PE=4 SV=1
Q3T030	26S proteasome regulatory subunit 6B OS=Bos taurus OX=9913 GN=PSMC4 PE=2 SV=1
C0KTL0	Eif2s3y (Fragment) OS=Bos taurus OX=9913 PE=2 SV=1
Q0P5L6	ZW10, kinetochore associated, homolog (Drosophila) OS=Bos taurus OX=9913 GN=ZW10 PE=2 SV=1
F1MCK7	WD repeat domain 43 OS=Bos taurus OX=9913 GN=WDR43 PE=4 SV=2
A0A3Q1M1J3	Replication factor C subunit 4 OS=Bos taurus OX=9913 GN=RFC4 PE=4 SV=1
Q29RM3	Receptor expression-enhancing protein 5 OS=Bos taurus OX=9913 GN=REEP5 PE=2 SV=1
F1MJB1	Deoxythymidylate kinase OS=Bos taurus OX=9913 GN=DTYMK PE=3 SV=1
Q3ZC50	Coiled-coil domain-containing protein 47 OS=Bos taurus OX=9913 GN=CCDC47 PE=2 SV=1
E1BDS6	Tumor protein p53 binding protein 1 OS=Bos taurus OX=9913 GN=TP53BP1 PE=4 SV=2
A0A3Q1MAR8	UBIQUITIN_CONJUGAT_2 domain-containing protein OS=Bos taurus OX=9913 GN=UBE2E1 PE=3 SV=1
Q5EA76	Integrator complex subunit 14 OS=Bos taurus OX=9913 GN=INTS14 PE=2 SV=1
F1N498	28S ribosomal protein S11, mitochondrial OS=Bos taurus OX=9913 GN=MRPS11 PE=3 SV=1
A4FUC4	NKRF protein OS=Bos taurus OX=9913 GN=NKRF PE=2 SV=1
Q3SYW6	Eukaryotic translation initiation factor 3 subunit C OS=Bos taurus OX=9913 GN=EIF3C PE=2 SV=1
A0A3Q1N855	Cysteinyl-tRNA synthetase OS=Bos taurus OX=9913 GN=CARS1 PE=1 SV=1
A4FUZ3	Proteasome (Prosome, macropain) 26S subunit, ATPase, 1 OS=Bos taurus OX=9913 GN=PSMC1 PE=1 SV=1
Q3T102	Eukaryotic translation initiation factor 3 subunit E OS=Bos taurus OX=9913 GN=EIF3E PE=2 SV=1
E1BMM0	Nuclear cap binding protein subunit 1 OS=Bos taurus OX=9913 GN=NCBP1 PE=4 SV=3
Q3T0W9	60S ribosomal protein L19 OS=Bos taurus OX=9913 GN=RPL19 PE=2 SV=1
Q58DM9	Ribosomal protein L27a OS=Bos taurus OX=9913 GN=RPL27A PE=2 SV=1
G3N0H4	SWI/SNF related, matrix associated, actin dependent regulator of chromatin subfamily c member 1 OS=Bos taurus OX=9913 GN=SMARCC1 PE=4 SV=2
A5D9H4	Chromatin assembly factor 1 subunit B OS=Bos taurus OX=9913 GN=CHAF1B PE=2 SV=1
F1N0S9	Family with sequence similarity 98 member A OS=Bos taurus OX=9913 GN=FAM98A PE=4 SV=3
A4IFL0	Mitochondrial import inner membrane translocase subunit Tim23 OS=Bos taurus OX=9913 GN=TIMM23 PE=2 SV=1
F1N0U5	TNF receptor superfamily member 8 OS=Bos taurus OX=9913 GN=TNFRSF8 PE=4 SV=2
A6H7J2	Active regulator of SIRT1 OS=Bos taurus OX=9913 GN=RPS19BP1 PE=2 SV=1
E1BKQ2	RAB11 family interacting protein 1 OS=Bos taurus OX=9913 GN=RAB11FIP1 PE=4 SV=2
F1N091	Coiled-coil domain containing 6 OS=Bos taurus OX=9913 GN=CCDC6 PE=4 SV=2
F1N545	Ankyrin repeat domain 13A OS=Bos taurus OX=9913 GN=ANKRD13A PE=4 SV=3
A0A3Q1LH73	Basic leucine zipper ATF-like transcription factor 3 OS=Bos taurus OX=9913 GN=BATF3 PE=4 SV=1
Q3ZBN4	CUE domain-containing protein 2 OS=Bos taurus OX=9913 GN=CUEDC2 PE=2 SV=1
G3X757	Transitional endoplasmic reticulum ATPase OS=Bos taurus OX=9913 GN=VCP PE=3 SV=1
A0A3Q1MQS3	14-3-3 protein theta OS=Bos taurus OX=9913 GN=YWHAQ PE=1 SV=1
P17248	Tryptophan--tRNA ligase, cytoplasmic OS=Bos taurus OX=9913 GN=WARS1 PE=1 SV=3
Q07130	UTP--glucose-1-phosphate uridylyltransferase OS=Bos taurus OX=9913 GN=UGP2 PE=1 SV=2
Q3T0R1	40S ribosomal protein S18 OS=Bos taurus OX=9913 GN=RPS18 PE=2 SV=3
Q08DS6	Lymphocyte cytosolic protein 2 OS=Bos taurus OX=9913 GN=LCP2 PE=2 SV=1
A0A3Q1MRD9	Eukaryotic translation initiation factor 4B OS=Bos taurus OX=9913 GN=EIF4B PE=1 SV=1
E1B844	Mitochondrial import inner membrane translocase subunit TIM44 OS=Bos taurus OX=9913 GN=TIMM44 PE=3 SV=2
F1MKB7	Uncharacterized protein OS=Bos taurus OX=9913 GN=GSTO1 PE=3 SV=3
Q3ZBW8	SAM domain, SH3 domain and nuclear localization signals 1 OS=Bos taurus OX=9913 GN=SAMSN1 PE=2 SV=1
Q17Q89	Prefoldin subunit 6 OS=Bos taurus OX=9913 GN=PFDN6 PE=2 SV=1
Q32PI3	Replication factor C (Activator 1) 5, 36.5kDa OS=Bos taurus OX=9913 GN=RFC5 PE=2 SV=1
Q02337	D-beta-hydroxybutyrate dehydrogenase, mitochondrial OS=Bos taurus OX=9913 GN=BDH1 PE=1 SV=2
A7MB12	U3 small nucleolar RNA-associated protein 15 homolog OS=Bos taurus OX=9913 GN=UTP15 PE=2 SV=1
F1MPS0	Condensin-2 complex subunit D3 OS=Bos taurus OX=9913 GN=NCAPD3 PE=4 SV=2
E1BG95	Upstream binding protein 1 OS=Bos taurus OX=9913 GN=UBP1 PE=4 SV=2
E1B9N7	ATP-dependent RNA helicase DHX29 OS=Bos taurus OX=9913 GN=DHX29 PE=3 SV=2
A6QNY4	STAU1 protein (Fragment) OS=Bos taurus OX=9913 GN=STAU1 PE=2 SV=1
A1A4P9	Coiled-coil domain-containing protein 167 OS=Bos taurus OX=9913 GN=CCDC167 PE=4 SV=1
P79103	40S ribosomal protein S4 OS=Bos taurus OX=9913 GN=RPS4 PE=2 SV=3
P61284	60S ribosomal protein L12 OS=Bos taurus OX=9913 GN=RPL12 PE=2 SV=1
Q5E949	HMT1 hnRNP methyltransferase-like 2 isoform 3 OS=Bos taurus OX=9913 GN=HRMT1L2 PE=2 SV=1
Q862I1	60S ribosomal protein L24 OS=Bos taurus OX=9913 GN=RPL24 PE=2 SV=2
A7YY52	CD4 molecule OS=Bos taurus OX=9913 GN=CD4 PE=2 SV=1
P04973	Clathrin light chain A OS=Bos taurus OX=9913 GN=CLTA PE=1 SV=1
A0A3Q1ME43	G protein pathway suppressor 1 OS=Bos taurus OX=9913 GN=GPS1 PE=4 SV=1
Q8HYI9	Prefoldin subunit 5 OS=Bos taurus OX=9913 GN=PFDN5 PE=2 SV=1
E1BD67	Serum amyloid A like 1 OS=Bos taurus OX=9913 GN=SAAL1 PE=4 SV=1
Q2KHX8	RNA 3'-terminal phosphate cyclase-like protein OS=Bos taurus OX=9913 GN=RCL1 PE=2 SV=1
Q2TBK2	39S ribosomal protein L9, mitochondrial OS=Bos taurus OX=9913 GN=MRPL9 PE=1 SV=2
P40682	V-type proton ATPase subunit S1 OS=Bos taurus OX=9913 GN=ATP6AP1 PE=1 SV=1
A7E3T2	DNA polymerase delta interacting protein 2 (Fragment) OS=Bos taurus OX=9913 GN=POLDIP2 PE=2 SV=1
E1B7R4	Eukaryotic translation initiation factor 3 subunit A OS=Bos taurus OX=9913 GN=EIF3A PE=3 SV=3
Q2KJG3	Asparagine--tRNA ligase, cytoplasmic OS=Bos taurus OX=9913 GN=NARS PE=2 SV=3
A5D7C4	TNPO3 protein OS=Bos taurus OX=9913 GN=TNPO3 PE=2 SV=1
Q0VCD2	Tubulin gamma-1 chain OS=Bos taurus OX=9913 GN=TUBG1 PE=2 SV=1
Q3ZBU2	CDGSH iron-sulfur domain-containing protein 1 OS=Bos taurus OX=9913 GN=CISD1 PE=1 SV=1
Q2HJF6	Steroid receptor RNA activator 1 OS=Bos taurus OX=9913 GN=SRA1 PE=2 SV=1
F1N6C2	Transmembrane p24 trafficking protein 4 OS=Bos taurus OX=9913 GN=TMED4 PE=3 SV=2
G1K1U4	DNA polymerase delta subunit 3 OS=Bos taurus OX=9913 GN=POLD3 PE=4 SV=2
Q9GKI7	Ceramide transfer protein OS=Bos taurus OX=9913 GN=CERT1 PE=2 SV=1
Q2TBX4	Heat shock 70 kDa protein 13 OS=Bos taurus OX=9913 GN=HSPA13 PE=2 SV=1
E1BC37	G-patch domain containing 8 OS=Bos taurus OX=9913 GN=GPATCH8 PE=4 SV=3
F1N7B6	Uncharacterized protein OS=Bos taurus OX=9913 GN=PYURF PE=3 SV=1
F1MDN4	60S acidic ribosomal protein P0 OS=Bos taurus OX=9913 GN=RPLP0 PE=3 SV=2
A0A452DJ23	Ribosomal_L23eN domain-containing protein OS=Bos taurus OX=9913 PE=3 SV=1
Q3MHP5	Developmentally-regulated GTP-binding protein 1 OS=Bos taurus OX=9913 GN=DRG1 PE=2 SV=1
Q3SYU1	Nucleolar complex protein 2 homolog OS=Bos taurus OX=9913 GN=NOC2L PE=2 SV=1
P12378	UDP-glucose 6-dehydrogenase OS=Bos taurus OX=9913 GN=UGDH PE=1 SV=2
Q08DV2	Glucosamine 6-phosphate N-acetyltransferase OS=Bos taurus OX=9913 GN=GNPNAT1 PE=2 SV=1
A5D7C1	Probable ATP-dependent RNA helicase DDX52 OS=Bos taurus OX=9913 GN=DDX52 PE=2 SV=1
Q2KHZ5	U3 small nucleolar ribonucleoprotein protein MPP10 OS=Bos taurus OX=9913 GN=MPHOSPH10 PE=2 SV=1
A0A3Q1LZ97	Cbl proto-oncogene B OS=Bos taurus OX=9913 GN=CBLB PE=4 SV=1
A0A3Q1MLQ1	Mediator of RNA polymerase II transcription subunit 6 OS=Bos taurus OX=9913 GN=MED6 PE=3 SV=1
F1MY26	Phosphomevalonate kinase OS=Bos taurus OX=9913 GN=PMVK PE=4 SV=1
G3X686	Selenoprotein O OS=Bos taurus OX=9913 GN=SELENOO PE=3 SV=2
Q5E947	Peroxiredoxin-1 OS=Bos taurus OX=9913 GN=PRDX1 PE=2 SV=1
A7YW98	Arginine--tRNA ligase, cytoplasmic OS=Bos taurus OX=9913 GN=RARS1 PE=2 SV=1
Q5E9F9	26S proteasome regulatory subunit 7 OS=Bos taurus OX=9913 GN=PSMC2 PE=2 SV=3
Q3T0J0	3'-phosphoadenosine 5'-phosphosulfate synthase 1 OS=Bos taurus OX=9913 GN=PAPSS1 PE=2 SV=1
E1BLZ8	Eukaryotic translation initiation factor 3 subunit F OS=Bos taurus OX=9913 GN=EIF3F PE=1 SV=3
A7YW45	Protein arginine N-methyltransferase 5 OS=Bos taurus OX=9913 GN=PRMT5 PE=2 SV=1
Q2NKU4	Calcium regulated heat stable protein 1, 24kDa OS=Bos taurus OX=9913 GN=CARHSP1 PE=1 SV=1
Q9XSJ0	Ubiquitin carboxyl-terminal hydrolase isozyme L5 OS=Bos taurus OX=9913 GN=UCHL5 PE=2 SV=1
E1BGE2	UTP20 small subunit processome component OS=Bos taurus OX=9913 GN=UTP20 PE=4 SV=2
Q0P5F2	Proteasome assembly chaperone 1 OS=Bos taurus OX=9913 GN=PSMG1 PE=2 SV=1
E1BNJ0	Transmembrane protein 33 OS=Bos taurus OX=9913 GN=TMEM33 PE=4 SV=3
A0A3Q1MBF6	Cyclin-T1 OS=Bos taurus OX=9913 GN=CCNT1 PE=3 SV=1
Q2TBR6	Prefoldin subunit 4 OS=Bos taurus OX=9913 GN=PFDN4 PE=2 SV=1
Q2YDI2	Origin recognition complex subunit 4 OS=Bos taurus OX=9913 GN=ORC4 PE=2 SV=1
Q3MI03	Prolyl 3-hydroxylase OGFOD1 OS=Bos taurus OX=9913 GN=OGFOD1 PE=2 SV=2
Q29455	DnaJ homolog subfamily C member 5 OS=Bos taurus OX=9913 GN=DNAJC5 PE=1 SV=1
F1N1K2	Thyroid hormone receptor interactor 4 OS=Bos taurus OX=9913 GN=TRIP4 PE=4 SV=2
A0A3Q1M362	Carbohydrate sulfotransferase OS=Bos taurus OX=9913 GN=CHST12 PE=3 SV=1
Q5BIR6	Mediator of RNA polymerase II transcription subunit 17 OS=Bos taurus OX=9913 GN=MED17 PE=2 SV=1
F8UZU9	40S ribosomal protein SA OS=Bos taurus OX=9913 GN=RPSA PE=2 SV=1
P56701	26S proteasome non-ATPase regulatory subunit 2 OS=Bos taurus OX=9913 GN=PSMD2 PE=1 SV=2
E1BLV6	Valyl-tRNA synthetase OS=Bos taurus OX=9913 GN=VARS1 PE=1 SV=3
A7MBG8	RuvB-like helicase OS=Bos taurus OX=9913 GN=RUVBL1 PE=1 SV=1
Q2KI42	26S proteasome non-ATPase regulatory subunit 11 OS=Bos taurus OX=9913 GN=PSMD11 PE=2 SV=3
A0A3Q1NI20	Mitogen-activated protein kinase kinase kinase kinase 1 OS=Bos taurus OX=9913 GN=MAP4K1 PE=3 SV=1
Q3MHM7	60S ribosomal protein L35 OS=Bos taurus OX=9913 GN=RPL35 PE=2 SV=3
A0A3Q1M3W4	40S ribosomal protein S15 OS=Bos taurus OX=9913 GN=RPS15 PE=1 SV=1
A0JN78	HEAT repeat containing 3 OS=Bos taurus OX=9913 GN=HEATR3 PE=2 SV=1
A7MB41	DNA-binding protein SATB OS=Bos taurus OX=9913 GN=SATB1 PE=2 SV=1
Q2KI86	Replication protein A2 OS=Bos taurus OX=9913 GN=RPA2 PE=2 SV=1
Q5E9I7	Methylosome protein 50 OS=Bos taurus OX=9913 GN=WDR77 PE=2 SV=1
A0A3Q1M9C8	A-kinase anchoring protein 8 OS=Bos taurus OX=9913 GN=AKAP8 PE=3 SV=1
A0JN63	Cleavage stimulation factor subunit 1 OS=Bos taurus OX=9913 GN=CSTF1 PE=2 SV=1
Q29RZ9	WD repeat-containing protein 92 OS=Bos taurus OX=9913 GN=WDR92 PE=2 SV=1
A0A3Q1LNZ7	Rho/Rac guanine nucleotide exchange factor 2 OS=Bos taurus OX=9913 GN=ARHGEF2 PE=4 SV=1
A0A3Q1M4Y9	Ubiquitin carboxyl-terminal hydrolase OS=Bos taurus OX=9913 GN=USP15 PE=3 SV=1
F1MVP8	2-hydroxyacyl-CoA lyase 1 OS=Bos taurus OX=9913 GN=HACL1 PE=1 SV=3
E2GEZ2	Translocase of outer mitochondrial membrane 40A OS=Bos taurus OX=9913 GN=Tom40A PE=2 SV=1
E1BJG3	Gem nuclear organelle associated protein 5 OS=Bos taurus OX=9913 GN=GEMIN5 PE=4 SV=3
F1N1H2	Microtubule-associated protein 1S OS=Bos taurus OX=9913 GN=MAP1S PE=4 SV=2
Q3SYV3	Mitochondrial inner membrane protein OXA1L OS=Bos taurus OX=9913 GN=OXA1L PE=2 SV=1
Q3SZD1	Peroxisomal biogenesis factor 19 OS=Bos taurus OX=9913 GN=PEX19 PE=2 SV=1
A0A1D8QLT6	Inner centromere protein isoform OS=Bos taurus OX=9913 PE=2 SV=1
G8JKZ3	DNA primase OS=Bos taurus OX=9913 GN=PRIM1 PE=3 SV=1
Q32PA9	Peptidyl-prolyl cis-trans isomerase FKBP2 OS=Bos taurus OX=9913 GN=FKBP2 PE=2 SV=1
A0A3Q1M8H3	Pentatricopeptide repeat domain-containing protein 3, mitochondrial OS=Bos taurus OX=9913 GN=PTCD3 PE=4 SV=1
F1N3V0	Malic enzyme OS=Bos taurus OX=9913 GN=ME1 PE=3 SV=3
A6QLH6	N-terminal kinase-like protein OS=Bos taurus OX=9913 GN=SCYL1 PE=2 SV=1
O19137	Cleavage and polyadenylation specificity factor subunit 4 OS=Bos taurus OX=9913 GN=CPSF4 PE=1 SV=1
E1BCQ3	Coiled-coil domain containing 88C OS=Bos taurus OX=9913 GN=CCDC88C PE=4 SV=2
F1MHD7	Protein YIPF OS=Bos taurus OX=9913 GN=YIPF4 PE=3 SV=3
Q95477	MHC class I antigen OS=Bos taurus OX=9913 GN=LA-A11 PE=1 SV=1
A0A3Q1M9U0	Calcium-transporting ATPase OS=Bos taurus OX=9913 GN=ATP2A2 PE=1 SV=1
A0A3Q1LMQ9	Transportin-1 OS=Bos taurus OX=9913 GN=TNPO1 PE=4 SV=1
Q2KJ25	26S proteasome non-ATPase regulatory subunit 12 OS=Bos taurus OX=9913 GN=PSMD12 PE=2 SV=3
A2VE99	Septin-11 OS=Bos taurus OX=9913 GN=SEPTIN11 PE=2 SV=1
A0A452DIU9	Protein transport protein SEC23 OS=Bos taurus OX=9913 GN=SEC23B PE=3 SV=1
P79126	Protein phosphatase 1G OS=Bos taurus OX=9913 GN=PPM1G PE=2 SV=2
Q3SZC1	GrpE protein homolog 1, mitochondrial OS=Bos taurus OX=9913 GN=GRPEL1 PE=1 SV=1
F1MYH8	26S proteasome non-ATPase regulatory subunit 8 OS=Bos taurus OX=9913 GN=PSMD8 PE=4 SV=1
A5PKJ5	UNC45A protein OS=Bos taurus OX=9913 GN=UNC45A PE=2 SV=1
Q58DF9	Inducible T-cell costimulator OS=Bos taurus OX=9913 GN=ICOS PE=2 SV=1
Q2KJJ5	Transducin beta-like protein 3 OS=Bos taurus OX=9913 GN=TBL3 PE=2 SV=1
A5PKD1	NOP14 nucleolar protein OS=Bos taurus OX=9913 GN=NOP14 PE=2 SV=1
F1MB84	Glyoxylate and hydroxypyruvate reductase OS=Bos taurus OX=9913 GN=GRHPR PE=1 SV=2
A0A3Q1MKB9	39S ribosomal protein L3, mitochondrial OS=Bos taurus OX=9913 GN=MRPL3 PE=3 SV=1
A0A3Q1N0C8	ADP ribosylation factor guanine nucleotide exchange factor 2 OS=Bos taurus OX=9913 GN=ARFGEF2 PE=4 SV=1
Q24K00	Cytosolic Fe-S cluster assembly factor NUBP1 OS=Bos taurus OX=9913 GN=NUBP1 PE=2 SV=1
F1MRB9	RRM domain-containing protein OS=Bos taurus OX=9913 GN=NOL8 PE=4 SV=3
F6QVL1	CD3e molecule associated protein OS=Bos taurus OX=9913 GN=CD3EAP PE=4 SV=1
F1N4N1	Thyroid hormone receptor interactor 11 OS=Bos taurus OX=9913 GN=TRIP11 PE=4 SV=3
F1MRT3	Protein regulator of cytokinesis 1 OS=Bos taurus OX=9913 GN=PRC1 PE=4 SV=3
F2Z4C1	Tubulin alpha chain OS=Bos taurus OX=9913 GN=TUBA1A PE=3 SV=1
Q5E9A3	Poly(rC)-binding protein 1 OS=Bos taurus OX=9913 GN=PCBP1 PE=2 SV=1
Q56JX3	60S ribosomal protein L31 OS=Bos taurus OX=9913 GN=RPL31 PE=2 SV=1
P31404	V-type proton ATPase catalytic subunit A OS=Bos taurus OX=9913 GN=ATP6V1A PE=2 SV=2
Q0IIF7	Ubiquitin carboxyl-terminal hydrolase 14 OS=Bos taurus OX=9913 GN=USP14 PE=2 SV=3
P26884	Peptidyl-prolyl cis-trans isomerase FKBP3 OS=Bos taurus OX=9913 GN=FKBP3 PE=1 SV=2
Q05B83	Replication factor C subunit 2 OS=Bos taurus OX=9913 GN=RFC2 PE=2 SV=1
A0A3Q1MAR5	Chromodomain helicase DNA binding protein 1 OS=Bos taurus OX=9913 GN=CHD1 PE=4 SV=1
Q08DN9	Poly (ADP-ribose) polymerase family, member 9 OS=Bos taurus OX=9913 GN=PARP9 PE=2 SV=1
Q17QN6	55 kDa erythrocyte membrane protein OS=Bos taurus OX=9913 GN=MPP1 PE=1 SV=1
Q95ML6	Calcium-transporting ATPase OS=Bos taurus OX=9913 PE=2 SV=1
F1N0J0	ATP-dependent RNA helicase DHX30 OS=Bos taurus OX=9913 GN=DHX30 PE=4 SV=2
A6QLS0	DNA-directed RNA polymerase subunit beta OS=Bos taurus OX=9913 GN=POLR1B PE=2 SV=1
A0A452DIQ1	Gamma-soluble NSF attachment protein OS=Bos taurus OX=9913 GN=NAPG PE=4 SV=1
Q148J7	BCL2 associated athanogene 1 OS=Bos taurus OX=9913 GN=BAG1 PE=2 SV=1
Q08D83	Reticulon-3 OS=Bos taurus OX=9913 GN=RTN3 PE=2 SV=1
A0A3S5ZPS0	Interleukin-2 receptor subunit alpha OS=Bos taurus OX=9913 GN=IL2RA PE=4 SV=1
A0A3Q1MUU1	Euchromatic histone lysine methyltransferase 1 OS=Bos taurus OX=9913 GN=EHMT1 PE=4 SV=1
A5D7A6	U3 small nucleolar RNA-associated protein 11 OS=Bos taurus OX=9913 GN=UTP11L PE=2 SV=1
F1MD44	Rieske domain-containing protein OS=Bos taurus OX=9913 GN=LOC537017 PE=4 SV=3
F1MN93	DNA topoisomerase I OS=Bos taurus OX=9913 GN=TOP1 PE=3 SV=2
F1MDU9	HEAT repeat containing 1 OS=Bos taurus OX=9913 GN=HEATR1 PE=4 SV=3
A0A3Q1LSF9	40S ribosomal protein S12 OS=Bos taurus OX=9913 GN=RPS12 PE=3 SV=1
A0A3Q1LSA3	Probable ATP-dependent RNA helicase DDX47 OS=Bos taurus OX=9913 GN=DDX47 PE=1 SV=1
Q3SZ25	Polycomb protein EED OS=Bos taurus OX=9913 GN=EED PE=2 SV=1
A4FUE2	ABCF3 protein OS=Bos taurus OX=9913 GN=ABCF3 PE=2 SV=1
A0A3Q1LL49	MRG domain-containing protein OS=Bos taurus OX=9913 GN=MORF4L1 PE=4 SV=1
F1MDN8	Nucleolar GTP-binding protein 2 OS=Bos taurus OX=9913 GN=GNL2 PE=3 SV=1
A4FV18	GEM interacting protein OS=Bos taurus OX=9913 GN=GMIP PE=2 SV=1
A0A2Z4N3M8	MHC class II antigen (Fragment) OS=Bos taurus OX=9913 GN=DRB3 PE=4 SV=1
A6QLS4	NDE1 protein OS=Bos taurus OX=9913 GN=NDE1 PE=2 SV=1
A1A4R8	Cell division cycle protein 23 homolog OS=Bos taurus OX=9913 GN=CDC23 PE=2 SV=1
F1MJT0	N(alpha)-acetyltransferase 35, NatC auxiliary subunit OS=Bos taurus OX=9913 GN=NAA35 PE=4 SV=2
Q3SX23	Lon protease homolog 2, peroxisomal OS=Bos taurus OX=9913 GN=LONP2 PE=2 SV=1
Q5E9A9	DET1- and DDB1-associated protein 1 OS=Bos taurus OX=9913 GN=DDA1 PE=3 SV=1
A0A3Q1MW87	Transcription factor jun-D OS=Bos taurus OX=9913 GN=JUND PE=3 SV=1
Q95142	Retinal rod rhodopsin-sensitive cGMP 3',5'-cyclic phosphodiesterase subunit delta OS=Bos taurus OX=9913 GN=PDE6D PE=1 SV=1
A0A3Q1LVN1	Armadillo like helical domain containing 3 OS=Bos taurus OX=9913 GN=ARMH3 PE=4 SV=1
Q2HJF5	Diphthine--ammonia ligase OS=Bos taurus OX=9913 GN=DPH6 PE=2 SV=1
P62261	14-3-3 protein epsilon OS=Bos taurus OX=9913 GN=YWHAE PE=2 SV=1
Q3T0F4	40S ribosomal protein S10 OS=Bos taurus OX=9913 GN=RPS10 PE=2 SV=1
P48818	Very long-chain specific acyl-CoA dehydrogenase, mitochondrial OS=Bos taurus OX=9913 GN=ACADVL PE=2 SV=3
Q59A32	Trifunctional purine biosynthetic protein adenosine-3 OS=Bos taurus OX=9913 GN=GART PE=2 SV=1
P61287	Serine/threonine-protein phosphatase PP1-gamma catalytic subunit OS=Bos taurus OX=9913 GN=PPP1CC PE=2 SV=1
F2Z4J5	Eukaryotic translation initiation factor 3 subunit G OS=Bos taurus OX=9913 GN=EIF3G PE=3 SV=1
Q5E966	Eukaryotic translation initiation factor 3 subunit I OS=Bos taurus OX=9913 GN=EIF3I PE=2 SV=1
Q32PB8	40S ribosomal protein S21 OS=Bos taurus OX=9913 GN=RPS21 PE=3 SV=1
F1N7C5	Indoleamine 2,3-dioxygenase 1 OS=Bos taurus OX=9913 GN=IDO1 PE=4 SV=2
Q3SZ94	ACP1 protein OS=Bos taurus OX=9913 GN=ACP1 PE=2 SV=1
P35604	Coatomer subunit zeta-1 OS=Bos taurus OX=9913 GN=COPZ1 PE=1 SV=2
F1MZA7	URB1 ribosome biogenesis 1 homolog (S. cerevisiae) OS=Bos taurus OX=9913 GN=URB1 PE=4 SV=3
A0A3Q1MU14	Trafficking protein particle complex subunit OS=Bos taurus OX=9913 GN=TRAPPC3 PE=3 SV=1
A0A3Q1MM38	Nefa_Nip30_N domain-containing protein OS=Bos taurus OX=9913 PE=4 SV=1
A0A3Q1LVX0	Uncharacterized protein OS=Bos taurus OX=9913 GN=GOLGA2 PE=4 SV=1
A0A3Q1LKM4	Ankyrin repeat and LEM domain containing 2 OS=Bos taurus OX=9913 GN=ANKLE2 PE=4 SV=1
E1BH71	Deltex E3 ubiquitin ligase 3L OS=Bos taurus OX=9913 GN=DTX3L PE=4 SV=1
F1MZW1	28S ribosomal protein S23, mitochondrial OS=Bos taurus OX=9913 GN=MRPS23 PE=4 SV=1
Q29RT5	RNA binding motif protein 19 OS=Bos taurus OX=9913 GN=RBM19 PE=2 SV=1
A7YWA1	TWIST neighbor OS=Bos taurus OX=9913 GN=TWISTNB PE=2 SV=1
G3N0C3	Uncharacterized protein OS=Bos taurus OX=9913 GN=PPP1R14B PE=1 SV=2
Q5J7T6	MHC class II antigen (Fragment) OS=Bos taurus OX=9913 GN=BoLA-DQB PE=4 SV=1
A0A3Q1MJ00	SECIS binding protein 2 OS=Bos taurus OX=9913 GN=SECISBP2 PE=4 SV=1
F1MWW9	Cell division cycle associated 5 OS=Bos taurus OX=9913 GN=CDCA5 PE=4 SV=2
Q3T054	GTP-binding nuclear protein Ran OS=Bos taurus OX=9913 GN=RAN PE=2 SV=3
A6QLU1	Glycerol-3-phosphate dehydrogenase, mitochondrial OS=Bos taurus OX=9913 GN=GPD2 PE=2 SV=1
Q5E964	26S proteasome non-ATPase regulatory subunit 13 OS=Bos taurus OX=9913 GN=PSMD13 PE=2 SV=1
A6QQT5	FACT complex subunit SSRP1 OS=Bos taurus OX=9913 GN=SSRP1 PE=2 SV=1
P68399	Casein kinase II subunit alpha OS=Bos taurus OX=9913 GN=CSNK2A1 PE=1 SV=1
A7Z055	PLAA protein OS=Bos taurus OX=9913 GN=PLAA PE=2 SV=1
F1N719	Serine/threonine-protein phosphatase OS=Bos taurus OX=9913 GN=PPP5C PE=3 SV=1
N0E640	Casein kinase II subunit beta OS=Bos taurus OX=9913 GN=Csnk2b-Ly6g5b PE=2 SV=1
E1BIE7	PGAM family member 5, mitochondrial serine/threonine protein phosphatase OS=Bos taurus OX=9913 GN=PGAM5 PE=4 SV=1
Q2KII4	Elongin-C OS=Bos taurus OX=9913 GN=ELOC PE=1 SV=1
Q05B79	ATP-dependent DNA/RNA helicase DHX36 OS=Bos taurus OX=9913 GN=DHX36 PE=1 SV=1
F1MEX9	Acyl-CoA synthetase long chain family member 3 OS=Bos taurus OX=9913 GN=ACSL3 PE=4 SV=3
Q2TBP7	c-Myc-binding protein OS=Bos taurus OX=9913 GN=MYCBP PE=3 SV=3
Q5E9J5	7-dehydrocholesterol reductase OS=Bos taurus OX=9913 GN=DHCR7 PE=2 SV=1
Q28029	V-type proton ATPase subunit F OS=Bos taurus OX=9913 GN=ATP6V1F PE=3 SV=2
A6QQL4	UBFD1 protein OS=Bos taurus OX=9913 GN=UBFD1 PE=1 SV=1
Q32LE4	Gamma-glutamylcyclotransferase OS=Bos taurus OX=9913 GN=GGCT PE=2 SV=1
G5E5S2	Negative elongation factor complex member B OS=Bos taurus OX=9913 GN=NELFB PE=4 SV=2
Q5E9J8	Synembryn-A OS=Bos taurus OX=9913 GN=RIC8A PE=1 SV=1
Q3T075	Syntaxin-8 OS=Bos taurus OX=9913 GN=STX8 PE=2 SV=1
Q32KY6	dCTP pyrophosphatase 1 OS=Bos taurus OX=9913 GN=DCTPP1 PE=2 SV=1
Q28090	CTLA-4 protein OS=Bos taurus OX=9913 GN=CTLA4 PE=1 SV=1
Q08DY2	Mesoderm induction early response 1 homolog (Xenopus laevis) OS=Bos taurus OX=9913 GN=MIER1 PE=2 SV=1
A0A3Q1N1X1	Ubiquitin conjugating enzyme E2 A OS=Bos taurus OX=9913 GN=UBE2A PE=3 SV=1
A0A3Q1LMH1	PAT1 homolog 1, processing body mRNA decay factor OS=Bos taurus OX=9913 GN=PATL1 PE=4 SV=1
Q2HJJ1	39S ribosomal protein L28, mitochondrial OS=Bos taurus OX=9913 GN=MRPL28 PE=1 SV=1
Q95MM6	Signaling lymphocyte activation molecule SLAM OS=Bos taurus OX=9913 PE=2 SV=1
Q08DW5	Centromere protein Q OS=Bos taurus OX=9913 GN=CENPQ PE=2 SV=1
P68002	Voltage-dependent anion-selective channel protein 2 OS=Bos taurus OX=9913 GN=VDAC2 PE=2 SV=2
P67808	Y-box-binding protein 1 OS=Bos taurus OX=9913 GN=YBX1 PE=2 SV=3
Q861S4	Similar to ribosomal protein L21 (Fragment) OS=Bos taurus OX=9913 GN=RPL21 PE=2 SV=1
P26882	Peptidyl-prolyl cis-trans isomerase D OS=Bos taurus OX=9913 GN=PPID PE=1 SV=6
F1MDS3	Phosphoenolpyruvate carboxykinase 2, mitochondrial OS=Bos taurus OX=9913 GN=PCK2 PE=1 SV=1
F6PWM7	Aminoacyl tRNA synthetase complex interacting multifunctional protein 1 OS=Bos taurus OX=9913 GN=AIMP1 PE=1 SV=1
A4IFQ7	Branched-chain-amino-acid aminotransferase OS=Bos taurus OX=9913 GN=BCAT1 PE=2 SV=1
Q17QP9	Proteasome (Prosome, macropain) 26S subunit, non-ATPase, 14 OS=Bos taurus OX=9913 GN=PSMD14 PE=1 SV=1
Q32L22	DNA-directed RNA polymerases I and III subunit RPAC1 OS=Bos taurus OX=9913 GN=POLR1C PE=2 SV=1
A0A3Q1N7V3	Serine/threonine kinase 39 OS=Bos taurus OX=9913 GN=STK39 PE=4 SV=1
A0A3Q1M445	Transmembrane 9 superfamily member OS=Bos taurus OX=9913 GN=TM9SF4 PE=3 SV=1
Q3T0K6	EBNA1 binding protein 2 OS=Bos taurus OX=9913 GN=EBNA1BP2 PE=2 SV=1
A0A3Q1N752	Pericentriolar material 1 OS=Bos taurus OX=9913 GN=PCM1 PE=4 SV=1
A0A3Q1N814	Family with sequence similarity 114 member A2 OS=Bos taurus OX=9913 GN=FAM114A2 PE=4 SV=1
Q3MHI4	Phosphorylated adapter RNA export protein OS=Bos taurus OX=9913 GN=PHAX PE=2 SV=2
Q0VC06	Protein LTV1 homolog OS=Bos taurus OX=9913 GN=LTV1 PE=2 SV=1
A0A3Q1MCQ8	Ribonuclease P protein subunit p30 OS=Bos taurus OX=9913 GN=RPP30 PE=4 SV=1
Q3ZCI0	Coiled-coil-helix-coiled-coil-helix domain containing 9 OS=Bos taurus OX=9913 GN=CHCHD9 PE=1 SV=1
Q3MHW6	Monocarboxylate transporter 1 OS=Bos taurus OX=9913 GN=SLC16A1 PE=2 SV=2
F1MN91	Mitochondrial mRNA pseudouridine synthase RPUSD3 OS=Bos taurus OX=9913 GN=RPUSD3 PE=4 SV=1
P14769	N-acetyllactosaminide alpha-1,3-galactosyltransferase OS=Bos taurus OX=9913 GN=GGTA1 PE=1 SV=1
A4FV47	CDC45L protein OS=Bos taurus OX=9913 GN=CDC45 PE=2 SV=1
F1MJ58	Epithelial cell transforming 2 OS=Bos taurus OX=9913 GN=ECT2 PE=4 SV=2
A0A3Q1MST6	DNA topoisomerase II binding protein 1 OS=Bos taurus OX=9913 GN=TOPBP1 PE=4 SV=1
Q29S16	Protein Abitram OS=Bos taurus OX=9913 GN=ABITRAM PE=2 SV=1
Q3T057	60S ribosomal protein L23 OS=Bos taurus OX=9913 GN=RPL23 PE=2 SV=2
Q56JU9	40S ribosomal protein S24 OS=Bos taurus OX=9913 GN=RPS24 PE=2 SV=2
A7YWC4	ATPase family AAA domain-containing protein 3 OS=Bos taurus OX=9913 GN=ATAD3 PE=2 SV=1
Q2KIK0	Protein SGT1 homolog OS=Bos taurus OX=9913 GN=SUGT1 PE=2 SV=1
Q2KHT7	40S ribosomal protein S27 OS=Bos taurus OX=9913 GN=RPS27 PE=3 SV=3
Q862M6	Similar to prefoldin subunit 2 (Fragment) OS=Bos taurus OX=9913 PE=2 SV=1
F6R1L1	Protein phosphatase 4 regulatory subunit 3A OS=Bos taurus OX=9913 GN=PPP4R3A PE=4 SV=1
F1MI56	Ankyrin repeat domain 17 OS=Bos taurus OX=9913 GN=ANKRD17 PE=4 SV=3
E1BEN4	GDP-mannose pyrophosphorylase A OS=Bos taurus OX=9913 GN=GMPPA PE=1 SV=1
F1N3I3	Ubiquitin conjugating enzyme E2 O OS=Bos taurus OX=9913 GN=UBE2O PE=4 SV=2
Q0P565	HD domain-containing protein 2 OS=Bos taurus OX=9913 GN=HDDC2 PE=2 SV=1
Q148H9	Ribosomal RNA processing 1 OS=Bos taurus OX=9913 GN=RRP1 PE=2 SV=1
Q2KHY2	Vesicle-associated membrane protein 5 OS=Bos taurus OX=9913 GN=VAMP5 PE=3 SV=1
E1BND1	Kin17 DNA and RNA binding protein OS=Bos taurus OX=9913 GN=KIN PE=4 SV=1
A0A3Q1MDG3	Glycerol kinase OS=Bos taurus OX=9913 GN=GK PE=3 SV=1
A0A3Q1LUT3	Adenylate cyclase type 7 OS=Bos taurus OX=9913 GN=ADCY7 PE=3 SV=1
A0A3Q1LMW4	Lysine-rich nucleolar protein 1 OS=Bos taurus OX=9913 GN=KNOP1 PE=4 SV=1
A0A3Q1M0U6	VPS37A subunit of ESCRT-I OS=Bos taurus OX=9913 GN=VPS37A PE=4 SV=1
A0A3Q1M4P1	ATP synthase mitochondrial F1 complex assembly factor 2 OS=Bos taurus OX=9913 GN=ATPAF2 PE=4 SV=1
Q2KIC0	Nuclear speckle splicing regulatory protein 1 OS=Bos taurus OX=9913 GN=NSRP1 PE=2 SV=1
P68509	14-3-3 protein eta OS=Bos taurus OX=9913 GN=YWHAH PE=1 SV=2
A0A3Q1MMW5	60S ribosomal protein L5 OS=Bos taurus OX=9913 GN=RPL5 PE=1 SV=1
A0A3Q1LVS2	Kinectin 1 OS=Bos taurus OX=9913 GN=KTN1 PE=1 SV=1
A7MBG0	Adenylosuccinate synthetase isozyme 2 OS=Bos taurus OX=9913 GN=ADSS2 PE=2 SV=2
F1MYW7	Histocompatibility minor 13 OS=Bos taurus OX=9913 GN=HM13 PE=4 SV=2
P21282	V-type proton ATPase subunit C 1 OS=Bos taurus OX=9913 GN=ATP6V1C1 PE=1 SV=3
A0A3Q1LZ08	Replication timing regulatory factor 1 OS=Bos taurus OX=9913 GN=RIF1 PE=4 SV=1
A2VDN9	KIAA0020 protein OS=Bos taurus OX=9913 GN=PUM3 PE=2 SV=1
Q0V8A9	Mitochondrial import inner membrane translocase subunit TIM50 (Fragment) OS=Bos taurus OX=9913 GN=TIMM50 PE=2 SV=1
Q3MHG1	Serine palmitoyltransferase 1 OS=Bos taurus OX=9913 GN=SPTLC1 PE=2 SV=1
F1MMR8	Nudix hydrolase 5 OS=Bos taurus OX=9913 GN=NUDT5 PE=3 SV=1
Q2YDD0	Heat shock 70 kDa protein 14 OS=Bos taurus OX=9913 GN=HSPA14 PE=2 SV=1
F1MY97	pre-rRNA processing protein FTSJ3 OS=Bos taurus OX=9913 GN=FTSJ3 PE=3 SV=3
F1MZE4	Sperm-associated antigen 7 OS=Bos taurus OX=9913 GN=SPAG7 PE=4 SV=1
F6QCG0	Aladin WD repeat nucleoporin OS=Bos taurus OX=9913 GN=AAAS PE=4 SV=1
Q3SZ29	Polymerase (RNA) I polypeptide E, 53kDa OS=Bos taurus OX=9913 GN=POLR1E PE=2 SV=1
M5FJZ6	DnaJ (Hsp40) homolog, subfamily A, member 3 OS=Bos taurus OX=9913 GN=DNAJA3 PE=3 SV=1
A6QLW1	PIK3R4 protein OS=Bos taurus OX=9913 GN=PIK3R4 PE=2 SV=1
A0A3Q1MQS6	SURF1-like protein OS=Bos taurus OX=9913 GN=SURF1 PE=3 SV=1
G5E5A0	Serine/threonine kinase 17a OS=Bos taurus OX=9913 GN=STK17A PE=3 SV=2
G3MYR9	Histone deacetylase 8 OS=Bos taurus OX=9913 GN=HDAC8 PE=3 SV=2
A0A3Q1LYY3	Proteasomal ATPase-associated factor 1 OS=Bos taurus OX=9913 GN=PAAF1 PE=4 SV=1
A0A3Q1LXW0	Tripartite motif containing 33 OS=Bos taurus OX=9913 GN=TRIM33 PE=4 SV=1
E1BCH4	RNA/RNP complex-1-interacting phosphatase OS=Bos taurus OX=9913 GN=DUSP11 PE=4 SV=1
Q3SZ14	DUSP12 protein (Fragment) OS=Bos taurus OX=9913 GN=DUSP12 PE=2 SV=1
Q5E970	DEAD (Asp-Glu-Ala-Asp) box polypeptide 39 isoform 1 OS=Bos taurus OX=9913 GN=DDX39A PE=2 SV=1
A6QQN2	Tyrosine-protein phosphatase non-receptor type OS=Bos taurus OX=9913 GN=PTPN1 PE=2 SV=1
A0A3Q1N8Q5	10 kDa heat shock protein, mitochondrial OS=Bos taurus OX=9913 GN=HSPE1 PE=1 SV=1
Q05B91	Peptidylprolyl isomerase (Fragment) OS=Bos taurus OX=9913 GN=FKBP8 PE=2 SV=1
A0A3Q1LP63	TIA1 cytotoxic granule associated RNA binding protein OS=Bos taurus OX=9913 GN=TIA1 PE=4 SV=1
E1BNV4	SRSF protein kinase 1 OS=Bos taurus OX=9913 GN=SRPK1 PE=4 SV=3
A7E3W5	Synaptogyrin-2 OS=Bos taurus OX=9913 GN=SYNGR2 PE=2 SV=1
Q5E9K2	Mediator of RNA polymerase II transcription subunit 22 OS=Bos taurus OX=9913 GN=MED22 PE=2 SV=1
A6H7F6	Golgi phosphoprotein 3-like OS=Bos taurus OX=9913 GN=GOLPH3L PE=2 SV=1
A0A3Q1MIL7	RAD50 interactor 1 OS=Bos taurus OX=9913 GN=RINT1 PE=4 SV=1
A0A452DKB6	Conserved oligomeric Golgi complex subunit 7 OS=Bos taurus OX=9913 GN=COG7 PE=4 SV=1
A7MBC0	N-acetylglucosamine-6-phosphate deacetylase OS=Bos taurus OX=9913 GN=AMDHD2 PE=2 SV=1
E1B806	Sin3A associated protein 30 OS=Bos taurus OX=9913 GN=SAP30 PE=4 SV=1
F1N048	Peptidyl arginine deiminase 2 OS=Bos taurus OX=9913 GN=PADI2 PE=4 SV=2
Q1JQC5	Regulator of microtubule dynamics protein 3 OS=Bos taurus OX=9913 GN=RMDN3 PE=2 SV=1
F1MYI2	Heterogeneous nuclear ribonucleoprotein M OS=Bos taurus OX=9913 GN=HNRNPM PE=1 SV=3
E1BFV0	Karyopherin subunit beta 1 OS=Bos taurus OX=9913 GN=KPNB1 PE=1 SV=2
A7MBA2	26S proteasome non-ATPase regulatory subunit 1 OS=Bos taurus OX=9913 GN=PSMD1 PE=1 SV=1
A0A140T842	Lon protease homolog, mitochondrial OS=Bos taurus OX=9913 GN=LONP1 PE=3 SV=2
A0A3Q1MYB4	Dynamin-2 OS=Bos taurus OX=9913 GN=DNM2 PE=3 SV=1
Q32PD5	40S ribosomal protein S19 OS=Bos taurus OX=9913 GN=RPS19 PE=2 SV=3
Q3T199	40S ribosomal protein S23 OS=Bos taurus OX=9913 GN=RPS23 PE=2 SV=1
F1MZK0	Glycylpeptide N-tetradecanoyltransferase OS=Bos taurus OX=9913 GN=NMT1 PE=3 SV=1
A0A3Q1MHI5	G3BP stress granule assembly factor 2 OS=Bos taurus OX=9913 GN=G3BP2 PE=1 SV=1
Q32KR9	Charged multivesicular body protein 1A OS=Bos taurus OX=9913 GN=CHMP1A PE=2 SV=1
Q2KJG2	Ubiquitin-fold modifier 1 OS=Bos taurus OX=9913 GN=UFM1 PE=3 SV=1
E1BFR5	Serine/threonine-protein kinase greatwall OS=Bos taurus OX=9913 GN=MASTL PE=3 SV=1
E1BFQ0	AAA domain-containing protein OS=Bos taurus OX=9913 GN=LOC532875 PE=3 SV=3
A5PJ71	MRPL41 protein OS=Bos taurus OX=9913 GN=MRPL41 PE=2 SV=1
E1BG07	CWF19 like cell cycle control factor 1 OS=Bos taurus OX=9913 GN=CWF19L1 PE=4 SV=2
G3N173	Conserved oligomeric Golgi complex subunit 5 OS=Bos taurus OX=9913 GN=COG5 PE=4 SV=2
A7YSY5	DDHD2 protein (Fragment) OS=Bos taurus OX=9913 GN=DDHD2 PE=2 SV=1
P82920	28S ribosomal protein S21, mitochondrial OS=Bos taurus OX=9913 GN=MRPS21 PE=1 SV=3
A0A3Q1LUR1	Surfeit 2 OS=Bos taurus OX=9913 GN=SURF2 PE=4 SV=1
Q2HJI9	Ring-box 1 OS=Bos taurus OX=9913 GN=RBX1 PE=2 SV=1
Q2KJD0	Tubulin beta-5 chain OS=Bos taurus OX=9913 GN=TUBB5 PE=2 SV=1
A6H769	40S ribosomal protein S7 OS=Bos taurus OX=9913 GN=RPS7 PE=2 SV=1
Q3MHL3	Histone-binding protein RBBP4 OS=Bos taurus OX=9913 GN=RBBP4 PE=1 SV=3
F1MM79	Glutaminase OS=Bos taurus OX=9913 GN=GLS PE=3 SV=1
A0A140T832	40S ribosomal protein S17 OS=Bos taurus OX=9913 GN=RPS17 PE=3 SV=2
Q2NL24	Proteasome assembly chaperone 2 OS=Bos taurus OX=9913 GN=PSMG2 PE=2 SV=1
Q1RMH0	C11HXORF26 protein (Fragment) OS=Bos taurus OX=9913 GN=C11HXORF26 PE=2 SV=1
A6QR55	Ubiquitin carboxyl-terminal hydrolase 4 OS=Bos taurus OX=9913 GN=USP4 PE=2 SV=1
F1MKY0	Golgi associated, gamma adaptin ear containing, ARF binding protein 2 OS=Bos taurus OX=9913 GN=GGA2 PE=4 SV=3
A4FV45	Transmembrane protein 214 OS=Bos taurus OX=9913 GN=TMEM214 PE=2 SV=1
G3X6P5	Vacuolar protein sorting-associated protein 29 OS=Bos taurus OX=9913 GN=VPS29 PE=3 SV=2
E1BDX9	Family with sequence similarity 50 member A OS=Bos taurus OX=9913 GN=FAM50A PE=4 SV=1
E1BF68	DEAH-box helicase 16 OS=Bos taurus OX=9913 GN=DHX16 PE=4 SV=1
A0A3S5ZPN0	Methylmalonyl-CoA mutase, mitochondrial OS=Bos taurus OX=9913 GN=MMUT PE=4 SV=1
Q3SZX8	Coiled-coil domain-containing protein 25 OS=Bos taurus OX=9913 GN=CCDC25 PE=2 SV=1
Q56K13	Splicing factor 3B subunit 5 OS=Bos taurus OX=9913 GN=SF3B5 PE=3 SV=1
A0A3Q1MGP4	Chromodomain helicase DNA binding protein 9 OS=Bos taurus OX=9913 GN=CHD9 PE=4 SV=1
Q3MHG0	Conserved oligomeric Golgi complex subunit 4 OS=Bos taurus OX=9913 GN=COG4 PE=2 SV=1
A0A3Q1MIS3	Anaphase promoting complex subunit 5 OS=Bos taurus OX=9913 GN=ANAPC5 PE=4 SV=1
A0A3Q1LX02	Cytochrome P450 20A1 OS=Bos taurus OX=9913 GN=CYP20A1 PE=4 SV=1
F1MG31	Cell division cycle-associated protein 2 OS=Bos taurus OX=9913 GN=CDCA2 PE=4 SV=3
Q3T161	Synapse associated protein 1 OS=Bos taurus OX=9913 GN=SYAP1 PE=2 SV=1
Q5EA29	Bone marrow stromal cell-derived ubiquitin-like protein OS=Bos taurus OX=9913 GN=UBL7 PE=2 SV=1
E1B731	GDT1 family protein OS=Bos taurus OX=9913 GN=TMEM165 PE=3 SV=1
Q3SX30	Proteasome inhibitor PI31 subunit OS=Bos taurus OX=9913 GN=PSMF1 PE=2 SV=2
A6QLL8	Fructose-bisphosphate aldolase OS=Bos taurus OX=9913 GN=ALDOA PE=1 SV=1
Q3ZCK1	Eukaryotic translation initiation factor 3 subunit L OS=Bos taurus OX=9913 GN=EIF3L PE=2 SV=1
A0A3Q1ML77	Cold shock domain containing E1 OS=Bos taurus OX=9913 GN=CSDE1 PE=4 SV=1
A1A4N9	Nucleoside diphosphate kinase OS=Bos taurus OX=9913 GN=NME1 PE=2 SV=1
A7E3S8	Heat shock 70kD protein binding protein OS=Bos taurus OX=9913 GN=ST13 PE=2 SV=1
F1MX38	Signal transducer and activator of transcription OS=Bos taurus OX=9913 GN=STAT3 PE=3 SV=1
F1MZY2	Glutamine--fructose-6-phosphate transaminase 1 OS=Bos taurus OX=9913 GN=GFPT1 PE=1 SV=2
E1BCL5	Uncharacterized protein OS=Bos taurus OX=9913 PE=3 SV=1
A0A3Q1M177	LUC7 like OS=Bos taurus OX=9913 GN=LUC7L PE=4 SV=1
E1BDU8	LIM domain and actin binding 1 OS=Bos taurus OX=9913 GN=LIMA1 PE=1 SV=3
E1BP36	MMS19 nucleotide excision repair protein homolog OS=Bos taurus OX=9913 GN=MMS19 PE=2 SV=3
A6H709	HSPC321 protein OS=Bos taurus OX=9913 GN=SWAP70 PE=2 SV=1
A0A3Q1MEP1	Centrosomal protein 170 OS=Bos taurus OX=9913 GN=CEP170 PE=4 SV=1
E1BPP2	BMS1 ribosome biogenesis factor OS=Bos taurus OX=9913 GN=BMS1 PE=4 SV=2
F1MIU2	BCL2 associated athanogene 3 OS=Bos taurus OX=9913 GN=BAG3 PE=1 SV=1
E1BMX2	tRNA methyltransferase 2 homolog A OS=Bos taurus OX=9913 GN=TRMT2A PE=3 SV=3
Q24K11	AP-3 complex subunit mu-1 OS=Bos taurus OX=9913 GN=AP3M1 PE=2 SV=1
A6QLI8	General transcription factor IIE subunit 1 OS=Bos taurus OX=9913 GN=GTF2E1 PE=2 SV=1
F1MBQ0	Dynein light intermediate chain OS=Bos taurus OX=9913 GN=DYNC1LI2 PE=3 SV=2
A0A3Q1M1V5	Interferon induced protein 44 OS=Bos taurus OX=9913 GN=IFI44 PE=4 SV=1
A0A3Q1MNG4	BRCA2 and CDKN1A-interacting protein OS=Bos taurus OX=9913 GN=BCCIP PE=3 SV=1
Q08DC9	Cell cycle exit and neuronal differentiation 1 OS=Bos taurus OX=9913 GN=CEND1 PE=2 SV=1
E1BJI9	Integrator complex subunit 2 OS=Bos taurus OX=9913 GN=INTS2 PE=4 SV=3
F1MLF9	Ubiquitin-conjugating enzyme E2 E3 OS=Bos taurus OX=9913 GN=UBE2E3 PE=3 SV=2
Q5E9T4	Thiamin pyrophosphokinase 1 OS=Bos taurus OX=9913 GN=TPK1 PE=2 SV=1
F1MW08	Endoplasmic reticulum oxidoreductase 1 beta OS=Bos taurus OX=9913 GN=ERO1B PE=4 SV=3
Q2KHV4	Presenilins-associated rhomboid-like protein, mitochondrial OS=Bos taurus OX=9913 GN=PARL PE=2 SV=1
Q3ZBD7	Glucose-6-phosphate isomerase OS=Bos taurus OX=9913 GN=GPI PE=2 SV=4
A0A3S5ZPM3	6-phosphogluconate dehydrogenase, decarboxylating OS=Bos taurus OX=9913 GN=PGD PE=1 SV=1
Q3ZBV2	ATP-dependent RNA helicase DDX19A OS=Bos taurus OX=9913 GN=DDX19A PE=2 SV=1
Q3MHH4	Glutamine--tRNA ligase OS=Bos taurus OX=9913 GN=QARS1 PE=2 SV=1
A0A3Q1LRQ5	Ecm29 proteasome adaptor and scaffold OS=Bos taurus OX=9913 GN=ECPAS PE=4 SV=1
A0A3Q1N8I6	Phosphatidylinositol binding clathrin assembly protein OS=Bos taurus OX=9913 GN=PICALM PE=1 SV=1
Q864L6	Granulysin/NK-lysin-like protein (Fragment) OS=Bos taurus OX=9913 PE=2 SV=1
A0A3Q1M038	Nuclear pore complex protein OS=Bos taurus OX=9913 GN=NUP107 PE=3 SV=1
F2Z4I5	ADP-ribosylation factor-like protein 8B OS=Bos taurus OX=9913 GN=ARL8B PE=3 SV=1
M5FHP2	Heme oxygenase (Decycling) 2 OS=Bos taurus OX=9913 GN=HMOX2 PE=4 SV=1
Q9TU47	Eukaryotic translation initiation factor 6 OS=Bos taurus OX=9913 GN=EIF6 PE=2 SV=2
Q645M6	FAS-associated death domain protein OS=Bos taurus OX=9913 GN=FADD PE=2 SV=1
F1MIL9	Glucosamine (UDP-N-acetyl)-2-epimerase/N-acetylmannosamine kinase OS=Bos taurus OX=9913 GN=GNE PE=4 SV=3
E1BIQ0	Polyribonucleotide nucleotidyltransferase 1 OS=Bos taurus OX=9913 GN=PNPT1 PE=4 SV=2
G3N251	Centromere protein E OS=Bos taurus OX=9913 GN=CENPE PE=3 SV=2
F2Z4H3	DNA-directed RNA polymerases I, II, and III subunit RPABC3 OS=Bos taurus OX=9913 GN=POLR2H PE=1 SV=1
A5PJF5	BRI3 binding protein OS=Bos taurus OX=9913 GN=BRI3BP PE=2 SV=1
E1BJZ0	Interferon induced with helicase C domain 1 OS=Bos taurus OX=9913 GN=IFIH1 PE=4 SV=2
F1MJS5	HECT domain E3 ubiquitin protein ligase 3 OS=Bos taurus OX=9913 GN=HECTD3 PE=4 SV=1
E1BAF6	Proline rich coiled-coil 2A OS=Bos taurus OX=9913 GN=PRRC2A PE=4 SV=3
Q3T058	Translation initiation factor eIF-2B subunit delta OS=Bos taurus OX=9913 GN=EIF2B4 PE=2 SV=1
Q9TT94	Acyl-CoA desaturase OS=Bos taurus OX=9913 GN=SCD PE=2 SV=2
Q3T0U5	Charged multivesicular body protein 2A OS=Bos taurus OX=9913 GN=CHMP2A PE=2 SV=1
Q3T062	RRP15-like protein OS=Bos taurus OX=9913 GN=RRP15 PE=2 SV=1
Q1JQC8	Chromosome 11 C9orf78 homolog OS=Bos taurus OX=9913 GN=C11H9orf78 PE=2 SV=1
Q2YDE7	Protein archease OS=Bos taurus OX=9913 GN=ZBTB8OS PE=2 SV=2
F1MW97	HGH1 homolog OS=Bos taurus OX=9913 GN=HGH1 PE=4 SV=2
Q1RMM4	SP140 nuclear body protein-like OS=Bos taurus OX=9913 GN=SP140L PE=2 SV=1
A0A452DIV1	39S ribosomal protein L13, mitochondrial OS=Bos taurus OX=9913 GN=MRPL13 PE=3 SV=1
P12234	Phosphate carrier protein, mitochondrial OS=Bos taurus OX=9913 GN=SLC25A3 PE=1 SV=1
A0A3Q1MLP3	Isocitrate dehydrogenase [NAD] subunit, mitochondrial OS=Bos taurus OX=9913 GN=IDH3A PE=3 SV=1
Q3SZM1	MKI67 FHA domain-interacting nucleolar phosphoprotein OS=Bos taurus OX=9913 GN=NIFK PE=2 SV=1
A0A3Q1LP50	La ribonucleoprotein domain family member 7 OS=Bos taurus OX=9913 GN=LARP7 PE=4 SV=1
A0A3Q1NNP6	V-type proton ATPase subunit E 1 OS=Bos taurus OX=9913 GN=ATP6V1E1 PE=1 SV=1
F6R2J7	Protein-histidine N-methyltransferase OS=Bos taurus OX=9913 GN=SETD3 PE=3 SV=2
A5PJS6	Ubiquitin carboxyl-terminal hydrolase 10 OS=Bos taurus OX=9913 GN=USP10 PE=2 SV=1
E1BNH0	WNK lysine deficient protein kinase 2 OS=Bos taurus OX=9913 GN=WNK2 PE=4 SV=3
A0A3Q1LK11	Casein kinase I isoform alpha OS=Bos taurus OX=9913 GN=CSNK1A1 PE=1 SV=1
A0JNA1	Sphingosine-1-phosphate phosphatase 1 OS=Bos taurus OX=9913 GN=SGPP1 PE=2 SV=1
A6QQL9	Signal recognition particle 14 kDa protein OS=Bos taurus OX=9913 GN=SRP14 PE=3 SV=1
F1N671	ADP ribosylation factor like GTPase 6 interacting protein 4 OS=Bos taurus OX=9913 GN=ARL6IP4 PE=4 SV=3
F1MXL8	Trafficking protein particle complex subunit 11 OS=Bos taurus OX=9913 GN=TRAPPC11 PE=4 SV=3
Q3T0C7	Stathmin OS=Bos taurus OX=9913 GN=STMN1 PE=2 SV=3
A0A140T866	D-3-phosphoglycerate dehydrogenase OS=Bos taurus OX=9913 GN=PHGDH PE=1 SV=1
P08166	Adenylate kinase 2, mitochondrial OS=Bos taurus OX=9913 GN=AK2 PE=1 SV=2
Q5EAC6	Hsp90 co-chaperone Cdc37 OS=Bos taurus OX=9913 GN=CDC37 PE=2 SV=1
A0A3Q1MB39	PfkB domain-containing protein OS=Bos taurus OX=9913 GN=ADK PE=1 SV=1
E1BCF8	Zinc finger CCCH-type containing, antiviral 1 OS=Bos taurus OX=9913 GN=ZC3HAV1 PE=4 SV=2
Q3T0B6	Complement component 1 Q subcomponent-binding protein, mitochondrial OS=Bos taurus OX=9913 GN=C1QBP PE=2 SV=1
E1BIN9	Double-strand break repair protein OS=Bos taurus OX=9913 GN=MRE11 PE=3 SV=2
Q0P5A1	Dynactin subunit 3 OS=Bos taurus OX=9913 GN=DCTN3 PE=2 SV=1
Q0VCY3	Surfeit locus protein 6 OS=Bos taurus OX=9913 GN=SURF6 PE=2 SV=1
P35526	Chloride intracellular channel protein 5 OS=Bos taurus OX=9913 GN=CLIC5 PE=2 SV=1
E1BGD1	Translocase of outer mitochondrial membrane 34 OS=Bos taurus OX=9913 GN=TOMM34 PE=4 SV=2
A0A3Q1M7E0	24-dehydrocholesterol reductase OS=Bos taurus OX=9913 GN=DHCR24 PE=4 SV=1
Q32P79	DNA-directed RNA polymerase II subunit RPB11 OS=Bos taurus OX=9913 GN=POLR2J PE=1 SV=1
Q0VC97	Carbonyl reductase 3 OS=Bos taurus OX=9913 GN=CBR3 PE=2 SV=1
Q0VCP0	Solute carrier family 33 (Acetyl-CoA transporter), member 1 OS=Bos taurus OX=9913 GN=SLC33A1 PE=2 SV=1
Q58CR3	Eukaryotic translation initiation factor 2D OS=Bos taurus OX=9913 GN=EIF2D PE=2 SV=1
Q3SX38	Myeloid leukemia factor 2 OS=Bos taurus OX=9913 GN=MLF2 PE=2 SV=1
A0JN39	Coatomer subunit beta OS=Bos taurus OX=9913 GN=COPB1 PE=1 SV=1
Q08E34	Translocase of outer mitochondrial membrane 70 OS=Bos taurus OX=9913 GN=TOMM70 PE=2 SV=1
A0A452DJ42	ATP synthase-coupling factor 6, mitochondrial OS=Bos taurus OX=9913 GN=ATP5PF PE=1 SV=1
A0A3Q1LR67	Uncharacterized protein OS=Bos taurus OX=9913 GN=RPL22 PE=1 SV=1
Q0P570	Diphosphomevalonate decarboxylase OS=Bos taurus OX=9913 GN=MVD PE=2 SV=1
A0A3Q1LLW4	Regulator of microtubule dynamics protein 1 OS=Bos taurus OX=9913 GN=RMDN1 PE=4 SV=1
A0A452DJK1	Peptidyl-prolyl cis-trans isomerase OS=Bos taurus OX=9913 GN=PPIF PE=3 SV=1
A0A452DI02	Acyl-protein thioesterase 1 OS=Bos taurus OX=9913 GN=LYPLA1 PE=4 SV=1
Q0P5M8	Mitochondrial-processing peptidase subunit alpha OS=Bos taurus OX=9913 GN=PMPCA PE=2 SV=1
Q5BIN5	Peptidyl-prolyl cis-trans isomerase NIMA-interacting 1 OS=Bos taurus OX=9913 GN=PIN1 PE=2 SV=1
E1BPB3	Eukaryotic translation initiation factor 2B subunit epsilon OS=Bos taurus OX=9913 GN=EIF2B5 PE=4 SV=2
Q0VCI9	Nucleolar protein 10 OS=Bos taurus OX=9913 GN=NOL10 PE=2 SV=1
E1BIE5	Ubiquitin conjugating enzyme E2 Q1 OS=Bos taurus OX=9913 GN=UBE2Q1 PE=4 SV=1
E1BGG6	Regulatory factor X5 OS=Bos taurus OX=9913 GN=RFX5 PE=4 SV=1
F1N6W2	Peptidyl-prolyl cis-trans isomerase OS=Bos taurus OX=9913 GN=PPIL4 PE=3 SV=1
Q2KHX3	PRA1 family protein 2 OS=Bos taurus OX=9913 GN=PRAF2 PE=2 SV=1
Q866N1	Epidermal growth factor (Fragment) OS=Bos taurus OX=9913 PE=4 SV=2
F1MFD1	Paxillin OS=Bos taurus OX=9913 GN=PXN PE=1 SV=3
M5FKI2	CTF18, chromosome transmission fidelity factor 18 homolog OS=Bos taurus OX=9913 GN=CHTF18 PE=4 SV=1
Q3ZBF3	39S ribosomal protein L38, mitochondrial OS=Bos taurus OX=9913 GN=MRPL38 PE=1 SV=2
A7Z048	PRUNE2 protein OS=Bos taurus OX=9913 GN=PRUNE2 PE=2 SV=1
F1MZC3	Ribonuclease P protein subunit p40 OS=Bos taurus OX=9913 GN=RPP40 PE=4 SV=2
A2VEA3	E3 ubiquitin-protein ligase ARIH1 OS=Bos taurus OX=9913 GN=ARIH1 PE=2 SV=1
Q3T169	40S ribosomal protein S3 OS=Bos taurus OX=9913 GN=RPS3 PE=2 SV=1
P08169	Cation-independent mannose-6-phosphate receptor OS=Bos taurus OX=9913 GN=IGF2R PE=1 SV=2
E1BHM5	RNA binding motif protein 25 OS=Bos taurus OX=9913 GN=RBM25 PE=4 SV=2
A0A3Q1LMU9	Eukaryotic translation initiation factor 3 subunit H OS=Bos taurus OX=9913 GN=EIF3H PE=3 SV=1
Q3MHE4	DNA mismatch repair protein Msh2 OS=Bos taurus OX=9913 GN=MSH2 PE=2 SV=1
Q1RMH9	DnaJ homolog subfamily C member 2 OS=Bos taurus OX=9913 GN=DNAJC2 PE=2 SV=1
E1BGS4	Taxilin alpha OS=Bos taurus OX=9913 GN=TXLNA PE=4 SV=1
Q2YDJ0	Nucleolar and spindle-associated protein 1 OS=Bos taurus OX=9913 GN=NUSAP1 PE=2 SV=1
F2Z4H8	TIA1 cytotoxic granule associated RNA binding protein like 1 OS=Bos taurus OX=9913 GN=TIAL1 PE=4 SV=3
E1BEX4	Uroporphyrinogen decarboxylase OS=Bos taurus OX=9913 GN=UROD PE=3 SV=1
A0A3Q1LKI5	Ubiquitin protein ligase E3 component n-recognin 5 OS=Bos taurus OX=9913 GN=UBR5 PE=4 SV=1
A0A3Q1MVD3	Lunapark, ER junction formation factor OS=Bos taurus OX=9913 GN=LNPK PE=4 SV=1
F1MSF6	UTP3, small subunit processome component OS=Bos taurus OX=9913 GN=UTP3 PE=4 SV=2
Q3SZE9	Tubulin-specific chaperone C OS=Bos taurus OX=9913 GN=TBCC PE=2 SV=1
E1BC14	60S ribosome subunit biogenesis protein NIP7 homolog OS=Bos taurus OX=9913 GN=NIP7 PE=3 SV=1
Q10568	Cleavage and polyadenylation specificity factor subunit 2 OS=Bos taurus OX=9913 GN=CPSF2 PE=1 SV=1
Q2T9V1	Peptidylprolyl isomerase (Cyclophilin)-like 2 OS=Bos taurus OX=9913 GN=PPIL2 PE=2 SV=1
A0A3Q1MVV7	Bromodomain PHD finger transcription factor OS=Bos taurus OX=9913 GN=BPTF PE=4 SV=1
Q5EA82	Chromosome 6 open reading frame 11 OS=Bos taurus OX=9913 GN=WDR46 PE=2 SV=1
E1BQ32	CRK proto-oncogene, adaptor protein OS=Bos taurus OX=9913 GN=CRK PE=4 SV=1
Q71SS4	Derlin-1 OS=Bos taurus OX=9913 GN=DERL1 PE=2 SV=1
A0A3Q1LPK0	GPALPP motifs-containing protein 1 OS=Bos taurus OX=9913 GN=GPALPP1 PE=4 SV=1
Q08DX5	Cyclin-dependent kinase 7 OS=Bos taurus OX=9913 GN=CDK7 PE=2 SV=1
F1MP98	Histone acetyltransferase OS=Bos taurus OX=9913 GN=KAT8 PE=3 SV=1
Q76I82	40S ribosomal protein S15a OS=Bos taurus OX=9913 GN=RPS15A PE=2 SV=1
F1MFD5	Ran GTPase activating protein 1 OS=Bos taurus OX=9913 GN=RANGAP1 PE=4 SV=1
Q58DA7	Glutaredoxin-3 OS=Bos taurus OX=9913 GN=GLRX3 PE=2 SV=1
P31408	V-type proton ATPase subunit B, brain isoform OS=Bos taurus OX=9913 GN=ATP6V1B2 PE=1 SV=3
Q58D10	DnaJ subfamily A member 2 OS=Bos taurus OX=9913 GN=DNAJA2 PE=2 SV=1
Q3ZBL0	Small nuclear ribonucleoprotein G OS=Bos taurus OX=9913 GN=SNRPG PE=3 SV=1
A0A3Q1LWK0	ADP-ribosylation factor GTPase-activating protein 2 OS=Bos taurus OX=9913 GN=ARFGAP2 PE=4 SV=1
Q0VD53	Vacuolar protein sorting-associated protein 26A OS=Bos taurus OX=9913 GN=VPS26A PE=2 SV=1
A0A2H4GTF0	Interferon regulatory factor 3 OS=Bos taurus OX=9913 PE=2 SV=1
F1MRX4	Ribosome biogenesis protein BOP1 OS=Bos taurus OX=9913 GN=BOP1 PE=3 SV=3
E1BCT9	Uncharacterized protein OS=Bos taurus OX=9913 GN=RBM27 PE=4 SV=2
F1N672	Transmembrane 9 superfamily member OS=Bos taurus OX=9913 GN=TM9SF2 PE=1 SV=3
A5PK45	Procollagen galactosyltransferase 1 OS=Bos taurus OX=9913 GN=COLGALT1 PE=2 SV=1
E1BMZ8	5'-3' exoribonuclease 1 OS=Bos taurus OX=9913 GN=XRN1 PE=3 SV=2
F1MRE5	Acyl-CoA binding domain containing 3 OS=Bos taurus OX=9913 GN=ACBD3 PE=1 SV=1
Q3SZ41	Recombining binding protein suppressor of hairless OS=Bos taurus OX=9913 GN=RBPJ PE=2 SV=1
E1BDV7	N(alpha)-acetyltransferase 25, NatB auxiliary subunit OS=Bos taurus OX=9913 GN=NAA25 PE=4 SV=3
Q3SX36	TFG protein OS=Bos taurus OX=9913 GN=TFG PE=1 SV=1
A0A3Q1LTV4	RAB3 GTPase activating non-catalytic protein subunit 2 OS=Bos taurus OX=9913 GN=RAB3GAP2 PE=4 SV=1
A0A3Q1NJE9	Cell cycle control protein OS=Bos taurus OX=9913 GN=TMEM30A PE=3 SV=1
Q0VD01	U3 small nucleolar ribonucleoprotein protein IMP4 OS=Bos taurus OX=9913 GN=IMP4 PE=2 SV=1
Q3ZBP3	RNA-binding motif, single-stranded-interacting protein 1 OS=Bos taurus OX=9913 GN=RBMS1 PE=2 SV=1
Q2TBN7	Mediator of RNA polymerase II transcription subunit 27 OS=Bos taurus OX=9913 GN=MED27 PE=2 SV=1
A0A3Q1LRW8	60S ribosomal protein L3 OS=Bos taurus OX=9913 GN=RPL3 PE=1 SV=1
A0A452DIA7	40S ribosomal protein S2 OS=Bos taurus OX=9913 GN=RPS2 PE=3 SV=1
A0A3Q1M3Y2	Chromodomain helicase DNA binding protein 3 OS=Bos taurus OX=9913 GN=CHD3 PE=4 SV=1
F1MPG7	RNA cytidine acetyltransferase OS=Bos taurus OX=9913 GN=NAT10 PE=3 SV=3
F1MNS8	PDGFA associated protein 1 OS=Bos taurus OX=9913 GN=PDAP1 PE=4 SV=3
P33097	Aspartate aminotransferase, cytoplasmic OS=Bos taurus OX=9913 GN=GOT1 PE=1 SV=3
A0A3Q1MVS3	Serine/threonine-protein phosphatase 2A 55 kDa regulatory subunit B OS=Bos taurus OX=9913 GN=PPP2R2A PE=3 SV=1
F1ML90	Poly [ADP-ribose] polymerase OS=Bos taurus OX=9913 GN=PARP14 PE=4 SV=3
E1BJF6	Symplekin OS=Bos taurus OX=9913 GN=SYMPK PE=4 SV=2
E1BGC3	WAPL cohesin release factor OS=Bos taurus OX=9913 GN=WAPL PE=4 SV=1
E1BKW5	SEC23 interacting protein OS=Bos taurus OX=9913 GN=SEC23IP PE=4 SV=3
Q2HJH9	Programmed cell death protein 5 OS=Bos taurus OX=9913 GN=PDCD5 PE=2 SV=3
Q7YRC1	AH receptor-interacting protein OS=Bos taurus OX=9913 GN=AIP PE=2 SV=1
A0A3Q1MI26	Acyl-coenzyme A oxidase OS=Bos taurus OX=9913 GN=ACOX1 PE=1 SV=1
Q3T0T5	Jupiter microtubule associated homolog 1 OS=Bos taurus OX=9913 GN=JPT1 PE=2 SV=3
A5PKG2	PAIP1 protein OS=Bos taurus OX=9913 GN=PAIP1 PE=2 SV=1
A0A3Q1MIF3	Importin 8 OS=Bos taurus OX=9913 GN=IPO8 PE=4 SV=1
E1BD64	Mitochondrial pyruvate carrier OS=Bos taurus OX=9913 GN=MPC2 PE=3 SV=2
Q148C8	Migration and invasion enhancer 1 OS=Bos taurus OX=9913 GN=MIEN1 PE=3 SV=1
A0A3Q1LXU0	Tubulin-specific chaperone E OS=Bos taurus OX=9913 GN=TBCE PE=4 SV=1
F1MWS9	Brix domain-containing protein OS=Bos taurus OX=9913 GN=PPAN PE=4 SV=1
Q17QI2	RNA polymerase II subunit A C-terminal domain phosphatase SSU72 OS=Bos taurus OX=9913 GN=SSU72 PE=2 SV=1
Q3SX11	Ribosome biogenesis protein NSA2 homolog OS=Bos taurus OX=9913 GN=NSA2 PE=2 SV=1
A6QLZ3	ARSB protein OS=Bos taurus OX=9913 GN=ARSB PE=2 SV=1
Q5E995	40S ribosomal protein S6 OS=Bos taurus OX=9913 GN=RPS6 PE=2 SV=1
P61257	60S ribosomal protein L26 OS=Bos taurus OX=9913 GN=RPL26 PE=2 SV=1
F2Z4F0	Actin related protein 1A OS=Bos taurus OX=9913 GN=ACTR1A PE=1 SV=1
A5D7S0	NAPA protein OS=Bos taurus OX=9913 GN=NAPA PE=2 SV=1
Q3T0L7	60S ribosomal protein L28 OS=Bos taurus OX=9913 GN=RPL28 PE=2 SV=3
A0A3Q1NKI3	Importin subunit alpha OS=Bos taurus OX=9913 GN=KPNA3 PE=3 SV=1
Q5EA80	Geranylgeranyl transferase type-2 subunit alpha OS=Bos taurus OX=9913 GN=RABGGTA PE=2 SV=1
Q17QJ7	Pyrroline-5-carboxylate reductase 2 OS=Bos taurus OX=9913 GN=PYCR2 PE=2 SV=1
Q0P5D0	Peptidyl-prolyl cis-trans isomerase H OS=Bos taurus OX=9913 GN=PPIH PE=2 SV=1
F1N7U2	NPL4 homolog, ubiquitin recognition factor OS=Bos taurus OX=9913 GN=NPLOC4 PE=4 SV=2
A0A3Q1MRT9	Leucine rich repeat containing 40 OS=Bos taurus OX=9913 GN=LRRC40 PE=4 SV=1
A0A3Q1LXY6	Rho-associated protein kinase 2 OS=Bos taurus OX=9913 GN=ROCK2 PE=3 SV=1
E1BCS1	CCR4-NOT transcription complex subunit 3 OS=Bos taurus OX=9913 GN=CNOT3 PE=4 SV=3
Q05KI6	BH3-interacting domain death agonist OS=Bos taurus OX=9913 GN=BID1 PE=2 SV=1
E1BFW2	Interacts with SUPT6H, CTD assembly factor 1 OS=Bos taurus OX=9913 GN=IWS1 PE=4 SV=3
Q3SZ22	39S ribosomal protein L46, mitochondrial OS=Bos taurus OX=9913 GN=MRPL46 PE=2 SV=1
A0A3Q1MDP7	WD repeat domain 75 OS=Bos taurus OX=9913 GN=WDR75 PE=4 SV=1
F1MBI1	Proteasome subunit beta OS=Bos taurus OX=9913 GN=PSMB7 PE=3 SV=2
Q2KJ61	Elongator complex protein 3 OS=Bos taurus OX=9913 GN=ELP3 PE=2 SV=2
Q32L52	Glucose-induced degradation protein 8 homolog OS=Bos taurus OX=9913 GN=GID8 PE=2 SV=1
E1BIU7	Protein tyrosine phosphatase non-receptor type 23 OS=Bos taurus OX=9913 GN=PTPN23 PE=4 SV=3
A0A3Q1NDU7	Protein kinase domain-containing protein OS=Bos taurus OX=9913 GN=GSK3B PE=3 SV=1
P82923	28S ribosomal protein S2, mitochondrial OS=Bos taurus OX=9913 GN=MRPS2 PE=1 SV=2
F1MVZ6	P2X purinoceptor OS=Bos taurus OX=9913 GN=P2RX7 PE=3 SV=3
A7YWB9	MGC139004 protein OS=Bos taurus OX=9913 GN=MGC139004 PE=2 SV=1
Q2NKS9	UPF0184 protein C9orf16 homolog OS=Bos taurus OX=9913 PE=3 SV=1
E1B8K6	Uncharacterized protein OS=Bos taurus OX=9913 GN=NCL PE=1 SV=1
F1MYG5	Lamin A/C OS=Bos taurus OX=9913 GN=LMNA PE=1 SV=1
E1BNP8	SPT16 homolog, facilitates chromatin remodeling subunit OS=Bos taurus OX=9913 GN=SUPT16H PE=4 SV=2
Q2KJ46	26S proteasome non-ATPase regulatory subunit 3 OS=Bos taurus OX=9913 GN=PSMD3 PE=2 SV=1
A0A3Q1LSJ7	Dynactin subunit 2 OS=Bos taurus OX=9913 GN=DCTN2 PE=1 SV=1
P81425	Dipeptidyl peptidase 4 OS=Bos taurus OX=9913 GN=DPP4 PE=1 SV=3
E1B8M0	Centrosomal protein 55 OS=Bos taurus OX=9913 GN=CEP55 PE=4 SV=1
A0A3Q1M927	Small ubiquitin-related modifier OS=Bos taurus OX=9913 PE=3 SV=1
F2Z4C4	U4/U6 small nuclear ribonucleoprotein Prp3 OS=Bos taurus OX=9913 GN=PRPF3 PE=4 SV=1
F1N7H7	Cytoplasmic dynein 1 intermediate chain 2 OS=Bos taurus OX=9913 GN=DYNC1I2 PE=4 SV=3
A0A3Q1NCN2	Ribosomal RNA processing 9, U3 small nucleolar RNA binding protein OS=Bos taurus OX=9913 GN=RRP9 PE=4 SV=1
Q32L46	5'-nucleotidase OS=Bos taurus OX=9913 GN=NT5C3A PE=2 SV=1
A6QQP1	DAP3 protein (Fragment) OS=Bos taurus OX=9913 GN=DAP3 PE=1 SV=1
A6H704	CHMP7 protein OS=Bos taurus OX=9913 GN=CHMP7 PE=2 SV=1
Q5EA32	Transient receptor potential cation channel subfamily V member 2 OS=Bos taurus OX=9913 GN=TRPV2 PE=2 SV=1
Q08DK4	Mitochondrial glutamate carrier 1 OS=Bos taurus OX=9913 GN=SLC25A22 PE=2 SV=1
Q32KU8	NudC domain containing 2 OS=Bos taurus OX=9913 GN=NUDCD2 PE=2 SV=1
A5D7C2	Protein SDA1 homolog OS=Bos taurus OX=9913 GN=SDAD1 PE=2 SV=1
F1MMA6	Integrator complex subunit 9 OS=Bos taurus OX=9913 GN=INTS9 PE=4 SV=1
A0A3Q1M1I6	Galactose-1-phosphate uridylyltransferase OS=Bos taurus OX=9913 GN=GALT PE=4 SV=1
Q2HJH3	Ester hydrolase C11orf54 homolog OS=Bos taurus OX=9913 PE=2 SV=1
A0A3Q1LHT7	Ribosome binding protein 1 OS=Bos taurus OX=9913 GN=RRBP1 PE=1 SV=1
E9RHW1	Heat shock 27kDa protein 1 OS=Bos taurus OX=9913 GN=HSPB1 PE=2 SV=1
A1A4K3	DNA damage-binding protein 1 OS=Bos taurus OX=9913 GN=DDB1 PE=1 SV=1
Q6VUQ8	Beta-2-microglobulin (Fragment) OS=Bos taurus OX=9913 GN=B2M PE=3 SV=1
Q3T0D7	GTP-binding protein SAR1a OS=Bos taurus OX=9913 GN=SAR1A PE=2 SV=1
F1N532	EMG1 N1-specific pseudouridine methyltransferase OS=Bos taurus OX=9913 GN=EMG1 PE=4 SV=2
G3MXJ5	Lysosomal associated membrane protein 2 OS=Bos taurus OX=9913 GN=LAMP2 PE=1 SV=2
F1N1R4	DIS3 homolog, exosome endoribonuclease and 3'-5' exoribonuclease OS=Bos taurus OX=9913 GN=DIS3 PE=3 SV=3
A3KN18	CEBPZ protein OS=Bos taurus OX=9913 GN=CEBPZ PE=2 SV=1
A2VE20	UBE2G1 protein OS=Bos taurus OX=9913 GN=UBE2G1 PE=2 SV=1
A0A3Q1MKT3	G protein signaling modulator 1 OS=Bos taurus OX=9913 GN=GPSM1 PE=4 SV=1
Q0IIF2	Translation initiation factor eIF-2B subunit alpha OS=Bos taurus OX=9913 GN=EIF2B1 PE=2 SV=1
Q32L86	Transmembrane protein 126A OS=Bos taurus OX=9913 GN=TMEM126A PE=2 SV=1
Q2KJ77	HSPA (Heat shock 70kDa) binding protein, cytoplasmic cochaperone 1 OS=Bos taurus OX=9913 GN=HSPBP1 PE=2 SV=1
Q2KID7	Oligosaccharyltransferase complex subunit OSTC OS=Bos taurus OX=9913 GN=OSTC PE=2 SV=1
E1BGP1	Leucine rich repeats and calponin homology domain containing 3 OS=Bos taurus OX=9913 GN=LRCH3 PE=4 SV=3
F1MCU6	Queuine tRNA-ribosyltransferase catalytic subunit 1 OS=Bos taurus OX=9913 GN=QTRT1 PE=3 SV=3
Q3MHY7	39S ribosomal protein L10, mitochondrial OS=Bos taurus OX=9913 GN=MRPL10 PE=1 SV=2
A0A3Q1ME40	NEDD4 binding protein 1 OS=Bos taurus OX=9913 GN=N4BP1 PE=4 SV=1
E1BDK3	N(alpha)-acetyltransferase 30, NatC catalytic subunit OS=Bos taurus OX=9913 GN=NAA30 PE=4 SV=1
F1MZT7	GCN1 activator of EIF2AK4 OS=Bos taurus OX=9913 GN=GCN1 PE=4 SV=2
A0A452DJ82	Rho GDP-dissociation inhibitor 1 OS=Bos taurus OX=9913 GN=ARHGDIA PE=4 SV=1
E1BJA2	Apoptosis inducing factor mitochondria associated 1 OS=Bos taurus OX=9913 GN=AIFM1 PE=1 SV=1
A1L528	RAB1A, member RAS oncogene family OS=Bos taurus OX=9913 GN=RAB1A PE=1 SV=1
A5PJZ5	Nuclear pore complex protein Nup93 OS=Bos taurus OX=9913 GN=NUP93 PE=2 SV=1
Q3SYR7	60S ribosomal protein L9 OS=Bos taurus OX=9913 GN=RPL9 PE=2 SV=1
U3Q4C5	Erythrocyte membrane protein band 4.1 like 2 OS=Bos taurus OX=9913 GN=EPB41L2 PE=2 SV=1
A0A3Q1MEC9	Transportin 2 OS=Bos taurus OX=9913 GN=TNPO2 PE=4 SV=1
A0A3Q1N8F8	60S ribosomal protein L11 OS=Bos taurus OX=9913 GN=RPL11 PE=3 SV=1
A0A3Q1MF35	Pre-mRNA processing factor 40 homolog A OS=Bos taurus OX=9913 GN=PRPF40A PE=4 SV=1
A0A3Q1LQQ3	5'-3' exoribonuclease OS=Bos taurus OX=9913 GN=XRN2 PE=3 SV=1
O62703	Beta-catenin-like protein 1 OS=Bos taurus OX=9913 GN=CTNNBL1 PE=2 SV=3
F1MH76	Uncharacterized protein OS=Bos taurus OX=9913 PE=3 SV=2
Q58D56	Developmentally-regulated GTP-binding protein 2 OS=Bos taurus OX=9913 GN=DRG2 PE=2 SV=1
Q0IIM6	Ubiquitin specific peptidase 8 OS=Bos taurus OX=9913 GN=USP8 PE=2 SV=1
Q3ZBL1	1,2-dihydroxy-3-keto-5-methylthiopentene dioxygenase OS=Bos taurus OX=9913 GN=ADI1 PE=2 SV=2
A0A3S5ZPI7	Cytochrome b5 type B OS=Bos taurus OX=9913 GN=CYB5B PE=3 SV=1
F1MUA8	UBX domain-containing protein 7 OS=Bos taurus OX=9913 GN=UBXN7 PE=4 SV=3
P60519	Gamma-aminobutyric acid receptor-associated protein-like 2 OS=Bos taurus OX=9913 GN=GABARAPL2 PE=1 SV=1
Q2KID6	Pleiotropic regulator 1 OS=Bos taurus OX=9913 GN=PLRG1 PE=2 SV=1
P82931	28S ribosomal protein S6, mitochondrial OS=Bos taurus OX=9913 GN=MRPS6 PE=1 SV=4
Q3MHH2	Nucleolar protein 11 OS=Bos taurus OX=9913 GN=NOL11 PE=2 SV=1
F1MPP1	RAB21, member RAS oncogene family OS=Bos taurus OX=9913 GN=RAB21 PE=4 SV=2
Q08DF7	2',5'-phosphodiesterase 12 OS=Bos taurus OX=9913 GN=PDE12 PE=1 SV=1
Q0VCP1	Adenylate kinase 4, mitochondrial OS=Bos taurus OX=9913 GN=AK4 PE=2 SV=1
Q3T0M3	U3 small nucleolar ribonucleoprotein protein IMP3 OS=Bos taurus OX=9913 GN=IMP3 PE=2 SV=1
A0A3Q1M6T0	Protein phosphatase 4 regulatory subunit 2 OS=Bos taurus OX=9913 GN=PPP4R2 PE=4 SV=1
E1BAG2	Exosome component 5 OS=Bos taurus OX=9913 GN=EXOSC5 PE=4 SV=1
Q5E9C3	Sjoegren syndrome nuclear autoantigen 1 homolog OS=Bos taurus OX=9913 GN=SSNA1 PE=3 SV=1
F1MV07	SEC24 homolog D, COPII coat complex component OS=Bos taurus OX=9913 GN=SEC24D PE=4 SV=2
Q3ZC02	DCTN5 protein OS=Bos taurus OX=9913 GN=DCTN5 PE=2 SV=1
E1BN74	SGF29 C-terminal domain-containing protein OS=Bos taurus OX=9913 GN=SGF29 PE=4 SV=3
A7MBB2	CYTIP protein OS=Bos taurus OX=9913 GN=CYTIP PE=2 SV=1
E1B9D9	TNF receptor-associated factor OS=Bos taurus OX=9913 GN=TRAF2 PE=3 SV=3
P00727	Cytosol aminopeptidase OS=Bos taurus OX=9913 GN=LAP3 PE=1 SV=3
A0A3Q1MS21	Voltage-dependent anion-selective channel protein 1 OS=Bos taurus OX=9913 GN=VDAC1 PE=1 SV=1
Q3SZC6	Acidic leucine-rich nuclear phosphoprotein 32 family member B OS=Bos taurus OX=9913 GN=ANP32B PE=2 SV=1
F1MI03	Serine/arginine repetitive matrix 2 OS=Bos taurus OX=9913 GN=SRRM2 PE=4 SV=2
F1ML72	Ribosomal protein L34 OS=Bos taurus OX=9913 GN=RPL34 PE=4 SV=2
E1BG76	Sec1 family domain containing 1 OS=Bos taurus OX=9913 GN=SCFD1 PE=3 SV=3
F1MB18	NK2B OS=Bos taurus OX=9913 GN=LOC104968634 PE=1 SV=3
A0A3Q1LIQ9	Tubulin-specific chaperone D OS=Bos taurus OX=9913 GN=TBCD PE=4 SV=1
E1BAL7	GB1/RHD3-type G domain-containing protein OS=Bos taurus OX=9913 GN=LOC783604 PE=4 SV=3
F1MT65	PWWP domain-containing protein OS=Bos taurus OX=9913 GN=HDGFL2 PE=4 SV=3
Q2T9W2	THUMP domain-containing protein 3 OS=Bos taurus OX=9913 GN=THUMPD3 PE=2 SV=1
Q2HJD3	Opioid growth factor receptor OS=Bos taurus OX=9913 GN=OGFR PE=2 SV=1
P61085	Ubiquitin-conjugating enzyme E2 K OS=Bos taurus OX=9913 GN=UBE2K PE=1 SV=3
F1MX77	Vir like m6A methyltransferase associated OS=Bos taurus OX=9913 GN=VIRMA PE=4 SV=3
F1MI29	Exportin 6 OS=Bos taurus OX=9913 GN=XPO6 PE=4 SV=2
A4IFR1	CD2 cytoplasmic tail binding protein 2 OS=Bos taurus OX=9913 GN=CD2BP2 PE=2 SV=1
Q0VD27	Enolase-phosphatase E1 OS=Bos taurus OX=9913 GN=ENOPH1 PE=2 SV=1
F1N120	Latexin OS=Bos taurus OX=9913 GN=LXN PE=4 SV=2
Q2HJ56	Periodic tryptophan protein 1 homolog OS=Bos taurus OX=9913 GN=PWP1 PE=2 SV=1
A5PJI3	Nucleoporin NUP53 OS=Bos taurus OX=9913 GN=NUP35 PE=1 SV=1
G3MYK8	Activating signal cointegrator 1 complex subunit 3 OS=Bos taurus OX=9913 GN=ASCC3 PE=4 SV=2
F1MJJ7	MAPK regulated corepressor interacting protein 1 OS=Bos taurus OX=9913 GN=MCRIP1 PE=4 SV=1
E1BGA6	Component of oligomeric golgi complex 3 OS=Bos taurus OX=9913 GN=COG3 PE=4 SV=3
E1BCT7	WD repeat domain 33 OS=Bos taurus OX=9913 GN=WDR33 PE=4 SV=1
Q2KIT5	Protein disulfide isomerase CRELD2 OS=Bos taurus OX=9913 GN=CRELD2 PE=2 SV=1
F1MQ89	Component of oligomeric golgi complex 2 OS=Bos taurus OX=9913 GN=COG2 PE=4 SV=1
Q1JQ91	Polymerase (RNA) II (DNA directed) polypeptide D OS=Bos taurus OX=9913 GN=POLR2D PE=1 SV=1
F1MEN2	Sperm antigen with calponin homology and coiled-coil domains 1 OS=Bos taurus OX=9913 GN=SPECC1 PE=4 SV=3
Q3SYZ0	BCL2-associated agonist of cell death OS=Bos taurus OX=9913 GN=BAD PE=2 SV=1
A0A3Q1LM04	VPS8 subunit of CORVET complex OS=Bos taurus OX=9913 GN=VPS8 PE=4 SV=1
Q5E946	Protein/nucleic acid deglycase DJ-1 OS=Bos taurus OX=9913 GN=PARK7 PE=2 SV=1
Q5EAD2	D-3-phosphoglycerate dehydrogenase OS=Bos taurus OX=9913 GN=PHGDH PE=2 SV=3
B3IVN4	M1-type pyruvate kinase (Fragment) OS=Bos taurus OX=9913 GN=PKM PE=2 SV=1
Q2LGB8	Caspase 8 OS=Bos taurus OX=9913 GN=CASP8 PE=2 SV=1
A0A3Q1NEM4	Adenosine deaminase RNA specific OS=Bos taurus OX=9913 GN=ADAR PE=4 SV=1
Q5E963	Actin-related protein 2/3 complex subunit 5-like protein OS=Bos taurus OX=9913 GN=ARPC5L PE=2 SV=1
A0A452DIC8	RNA-binding protein 8A OS=Bos taurus OX=9913 GN=RBM8A PE=3 SV=1
A0A3Q1LXX9	Coatomer subunit epsilon OS=Bos taurus OX=9913 GN=COPE PE=1 SV=1
A6H7B5	COP9 signalosome complex subunit 3 OS=Bos taurus OX=9913 GN=COPS3 PE=2 SV=1
A7Z038	ABCD3 protein OS=Bos taurus OX=9913 GN=ABCD3 PE=2 SV=1
F1MTK7	Protein FAM107B OS=Bos taurus OX=9913 GN=FAM107B PE=4 SV=2
A0A3Q1MNU7	RNA binding motif protein 26 OS=Bos taurus OX=9913 GN=RBM26 PE=4 SV=1
E1BD42	Nucleoporin 37 OS=Bos taurus OX=9913 GN=NUP37 PE=4 SV=1
A0A3Q1LQ64	UTP6 small subunit processome component OS=Bos taurus OX=9913 GN=UTP6 PE=4 SV=1
A4FV40	Translation initiation factor eIF-2B subunit gamma OS=Bos taurus OX=9913 GN=EIF2B3 PE=2 SV=1
M5FK10	28S ribosomal protein S34, mitochondrial OS=Bos taurus OX=9913 GN=MRPS34 PE=4 SV=1
Q2HJ18	Vacuolar protein sorting-associated protein 33B OS=Bos taurus OX=9913 GN=VPS33B PE=2 SV=1
Q0VC17	Phosphomannomutase OS=Bos taurus OX=9913 GN=PMM1 PE=2 SV=1
A0A3Q1LIG1	Metaxin 2 OS=Bos taurus OX=9913 GN=MTX2 PE=4 SV=1
A0A3Q1M346	Methionine synthase OS=Bos taurus OX=9913 GN=MTR PE=4 SV=1
Q58DQ3	60S ribosomal protein L6 OS=Bos taurus OX=9913 GN=RPL6 PE=2 SV=3
F1MK30	60S ribosomal protein L13 OS=Bos taurus OX=9913 GN=RPL13 PE=3 SV=2
A6QLG5	40S ribosomal protein S9 OS=Bos taurus OX=9913 GN=RPS9 PE=2 SV=1
Q3SZ62	Phosphoglycerate mutase 1 OS=Bos taurus OX=9913 GN=PGAM1 PE=2 SV=3
Q58DU5	Proteasome subunit alpha type-3 OS=Bos taurus OX=9913 GN=PSMA3 PE=1 SV=3
Q3SZQ6	60S ribosomal protein L32 OS=Bos taurus OX=9913 GN=RPL32 PE=2 SV=3
F1MRS1	Protein phosphatase 4 regulatory subunit 1 OS=Bos taurus OX=9913 GN=PPP4R1 PE=1 SV=3
Q2KIA2	Multifunctional methyltransferase subunit TRM112-like protein OS=Bos taurus OX=9913 GN=TRMT112 PE=2 SV=1
Q3SZC2	Proteasome subunit beta type-9 OS=Bos taurus OX=9913 GN=PSMB9 PE=1 SV=1
Q2NL21	DnaJ homolog subfamily C member 11 OS=Bos taurus OX=9913 GN=DNAJC11 PE=2 SV=1
A0A3Q1M4Z2	Clathrin interactor 1 OS=Bos taurus OX=9913 GN=CLINT1 PE=4 SV=1
A6QQT9	Acetolactate synthase-like protein OS=Bos taurus OX=9913 GN=ILVBL PE=2 SV=2
Q08DR0	PHD finger protein 6 OS=Bos taurus OX=9913 GN=PHF6 PE=2 SV=1
A0A3Q1MY98	Elongator complex protein 1 OS=Bos taurus OX=9913 GN=ELP1 PE=3 SV=1
Q3ZBE2	Similar to COX17 homolog, cytochrome c oxidase assembly protein OS=Bos taurus OX=9913 GN=MGC128036 PE=2 SV=1
A0A3Q1LNC1	Lethal(2) giant larvae protein homolog 1 OS=Bos taurus OX=9913 GN=LLGL1 PE=4 SV=1
A0A3Q1M175	ER membrane protein complex subunit 1 OS=Bos taurus OX=9913 GN=EMC1 PE=4 SV=1
Q1LZE1	E3 ubiquitin-protein ligase KCMF1 OS=Bos taurus OX=9913 GN=KCMF1 PE=2 SV=1
A0A3Q1LZT9	WW domain binding protein 2 OS=Bos taurus OX=9913 GN=WBP2 PE=4 SV=1
Q08DT6	39S ribosomal protein L47, mitochondrial OS=Bos taurus OX=9913 GN=MRPL47 PE=2 SV=1
F1MZ95	Mediator complex subunit 12 OS=Bos taurus OX=9913 GN=MED12 PE=4 SV=3
Q32PG3	WD repeat-containing protein 48 OS=Bos taurus OX=9913 GN=WDR48 PE=2 SV=1
Q148G8	Ubiquinol-cytochrome-c reductase complex assembly factor 3 OS=Bos taurus OX=9913 GN=UQCC3 PE=3 SV=1
Q3SZV8	Reactive oxygen species modulator 1 OS=Bos taurus OX=9913 GN=ROMO1 PE=3 SV=1
A7Z066	Calnexin OS=Bos taurus OX=9913 GN=CANX PE=1 SV=1
E1BE98	Exportin 1 OS=Bos taurus OX=9913 GN=XPO1 PE=4 SV=2
A0A3Q1MIM4	Heterogeneous nuclear ribonucleoprotein H1 OS=Bos taurus OX=9913 GN=HNRNPH1 PE=1 SV=1
Q95115	Signal transducer and activator of transcription 5A OS=Bos taurus OX=9913 GN=STAT5A PE=2 SV=2
A0A3Q1M9B3	60S ribosomal protein L18 OS=Bos taurus OX=9913 GN=RPL18 PE=1 SV=1
P61356	60S ribosomal protein L27 OS=Bos taurus OX=9913 GN=RPL27 PE=2 SV=2
P01888	Beta-2-microglobulin OS=Bos taurus OX=9913 GN=B2M PE=1 SV=2
A5D982	Tyrosine-protein phosphatase non-receptor type OS=Bos taurus OX=9913 GN=PTPN2 PE=2 SV=1
A4FUZ1	Lactoylglutathione lyase OS=Bos taurus OX=9913 GN=GLO1 PE=2 SV=1
A1XG22	NF-kappaB transcription factor p65 subunit OS=Bos taurus OX=9913 GN=RELA PE=2 SV=1
A0A3Q1N3E6	GRIP1 associated protein 1 OS=Bos taurus OX=9913 GN=GRIPAP1 PE=4 SV=1
P00125	Cytochrome c1, heme protein, mitochondrial OS=Bos taurus OX=9913 GN=CYC1 PE=1 SV=2
Q2TBL9	Trafficking protein particle complex subunit 4 OS=Bos taurus OX=9913 GN=TRAPPC4 PE=2 SV=1
F1N2G9	Transcription activation suppressor OS=Bos taurus OX=9913 GN=TASOR PE=4 SV=3
F1MJY2	Rap guanine nucleotide exchange factor 1 OS=Bos taurus OX=9913 GN=RAPGEF1 PE=4 SV=3
Q3T051	60S ribosomal protein L39 OS=Bos taurus OX=9913 GN=RPL39 PE=3 SV=3
Q3ZBW7	Mitochondrial fission regulator 1-like OS=Bos taurus OX=9913 GN=MTFR1L PE=2 SV=1
Q3SZ34	Ubiquitin-like 4A OS=Bos taurus OX=9913 GN=UBL4A PE=2 SV=1
A0A3Q1NI65	Ubiquitin carboxyl-terminal hydrolase 16 OS=Bos taurus OX=9913 GN=USP16 PE=3 SV=1
A4IFA4	Acyl-coenzyme A oxidase OS=Bos taurus OX=9913 GN=ACOX3 PE=2 SV=1
Q3T0P6	Phosphoglycerate kinase 1 OS=Bos taurus OX=9913 GN=PGK1 PE=2 SV=3
Q3ZC44	Heterogeneous nuclear ribonucleoprotein A/B OS=Bos taurus OX=9913 GN=HNRNPAB PE=1 SV=1
A2VDN6	Splicing factor 3A subunit 1 OS=Bos taurus OX=9913 GN=SF3A1 PE=2 SV=1
G3X6W2	RAD50 double strand break repair protein OS=Bos taurus OX=9913 GN=RAD50 PE=4 SV=1
G5E5C4	Protein RRP5 homolog OS=Bos taurus OX=9913 GN=PDCD11 PE=4 SV=2
Q2TBT5	Ribonuclease H2 subunit A OS=Bos taurus OX=9913 GN=RNASEH2A PE=1 SV=1
A7E3W2	Galectin-3-binding protein OS=Bos taurus OX=9913 GN=LGALS3BP PE=1 SV=1
G5E5Y0	Small nuclear ribonucleoprotein polypeptide B2 OS=Bos taurus OX=9913 GN=SNRPB2 PE=4 SV=1
A7MB77	RBM17 protein OS=Bos taurus OX=9913 GN=RBM17 PE=2 SV=1
Q0X0C4	Protein HEXIM1 OS=Bos taurus OX=9913 GN=HEXIM1 PE=2 SV=1
F2Z4J4	DNA-directed RNA polymerases I, II, and III subunit RPABC1 OS=Bos taurus OX=9913 GN=POLR2E PE=3 SV=1
A0A3Q1MBX8	Coiled-coil domain containing 50 OS=Bos taurus OX=9913 GN=CCDC50 PE=4 SV=1
A2VE10	Protein CASC4 OS=Bos taurus OX=9913 GN=CASC4 PE=2 SV=1
F1MS84	NOVA alternative splicing regulator 2 OS=Bos taurus OX=9913 GN=NOVA2 PE=4 SV=3
A6QNX3	NTF2-related export protein 2 OS=Bos taurus OX=9913 GN=NXT2 PE=2 SV=1
Q3ZBY7	Sphingolipid delta(4)-desaturase DES1 OS=Bos taurus OX=9913 GN=DEGS1 PE=2 SV=1
Q0II22	E3 ubiquitin-protein ligase RNF126 OS=Bos taurus OX=9913 GN=RNF126 PE=2 SV=1
F1N3H0	WD_REPEATS_REGION domain-containing protein OS=Bos taurus OX=9913 GN=DCAF8 PE=4 SV=1
G3MWY4	Uncharacterized protein OS=Bos taurus OX=9913 PE=4 SV=1
Q3T0K8	ER membrane protein complex subunit 4 OS=Bos taurus OX=9913 GN=EMC4 PE=2 SV=1
F1MXE4	26S proteasome non-ATPase regulatory subunit 6 OS=Bos taurus OX=9913 GN=PSMD6 PE=4 SV=1
F1MXY9	Serine/arginine-rich-splicing factor 6 OS=Bos taurus OX=9913 GN=SRSF6 PE=4 SV=2
O62768	Thioredoxin reductase 1, cytoplasmic OS=Bos taurus OX=9913 GN=TXNRD1 PE=2 SV=3
Q3SYT8	NADPH--cytochrome P450 reductase OS=Bos taurus OX=9913 GN=POR PE=2 SV=3
A0A140T861	RNA-binding protein FUS OS=Bos taurus OX=9913 GN=FUS PE=4 SV=2
E1B9Q4	DNA mismatch repair protein OS=Bos taurus OX=9913 GN=MSH6 PE=3 SV=3
F1MCV3	Cytohesin 1 OS=Bos taurus OX=9913 GN=CYTH1 PE=4 SV=3
Q1RMH8	Sorting nexin-3 OS=Bos taurus OX=9913 GN=SNX3 PE=2 SV=3
E1BEB8	Transcription elongation factor spt6 OS=Bos taurus OX=9913 GN=SUPT6H PE=3 SV=2
A5D7B3	NUPL1 protein OS=Bos taurus OX=9913 GN=NUP58 PE=2 SV=1
Q0VCQ8	Tumor protein p53-inducible protein 11 OS=Bos taurus OX=9913 GN=TP53I11 PE=2 SV=1
F1N318	Vacuolar protein sorting-associated protein VTA1 homolog OS=Bos taurus OX=9913 GN=VTA1 PE=4 SV=1
Q2T9L9	General transcription factor IIF subunit 2 OS=Bos taurus OX=9913 GN=GTF2F2 PE=2 SV=1
A0A3Q1NJN2	UTP4 small subunit processome component OS=Bos taurus OX=9913 GN=UTP4 PE=4 SV=1
A0A3Q1MN33	Glutamate-cysteine ligase catalytic subunit OS=Bos taurus OX=9913 GN=GCLC PE=1 SV=1
Q0VC37	DNAation factor, 45kDa, alpha polypeptide OS=Bos taurus OX=9913 GN=DFFA PE=1 SV=1
A0A3Q1N636	Pre-mRNA-splicing factor 38A OS=Bos taurus OX=9913 GN=PRPF38A PE=4 SV=1
A0A3Q1M5J6	Early endosome antigen 1 OS=Bos taurus OX=9913 GN=EEA1 PE=1 SV=1
Q3ZC65	AUP1 lipid droplet regulating VLDL assembly factor OS=Bos taurus OX=9913 GN=AUP1 PE=2 SV=1
A0A3Q1LP96	Dynactin subunit 4 OS=Bos taurus OX=9913 GN=DCTN4 PE=4 SV=1
Q2TBR9	Uncharacterized protein C12orf31 homolog OS=Bos taurus OX=9913 PE=2 SV=1
F6R2Z7	TRAF family member associated NFKB activator OS=Bos taurus OX=9913 GN=TANK PE=4 SV=1
Q5E9H9	Mycophenolic acid acyl-glucuronide esterase, mitochondrial OS=Bos taurus OX=9913 GN=ABHD10 PE=2 SV=1
A0A3Q1MF92	Chromosome 13 C20orf27 homolog OS=Bos taurus OX=9913 GN=C13H20orf27 PE=4 SV=1
Q17QQ6	WW domain binding protein 4 OS=Bos taurus OX=9913 GN=WBP4 PE=2 SV=1
A0A3Q1MKJ7	Glucosidase 2 subunit beta OS=Bos taurus OX=9913 GN=PRKCSH PE=1 SV=1
A0A3Q1MEL2	Uncharacterized protein OS=Bos taurus OX=9913 PE=3 SV=1
Q3SZF8	Small nuclear ribonucleoprotein Sm D2 OS=Bos taurus OX=9913 GN=SNRPD2 PE=3 SV=1
F1MMD5	X-ray repair cross complementing 6 OS=Bos taurus OX=9913 GN=XRCC6 PE=4 SV=2
Q3MHE2	U4/U6 small nuclear ribonucleoprotein Prp4 OS=Bos taurus OX=9913 GN=PRPF4 PE=2 SV=1
A0A3Q1MQQ6	CAP-Gly domain containing linker protein 1 OS=Bos taurus OX=9913 GN=CLIP1 PE=1 SV=1
Q0V8N4	Proteasome 26S non-ATPase subunit 4 (Fragment) OS=Bos taurus OX=9913 GN=PSMD4 PE=2 SV=1
Q3ZBM5	Sorting nexin-5 OS=Bos taurus OX=9913 GN=SNX5 PE=2 SV=1
A0A3Q1LYJ9	Translocon-associated protein subunit alpha OS=Bos taurus OX=9913 GN=SSR1 PE=1 SV=1
Q2HJC9	Polyglutamine-binding protein 1 OS=Bos taurus OX=9913 GN=PQBP1 PE=2 SV=1
F1MB54	Exosome complex component RRP45 OS=Bos taurus OX=9913 GN=EXOSC9 PE=4 SV=2
Q0P5I8	Golgi to ER traffic protein 4 homolog OS=Bos taurus OX=9913 GN=GET4 PE=2 SV=1
Q2M2U4	Ribonuclease H2 subunit C OS=Bos taurus OX=9913 GN=RNASEH2C PE=2 SV=1
F1MND3	Testis expressed 10 OS=Bos taurus OX=9913 GN=TEX10 PE=4 SV=3
F1MLK1	Remodeling and spacing factor 1 OS=Bos taurus OX=9913 GN=RSF1 PE=4 SV=3
A0A3Q1LWM1	Actin-related protein 10 OS=Bos taurus OX=9913 GN=ACTR10 PE=3 SV=1
F1MNT2	Replication termination factor 2 OS=Bos taurus OX=9913 GN=RTF2 PE=4 SV=1
Q0II91	DnaJ homolog subfamily C member 21 OS=Bos taurus OX=9913 GN=DNAJC21 PE=2 SV=2
E1BB16	GRIP and coiled-coil domain containing 2 OS=Bos taurus OX=9913 GN=GCC2 PE=4 SV=2
F1MZ35	DNA-directed RNA polymerase subunit OS=Bos taurus OX=9913 GN=POLR2I PE=3 SV=2
Q08DM2	2-(3-amino-3-carboxypropyl)histidine synthase subunit 2 OS=Bos taurus OX=9913 GN=DPH2 PE=2 SV=1
Q2KI45	tRNA methyltransferase 10 homolog C OS=Bos taurus OX=9913 GN=TRMT10C PE=2 SV=2
Q07537	Polypeptide N-acetylgalactosaminyltransferase 1 OS=Bos taurus OX=9913 GN=GALNT1 PE=1 SV=1
Q2HJG5	Vacuolar protein sorting-associated protein 35 OS=Bos taurus OX=9913 GN=VPS35 PE=2 SV=1
A0A3Q1MMQ9	SUB1 regulator of transcription OS=Bos taurus OX=9913 GN=SUB1 PE=1 SV=1
A6H714	Mtr4 exosome RNA helicase OS=Bos taurus OX=9913 GN=MTREX PE=2 SV=1
F1ME65	Cytoskeleton associated protein 4 OS=Bos taurus OX=9913 GN=CKAP4 PE=1 SV=1
A5PJW8	DNA-directed RNA polymerase subunit beta OS=Bos taurus OX=9913 GN=POLR2B PE=1 SV=1
Q3T0Y1	Ubiquitin thioesterase OS=Bos taurus OX=9913 GN=OTUB1 PE=1 SV=1
F1N632	Dolichyl-diphosphooligosaccharide--protein glycosyltransferase 48 kDa subunit OS=Bos taurus OX=9913 GN=DDOST PE=3 SV=3
I0J0K0	T-cell surface glycoprotein CD4 OS=Bos taurus OX=9913 GN=CD4 PE=2 SV=1
F1MM55	Nucleoporin 133 OS=Bos taurus OX=9913 GN=NUP133 PE=4 SV=1
F1MPT7	Ribosome biogenesis regulatory protein OS=Bos taurus OX=9913 GN=RRS1 PE=3 SV=1
A0A3Q1N8N0	Baculoviral IAP repeat containing 6 OS=Bos taurus OX=9913 GN=BIRC6 PE=4 SV=1
A0A3Q1LXV7	60S ribosomal protein L36a OS=Bos taurus OX=9913 GN=RPL36A PE=3 SV=1
Q08D98	PPP2R5D protein (Fragment) OS=Bos taurus OX=9913 GN=PPP2R5D PE=2 SV=1
E1BBQ0	Kinetochore associated 1 OS=Bos taurus OX=9913 GN=KNTC1 PE=4 SV=3
A4IFT6	TMED7 protein OS=Bos taurus OX=9913 GN=TMED7 PE=1 SV=1
Q7YR75	39S ribosomal protein L12, mitochondrial OS=Bos taurus OX=9913 GN=MRPL12 PE=1 SV=1
A0A3Q1M0C9	Protein transport protein sec16 OS=Bos taurus OX=9913 GN=SEC16A PE=3 SV=1
A0A3Q1M2U5	VRK serine/threonine kinase 2 OS=Bos taurus OX=9913 GN=VRK2 PE=4 SV=1
A0A3Q1ME19	CD2 associated protein OS=Bos taurus OX=9913 GN=CD2AP PE=4 SV=1
A0A3Q1LUB8	Cytoplasmic linker associated protein 1 OS=Bos taurus OX=9913 GN=CLASP1 PE=4 SV=1
A5PKK1	N(alpha)-acetyltransferase 40, NatD catalytic subunit OS=Bos taurus OX=9913 GN=NAA40 PE=2 SV=1
Q29RT7	TIP41, TOR signaling pathway regulator-like (S. cerevisiae) OS=Bos taurus OX=9913 GN=TIPRL PE=2 SV=1
A0A3Q1MG15	PHD finger protein 8 OS=Bos taurus OX=9913 GN=PHF8 PE=4 SV=1
F1MUK6	COMM domain-containing protein 3 OS=Bos taurus OX=9913 GN=COMMD3 PE=4 SV=3
A0A3Q1M635	Suv3 like RNA helicase OS=Bos taurus OX=9913 GN=SUPV3L1 PE=4 SV=1
F1MGK3	Endoplasmic reticulum lectin 1 OS=Bos taurus OX=9913 GN=ERLEC1 PE=4 SV=2
A0A3Q1MBH8	GRAM domain containing 1B OS=Bos taurus OX=9913 GN=GRAMD1B PE=4 SV=1
Q2KJF9	General transcription factor IIE subunit 2 OS=Bos taurus OX=9913 GN=GTF2E2 PE=2 SV=1
A0A3Q1M986	Polypeptide N-acetylgalactosaminyltransferase OS=Bos taurus OX=9913 GN=GALNT2 PE=3 SV=1
E1BDE3	CTD small phosphatase 1 OS=Bos taurus OX=9913 GN=CTDSP1 PE=4 SV=2
G3N3R5	Golgi integral membrane protein 4 OS=Bos taurus OX=9913 GN=GOLIM4 PE=4 SV=2
A0A3Q1LNU9	Solute carrier family 12 member 9 OS=Bos taurus OX=9913 GN=SLC12A9 PE=4 SV=1
E1BP91	Aminopeptidase OS=Bos taurus OX=9913 GN=NPEPPS PE=1 SV=2
Q32LL2	Stomatin-like protein 2, mitochondrial OS=Bos taurus OX=9913 GN=STOML2 PE=2 SV=1
Q32PG1	AP-3 complex subunit beta-1 OS=Bos taurus OX=9913 GN=AP3B1 PE=2 SV=1
A0A3Q1MA99	Protein tyrosine phosphatase receptor type E OS=Bos taurus OX=9913 GN=PTPRE PE=4 SV=1
E2GEZ5	Translocase of outer mitochondrial membrane 20 OS=Bos taurus OX=9913 GN=Tom20 PE=2 SV=1
A0A3Q1M7N0	Cytosolic Fe-S cluster assembly factor NUBP2 OS=Bos taurus OX=9913 GN=NUBP2 PE=3 SV=1
B0JYN4	Cytosolic iron-sulfur assembly component 2A OS=Bos taurus OX=9913 GN=CIAO2A PE=2 SV=1
F1N0R2	Signal transducer and activator of transcription OS=Bos taurus OX=9913 GN=STAT4 PE=3 SV=3
A0A3Q1M492	HBS1-like protein OS=Bos taurus OX=9913 GN=HBS1L PE=4 SV=1
A0A3Q1MBJ3	PI3K/PI4K domain-containing protein OS=Bos taurus OX=9913 GN=PI4K2A PE=4 SV=1
A5PK74	Ribosomal oxygenase 1 OS=Bos taurus OX=9913 GN=RIOX1 PE=2 SV=1
E1BL71	Flavodoxin-like domain-containing protein OS=Bos taurus OX=9913 GN=TYW1 PE=4 SV=3
Q58DW0	60S ribosomal protein L4 OS=Bos taurus OX=9913 GN=RPL4 PE=2 SV=3
A0A3Q1LJK1	LRR binding FLII interacting protein 1 OS=Bos taurus OX=9913 GN=LRRFIP1 PE=1 SV=1
F1MMA0	Interleukin enhancer binding factor 3 OS=Bos taurus OX=9913 GN=ILF3 PE=4 SV=3
F1MSD2	RuvB-like helicase OS=Bos taurus OX=9913 GN=RUVBL2 PE=3 SV=2
Q3ZBG0	Proteasome subunit alpha type-7 OS=Bos taurus OX=9913 GN=PSMA7 PE=1 SV=1
A0A3Q1LLZ3	UDP-glucose glycoprotein glucosyltransferase 1 OS=Bos taurus OX=9913 GN=UGGT1 PE=4 SV=1
C3V9V7	RNP24 OS=Bos taurus OX=9913 GN=TMED2 PE=3 SV=1
Q0VD48	Vacuolar protein sorting-associated protein 4B OS=Bos taurus OX=9913 GN=VPS4B PE=2 SV=1
A0A3S5ZPB0	Fructose-bisphosphate aldolase OS=Bos taurus OX=9913 GN=ALDOC PE=1 SV=1
A0JNA3	Inosine-5'-monophosphate dehydrogenase 1 OS=Bos taurus OX=9913 GN=IMPDH1 PE=2 SV=2
F1MXY8	Tricarboxylate transport protein, mitochondrial OS=Bos taurus OX=9913 GN=SLC25A1 PE=3 SV=3
Q29RI9	Methionine adenosyltransferase 2 subunit beta OS=Bos taurus OX=9913 GN=MAT2B PE=2 SV=1
A5PJR9	G protein nucleolar 1 (putative) OS=Bos taurus OX=9913 GN=GNL1 PE=2 SV=1
Q17QX2	Zinc finger CCCH-type with G patch domain-containing protein OS=Bos taurus OX=9913 GN=ZGPAT PE=2 SV=1
A0A3Q1LFD0	Brefeldin A-inhibited guanine nucleotide-exchange protein 1 OS=Bos taurus OX=9913 GN=ARFGEF1 PE=4 SV=1
F1MR50	FHA domain-containing protein OS=Bos taurus OX=9913 GN=SLC4A1AP PE=4 SV=2
A7MAZ9	DCP1A protein OS=Bos taurus OX=9913 GN=DCP1A PE=2 SV=1
E1B970	Golgin A3 OS=Bos taurus OX=9913 GN=GOLGA3 PE=4 SV=1
F1N4D3	Cell division cycle 34 OS=Bos taurus OX=9913 GN=CDC34 PE=3 SV=2
Q3T0W3	E3 ubiquitin-protein ligase RNF181 OS=Bos taurus OX=9913 GN=RNF181 PE=2 SV=1
A7YWC9	LOC510385 protein OS=Bos taurus OX=9913 GN=UTP25 PE=2 SV=1
Q0II59	Pyridoxal kinase OS=Bos taurus OX=9913 GN=PDXK PE=2 SV=1
Q0V898	Negative elongation factor E OS=Bos taurus OX=9913 GN=NELFE PE=2 SV=1
J9ZXG5	Integrin alpha V subunit OS=Bos taurus OX=9913 PE=2 SV=1
E1BHW7	Regulator of MON1-CCZ1 OS=Bos taurus OX=9913 GN=RMC1 PE=4 SV=2
Q58DT1	60S ribosomal protein L7 OS=Bos taurus OX=9913 GN=RPL7 PE=2 SV=1
A0A1P8NW48	Sidoreflexin OS=Bos taurus OX=9913 GN=SFXN1 PE=2 SV=1
Q3MHF0	RBM45 protein OS=Bos taurus OX=9913 GN=RBM45 PE=2 SV=2
Q3ZBV3	Protein mago nashi homolog OS=Bos taurus OX=9913 GN=MAGOH PE=2 SV=1
Q3T0L2	Endoplasmic reticulum resident protein 44 OS=Bos taurus OX=9913 GN=ERP44 PE=2 SV=1
P58352	Solute carrier family 2, facilitated glucose transporter member 3 OS=Bos taurus OX=9913 GN=SLC2A3 PE=2 SV=1
A0A3Q1MH63	Exportin 5 OS=Bos taurus OX=9913 GN=XPO5 PE=4 SV=1
F1MBF6	Uncharacterized protein OS=Bos taurus OX=9913 GN=RAB6A PE=4 SV=2
A0A3Q1LYV1	SON DNA binding protein OS=Bos taurus OX=9913 GN=SON PE=4 SV=1
Q1LZB0	DDRGK domain-containing protein 1 OS=Bos taurus OX=9913 GN=DDRGK1 PE=2 SV=1
Q3B7L9	KRR1 small subunit processome component homolog OS=Bos taurus OX=9913 GN=KRR1 PE=2 SV=2
E1BLD1	HECT domain E3 ubiquitin protein ligase 1 OS=Bos taurus OX=9913 GN=HECTD1 PE=4 SV=2
A0A3Q1MBK1	MOB kinase activator 1B OS=Bos taurus OX=9913 GN=MOB1B PE=4 SV=1
G3N3U9	28S ribosomal protein S22, mitochondrial OS=Bos taurus OX=9913 GN=MRPS22 PE=4 SV=2
F1N1Q7	Phosphatidylinositol-3,4,5-trisphosphate dependent Rac exchange factor 1 OS=Bos taurus OX=9913 GN=PREX1 PE=4 SV=3
A7YW33	DNA polymerase delta interacting protein 3 OS=Bos taurus OX=9913 GN=POLDIP3 PE=2 SV=1
F1MFU5	RNA polymerase II associated protein 3 OS=Bos taurus OX=9913 GN=RPAP3 PE=4 SV=3
E1B8X4	NEDD8-activating enzyme E1 regulatory subunit OS=Bos taurus OX=9913 GN=NAE1 PE=3 SV=1
M5FMT2	Magmas-like protein OS=Bos taurus OX=9913 GN=Magmas PE=4 SV=1
A4FV15	PIAS4 protein OS=Bos taurus OX=9913 GN=PIAS4 PE=2 SV=1
F1N1T6	FAST kinase domains 2 OS=Bos taurus OX=9913 GN=FASTKD2 PE=4 SV=1
A0A3Q1MII4	116 kDa U5 small nuclear ribonucleoprotein component OS=Bos taurus OX=9913 GN=EFTUD2 PE=4 SV=1
Q29RK1	Citrate synthase, mitochondrial OS=Bos taurus OX=9913 GN=CS PE=1 SV=1
F1MQU4	BCL2 associated transcription factor 1 OS=Bos taurus OX=9913 GN=BCLAF1 PE=4 SV=2
E1B7C4	Dedicator of cytokinesis 10 OS=Bos taurus OX=9913 GN=DOCK10 PE=3 SV=3
A0A3Q1M9F3	Nucleoporin 155 OS=Bos taurus OX=9913 GN=NUP155 PE=4 SV=1
Q32LM2	Small glutamine-rich tetratricopeptide repeat-containing protein alpha OS=Bos taurus OX=9913 GN=SGTA PE=2 SV=1
A0A3Q1NC75	Calumenin OS=Bos taurus OX=9913 GN=CALU PE=1 SV=1
A0A3Q1LTR8	Torsin 1A interacting protein 1 OS=Bos taurus OX=9913 GN=TOR1AIP1 PE=4 SV=1
G5E567	Importin 9 OS=Bos taurus OX=9913 GN=IPO9 PE=4 SV=2
A4FUD6	Engulfment and cell motility protein 2 OS=Bos taurus OX=9913 GN=ELMO2 PE=2 SV=1
Q148M1	Serine and arginine rich splicing factor 11 OS=Bos taurus OX=9913 GN=SRSF11 PE=2 SV=1
A0A3Q1MYF8	Vacuolar protein sorting 13 homolog C OS=Bos taurus OX=9913 GN=VPS13C PE=4 SV=1
H7BWW0	Coronin OS=Bos taurus OX=9913 GN=CORO1B PE=1 SV=1
E1BEA2	Enhancer of mRNA decapping 3 OS=Bos taurus OX=9913 GN=EDC3 PE=4 SV=3
A6QPV3	GBP4 protein OS=Bos taurus OX=9913 GN=GBP4 PE=2 SV=1
Q32LN1	Ubiquitin-conjugating enzyme E2 H OS=Bos taurus OX=9913 GN=UBE2H PE=2 SV=1
F1N1K9	Trimethylguanosine synthase 1 OS=Bos taurus OX=9913 GN=TGS1 PE=4 SV=2
F1MDR5	Uncharacterized protein OS=Bos taurus OX=9913 GN=MIA2 PE=4 SV=1
A0A3Q1M7S0	Protein tyrosine phosphatase non-receptor type 9 OS=Bos taurus OX=9913 GN=PTPN9 PE=4 SV=1
E1BKE3	Kinesin-like protein OS=Bos taurus OX=9913 GN=KIF3A PE=3 SV=3
F1N1R3	Mitochondrial ribosomal protein L40 OS=Bos taurus OX=9913 GN=MRPL40 PE=4 SV=2
A3KMW0	CCDC97 protein OS=Bos taurus OX=9913 GN=CCDC97 PE=2 SV=1
A0A3Q1M942	tRNA-dihydrouridine(47) synthase [NAD(P)(+)] OS=Bos taurus OX=9913 GN=DUS3L PE=3 SV=1
A0A3Q1MJ95	SET domain containing 2, histone lysine methyltransferase OS=Bos taurus OX=9913 GN=SETD2 PE=4 SV=1
Q2HJ81	Tubulin beta-6 chain OS=Bos taurus OX=9913 GN=TUBB6 PE=2 SV=1
A0A3Q1LLS4	E3 SUMO-protein ligase RanBP2 OS=Bos taurus OX=9913 GN=RANBP2 PE=4 SV=1
Q3SYU9	Major vault protein OS=Bos taurus OX=9913 GN=MVP PE=2 SV=1
A0A3Q1MDR9	Serine/arginine-rich-splicing factor 7 OS=Bos taurus OX=9913 GN=SRSF7 PE=4 SV=1
Q2YDE4	Proteasome subunit alpha type-6 OS=Bos taurus OX=9913 GN=PSMA6 PE=1 SV=1
G3MZZ6	Protein-L-isoaspartate O-methyltransferase OS=Bos taurus OX=9913 GN=PCMT1 PE=3 SV=2
A0A3Q1MCJ7	Uncharacterized protein OS=Bos taurus OX=9913 GN=RPS14 PE=1 SV=1
Q0VCZ8	Acyl-CoA synthetase long-chain family member 1 OS=Bos taurus OX=9913 GN=ACSL1 PE=1 SV=1
A0A3Q1LKZ4	Cullin 4B OS=Bos taurus OX=9913 GN=CUL4B PE=3 SV=1
F1MWH2	Adenosylhomocysteinase like 1 OS=Bos taurus OX=9913 GN=AHCYL1 PE=1 SV=2
Q5EA68	Protein transport protein Sec61 subunit alpha isoform 1 OS=Bos taurus OX=9913 GN=SEC61A1 PE=2 SV=3
E1BM93	Retinol dehydrogenase 11 OS=Bos taurus OX=9913 GN=RDH11 PE=3 SV=2
A0A3Q1MMV9	AT-hook containing transcription factor 1 OS=Bos taurus OX=9913 GN=AHCTF1 PE=4 SV=1
Q08DE9	CUL2 protein OS=Bos taurus OX=9913 GN=CUL2 PE=2 SV=1
Q32KW2	UBX domain-containing protein 1 OS=Bos taurus OX=9913 GN=UBXN1 PE=2 SV=1
A7MB33	GTPBP1 protein OS=Bos taurus OX=9913 GN=GTPBP1 PE=2 SV=1
E1BNA9	Zinc finger ZZ-type and EF-hand domain containing 1 OS=Bos taurus OX=9913 GN=ZZEF1 PE=4 SV=3
Q2YDH3	5', 3'-nucleotidase, cytosolic OS=Bos taurus OX=9913 GN=NT5C PE=2 SV=1
A8E658	PPIG protein OS=Bos taurus OX=9913 GN=PPIG PE=2 SV=1
F1N0Y9	Zinc finger RNA binding protein OS=Bos taurus OX=9913 GN=ZFR PE=4 SV=2
Q3SZ40	Probable ATP-dependent RNA helicase DDX56 OS=Bos taurus OX=9913 GN=DDX56 PE=2 SV=1
A0JN38	Sec1 family domain containing 2 OS=Bos taurus OX=9913 GN=SCFD2 PE=2 SV=1
F1N1A7	MAP kinase-interacting serine/threonine-protein kinase 1 OS=Bos taurus OX=9913 GN=MKNK1 PE=3 SV=1
F1MTI2	Uncharacterized protein OS=Bos taurus OX=9913 GN=CDKN2AIP PE=4 SV=3
A6QPQ5	39S ribosomal protein L1, mitochondrial OS=Bos taurus OX=9913 GN=MRPL1 PE=1 SV=1
P0C2B8	39S ribosomal protein L55, mitochondrial OS=Bos taurus OX=9913 GN=MRPL55 PE=1 SV=1
E1BMA5	Uridine-cytidine kinase OS=Bos taurus OX=9913 GN=UCK2 PE=3 SV=2
Q32PF4	RNF25 protein (Fragment) OS=Bos taurus OX=9913 GN=RNF25 PE=2 SV=1
F6R277	tRNA methyltransferase 1 OS=Bos taurus OX=9913 GN=TRMT1 PE=3 SV=2
A0A3Q1MWL9	Thioredoxin domain-containing protein 12 OS=Bos taurus OX=9913 GN=TXNDC12 PE=1 SV=1
A0A3Q1M0G8	Non-specific serine/threonine protein kinase OS=Bos taurus OX=9913 GN=PAK2 PE=1 SV=1
Q865V6	Macrophage-capping protein OS=Bos taurus OX=9913 GN=CAPG PE=2 SV=1
Q2T9U1	Signal recognition particle 54 kDa protein OS=Bos taurus OX=9913 GN=SRP54 PE=2 SV=1
A6H788	SNRPA1 protein OS=Bos taurus OX=9913 GN=SNRPA1 PE=1 SV=1
F1MU34	Aminopeptidase OS=Bos taurus OX=9913 GN=ERAP1 PE=3 SV=1
Q5E9D3	MICOS complex subunit MIC19 OS=Bos taurus OX=9913 GN=CHCHD3 PE=2 SV=1
E1BPQ8	Cell division cycle 73 OS=Bos taurus OX=9913 GN=CDC73 PE=4 SV=1
A5D788	SGPL1 protein OS=Bos taurus OX=9913 GN=SGPL1 PE=2 SV=1
Q29RL2	Cysteine and histidine-rich domain-containing protein 1 OS=Bos taurus OX=9913 GN=CHORDC1 PE=2 SV=1
A7Z082	ACIN1 protein OS=Bos taurus OX=9913 GN=ACIN1 PE=2 SV=1
F1N441	Aldehyde dehydrogenase family 16 member A1 OS=Bos taurus OX=9913 GN=ALDH16A1 PE=3 SV=3
A0A452DIW0	DBIRD complex subunit ZNF326 OS=Bos taurus OX=9913 GN=ZNF326 PE=3 SV=1
E1BEW6	Exosome component 7 OS=Bos taurus OX=9913 GN=EXOSC7 PE=4 SV=1
F1MTS8	Listerin E3 ubiquitin protein ligase 1 OS=Bos taurus OX=9913 GN=LTN1 PE=4 SV=3
A0A411D3A8	ATP synthase membrane subunit c locus 1 (Fragment) OS=Bos taurus OX=9913 GN=ATP5G1 PE=2 SV=1
A0A3Q1MK62	Transforming growth factor beta-1 proprotein OS=Bos taurus OX=9913 GN=TGFB1 PE=3 SV=1
A4IF88	RCN1 protein OS=Bos taurus OX=9913 GN=RCN1 PE=2 SV=1
Q6TJY3	Ribosomal protein S6 kinase beta-1 OS=Bos taurus OX=9913 GN=RPS6KB1 PE=2 SV=1
E1BLD2	Integrator complex subunit 4 OS=Bos taurus OX=9913 GN=INTS4 PE=4 SV=2
A5PKJ6	Mediator of RNA polymerase II transcription subunit 15 OS=Bos taurus OX=9913 GN=MED15 PE=2 SV=1
A0JN37	ADP-ribosylation factor-like 6 interacting protein 1 OS=Bos taurus OX=9913 GN=ARL6IP1 PE=2 SV=1
E1BN14	G-patch domain and KOW motifs OS=Bos taurus OX=9913 GN=GPKOW PE=4 SV=1
A0A452DIR9	Probable 18S rRNA (guanine-N(7))-methyltransferase OS=Bos taurus OX=9913 GN=BUD23 PE=4 SV=1
A0A3Q1M0H3	tRNA (guanine(37)-N1)-methyltransferase OS=Bos taurus OX=9913 GN=TRMT5 PE=3 SV=1
A0A3Q1LXI8	Transmembrane p24 trafficking protein 3 OS=Bos taurus OX=9913 GN=TMED3 PE=3 SV=1
F1MEM9	Tetratricopeptide repeat domain 19 OS=Bos taurus OX=9913 GN=TTC19 PE=4 SV=3
Q2TBU5	5'-nucleotidase domain-containing protein 1 OS=Bos taurus OX=9913 GN=NT5DC1 PE=2 SV=1
Q1RMR3	Cortactin OS=Bos taurus OX=9913 GN=CTTN PE=1 SV=1
Q3ZBQ0	NAD-dependent protein deacylase sirtuin-5, mitochondrial OS=Bos taurus OX=9913 GN=SIRT5 PE=2 SV=1
A6QLE9	MTMR14 protein OS=Bos taurus OX=9913 GN=MTMR14 PE=2 SV=1
F1MJX8	DnaJ heat shock protein family (Hsp40) member C1 OS=Bos taurus OX=9913 GN=DNAJC1 PE=4 SV=3
A0A3Q1MCT0	General transcription factor IIIC subunit 2 OS=Bos taurus OX=9913 GN=GTF3C2 PE=4 SV=1
P82928	28S ribosomal protein S28, mitochondrial OS=Bos taurus OX=9913 GN=MRPS28 PE=1 SV=2
G3N1S8	Mitochondrial import inner membrane translocase subunit TIM17 OS=Bos taurus OX=9913 GN=TIMM17A PE=3 SV=1
F1N3F6	Chromodomain helicase DNA binding protein 4 OS=Bos taurus OX=9913 GN=CHD4 PE=4 SV=3
A3KN04	Dolichyl-diphosphooligosaccharide--protein glycosyltransferase subunit 1 OS=Bos taurus OX=9913 GN=RPN1 PE=1 SV=1
Q3SZ90	60S ribosomal protein L13a OS=Bos taurus OX=9913 GN=RPL13A PE=2 SV=3
Q24JZ4	Metadherin OS=Bos taurus OX=9913 GN=MTDH PE=1 SV=1
P11017	Guanine nucleotide-binding protein G(I)/G(S)/G(T) subunit beta-2 OS=Bos taurus OX=9913 GN=GNB2 PE=2 SV=3
E1B7Q7	E3 ubiquitin-protein ligase TRIP12 OS=Bos taurus OX=9913 GN=TRIP12 PE=2 SV=2
A3KN22	NEDD8-conjugating enzyme Ubc12 OS=Bos taurus OX=9913 GN=UBE2M PE=2 SV=1
A4FUI2	Small nuclear ribonucleoprotein E OS=Bos taurus OX=9913 GN=SNRPE PE=3 SV=1
A0A3Q1NB02	SAFB like transcription modulator OS=Bos taurus OX=9913 GN=SLTM PE=4 SV=1
A0A3Q1LNK8	Calcium homeostasis endoplasmic reticulum protein OS=Bos taurus OX=9913 GN=CHERP PE=4 SV=1
F1MND5	RNA binding motif protein 12 OS=Bos taurus OX=9913 GN=RBM12 PE=4 SV=2
F1MYH6	Sorting nexin-1 OS=Bos taurus OX=9913 GN=SNX1 PE=4 SV=2
A7Z051	Protein phosphatase 6 regulatory subunit 3 OS=Bos taurus OX=9913 GN=PPP6R3 PE=1 SV=1
E1BGX1	TATA-box binding protein associated factor 15 OS=Bos taurus OX=9913 GN=TAF15 PE=4 SV=3
Q0VCH9	GLI pathogenesis-related 2 OS=Bos taurus OX=9913 GN=GLIPR2 PE=2 SV=1
A0A3Q1MT60	Macrophage migration inhibitory factor OS=Bos taurus OX=9913 GN=MIF PE=1 SV=1
Q5E9Q4	Adaptin ear-binding coat-associated protein 2 OS=Bos taurus OX=9913 GN=NECAP2 PE=2 SV=1
F1MVI8	DDB1 and CUL4 associated factor 13 OS=Bos taurus OX=9913 GN=DCAF13 PE=4 SV=3
A0A3Q1MH83	GTPase-activating protein and VPS9 domain-containing protein 1 OS=Bos taurus OX=9913 GN=GAPVD1 PE=4 SV=1
P61420	V-type proton ATPase subunit d 1 OS=Bos taurus OX=9913 GN=ATP6V0D1 PE=1 SV=1
Q29RH4	THO complex subunit 3 OS=Bos taurus OX=9913 GN=THOC3 PE=2 SV=1
F1N507	B-TFIID TATA-box binding protein associated factor 1 OS=Bos taurus OX=9913 GN=BTAF1 PE=4 SV=3
Q3ZC01	CCR4-NOT transcription complex subunit 7 OS=Bos taurus OX=9913 GN=CNOT7 PE=2 SV=1
E1B8D6	E1A binding protein p300 OS=Bos taurus OX=9913 GN=EP300 PE=4 SV=2
Q2KIK6	Signal transducing adaptor molecule (SH3 domain and ITAM motif) 2 OS=Bos taurus OX=9913 GN=STAM2 PE=2 SV=1
Q0V8Q5	Mitochondrial ribosomal protein L49 (Fragment) OS=Bos taurus OX=9913 GN=MRPL49 PE=2 SV=1
G3N1T7	Ligand dependent nuclear receptor interacting factor 1 OS=Bos taurus OX=9913 GN=LRIF1 PE=4 SV=2
Q58CY3	Chromosome 20 open reading frame 4 OS=Bos taurus OX=9913 GN=C20orf4 PE=2 SV=1
Q2KJ84	Transmembrane emp24 domain-containing protein 5 OS=Bos taurus OX=9913 GN=TMED5 PE=2 SV=1
A0A3Q1M5L7	CCR4-NOT transcription complex subunit 2 OS=Bos taurus OX=9913 GN=CNOT2 PE=4 SV=1
F1ME21	Zinc finger and BTB domain containing 38 OS=Bos taurus OX=9913 GN=ZBTB38 PE=4 SV=3
E1BBK9	Synaptotagmin like 1 OS=Bos taurus OX=9913 GN=SYTL1 PE=4 SV=3
E1BG06	Checkpoint protein OS=Bos taurus OX=9913 GN=HUS1 PE=3 SV=1
Q3T126	Protein cornichon homolog 4 OS=Bos taurus OX=9913 GN=CNIH4 PE=2 SV=1
F1MB08	Alpha-enolase OS=Bos taurus OX=9913 GN=ENO1 PE=3 SV=2
P04272	Annexin A2 OS=Bos taurus OX=9913 GN=ANXA2 PE=1 SV=2
A7E3Q2	Heat shock 70kDa protein 1A OS=Bos taurus OX=9913 GN=HSPA2 PE=2 SV=1
P52193	Calreticulin OS=Bos taurus OX=9913 GN=CALR PE=1 SV=2
Q1RMR2	U1 small nuclear ribonucleoprotein 70 kDa OS=Bos taurus OX=9913 GN=SNRNP70 PE=2 SV=1
E1BBC4	OPA1 mitochondrial dynamin like GTPase OS=Bos taurus OX=9913 GN=OPA1 PE=3 SV=3
Q3SZ99	Peptidylprolyl isomerase OS=Bos taurus OX=9913 GN=AIP PE=2 SV=1
Q2KIR1	U1 small nuclear ribonucleoprotein A OS=Bos taurus OX=9913 GN=SNRPA PE=2 SV=1
F1N5K1	Protein kinase domain-containing protein OS=Bos taurus OX=9913 GN=CDK11B PE=4 SV=2
A0A3Q1MP16	RNA helicase aquarius OS=Bos taurus OX=9913 GN=AQR PE=3 SV=1
E1BEM3	Uncharacterized protein OS=Bos taurus OX=9913 GN=CDV3 PE=1 SV=3
E1BMC4	Golgi brefeldin A resistant guanine nucleotide exchange factor 1 OS=Bos taurus OX=9913 GN=GBF1 PE=4 SV=1
A7YY55	Very-long-chain (3R)-3-hydroxyacyl-CoA dehydratase 3 OS=Bos taurus OX=9913 GN=HACD3 PE=2 SV=1
A0A3Q1LLT2	Exosome complex component RRP43 OS=Bos taurus OX=9913 GN=EXOSC8 PE=4 SV=1
C7FFR6	Dolichol-phosphate mannosyltransferase subunit 1 OS=Bos taurus OX=9913 GN=DPM1 PE=2 SV=1
Q08DS5	60S ribosomal export protein NMD3 OS=Bos taurus OX=9913 GN=NMD3 PE=2 SV=1
F1N5N2	ER membrane protein complex subunit 8 OS=Bos taurus OX=9913 GN=EMC8 PE=4 SV=1
A0A3Q1LY17	Mitochondrial import inner membrane translocase subunit Tim9 OS=Bos taurus OX=9913 GN=TIMM9 PE=4 SV=1
Q58DH7	Sigma non-opioid intracellular receptor 1 OS=Bos taurus OX=9913 GN=SIGMAR1 PE=2 SV=1
A0A452DIL5	Cysteine and glycine-rich protein 2 OS=Bos taurus OX=9913 GN=CSRP2 PE=4 SV=1
Q0VCY6	Lysophospholipid acyltransferase 7 OS=Bos taurus OX=9913 GN=MBOAT7 PE=2 SV=1
A0A140T856	Coatomer subunit alpha OS=Bos taurus OX=9913 GN=COPA PE=4 SV=1
Q2KJ42	Non-POU domain containing octamer binding OS=Bos taurus OX=9913 GN=NONO PE=2 SV=1
Q8WN55	Polypyrimidine tract-binding protein 1 OS=Bos taurus OX=9913 GN=PTBP1 PE=2 SV=1
F1MX61	Splicing factor 3b subunit 1 OS=Bos taurus OX=9913 GN=SF3B1 PE=4 SV=2
A0A3Q1NE05	KH-type splicing regulatory protein OS=Bos taurus OX=9913 GN=KHSRP PE=1 SV=1
Q5E9B7	Chloride intracellular channel protein 1 OS=Bos taurus OX=9913 GN=CLIC1 PE=2 SV=3
Q3T0X6	40S ribosomal protein S16 OS=Bos taurus OX=9913 GN=RPS16 PE=2 SV=3
D3IVZ3	DEAD box polypeptide 3 Y-linked short isoform OS=Bos taurus OX=9913 GN=DDX3Y PE=2 SV=1
G5E6K6	Formin binding protein 1 OS=Bos taurus OX=9913 GN=FNBP1 PE=4 SV=2
Q3SZF2	ADP-ribosylation factor 4 OS=Bos taurus OX=9913 GN=ARF4 PE=2 SV=3
G3N2H3	Eukaryotic translation initiation factor 4 gamma 3 OS=Bos taurus OX=9913 GN=EIF4G3 PE=4 SV=2
A0A3Q1MMJ3	ERO1-like protein alpha OS=Bos taurus OX=9913 GN=ERO1A PE=1 SV=1
A1A4I9	E3 UFM1-protein ligase 1 OS=Bos taurus OX=9913 GN=UFL1 PE=2 SV=1
C1JZ67	Importin subunit alpha OS=Bos taurus OX=9913 PE=2 SV=1
Q0V8D9	XPA binding protein 2 OS=Bos taurus OX=9913 GN=XAB2 PE=2 SV=1
Q2TBG8	Ubiquitin carboxyl-terminal hydrolase isozyme L3 OS=Bos taurus OX=9913 GN=UCHL3 PE=2 SV=1
Q1LZ72	Canopy 2 homolog (Zebrafish) OS=Bos taurus OX=9913 GN=CNPY2 PE=2 SV=1
A7MBA7	X-ray repair cross complementing 5 OS=Bos taurus OX=9913 GN=XRCC5 PE=2 SV=1
P79101	Cleavage and polyadenylation specificity factor subunit 3 OS=Bos taurus OX=9913 GN=CPSF3 PE=1 SV=1
A4FV22	TMEM87A protein OS=Bos taurus OX=9913 GN=TMEM87A PE=2 SV=1
A0A3Q1LXS0	RUNX family transcription factor 2 OS=Bos taurus OX=9913 GN=RUNX2 PE=4 SV=1
Q5E9B8	DNA-directed RNA polymerase II subunit RPB7 OS=Bos taurus OX=9913 GN=POLR2G PE=1 SV=1
E1BKP6	Centrosomal protein 250 OS=Bos taurus OX=9913 GN=CEP250 PE=4 SV=3
A6QQR1	NSUN5 protein OS=Bos taurus OX=9913 GN=NSUN5 PE=2 SV=1
F1MZD5	Dehydrogenase/reductase SDR family member 4 OS=Bos taurus OX=9913 GN=DHRS4 PE=4 SV=2
G5E600	WASH complex subunit 4 OS=Bos taurus OX=9913 GN=WASHC4 PE=4 SV=2
F1MGI9	Haloacid dehalogenase like hydrolase domain containing 5 OS=Bos taurus OX=9913 GN=HDHD5 PE=4 SV=2
E1B972	CD70 molecule OS=Bos taurus OX=9913 GN=CD70 PE=2 SV=2
Q2T9S0	Tubulin beta-3 chain OS=Bos taurus OX=9913 GN=TUBB3 PE=1 SV=1
Q5E9K0	Proteasome subunit beta type-2 OS=Bos taurus OX=9913 GN=PSMB2 PE=1 SV=1
A0A3Q1M1Y6	Parvin gamma OS=Bos taurus OX=9913 GN=PARVG PE=4 SV=1
A0A3Q1MTL8	DCN1-like protein OS=Bos taurus OX=9913 GN=DCUN1D1 PE=4 SV=1
F1MBS7	MALT1 paracaspase OS=Bos taurus OX=9913 GN=MALT1 PE=4 SV=3
A0A3Q1N3E8	Ubiquitin recognition factor in ER associated degradation 1 OS=Bos taurus OX=9913 GN=UFD1 PE=4 SV=1
E1BCI2	E3 ubiquitin protein ligase OS=Bos taurus OX=9913 GN=RNF40 PE=3 SV=2
A7E323	EXOSC10 protein OS=Bos taurus OX=9913 GN=EXOSC10 PE=2 SV=1
Q2T9S4	Glycerol-3-phosphate phosphatase OS=Bos taurus OX=9913 GN=PGP PE=2 SV=1
E1BDW9	Exocyst complex component 2 OS=Bos taurus OX=9913 GN=EXOC2 PE=3 SV=1
Q0V8S0	Hepatocyte growth factor-regulated tyrosine kinase substrate OS=Bos taurus OX=9913 GN=HGS PE=2 SV=1
Q2KJA1	Endophilin-A2 OS=Bos taurus OX=9913 GN=SH3GL1 PE=2 SV=1
E2GEZ1	Translocase of outer mitochondrial membrane 22 OS=Bos taurus OX=9913 GN=Tom22 PE=2 SV=1
A0A3Q1LM43	DnaJ homolog subfamily B member 6 OS=Bos taurus OX=9913 GN=DNAJB6 PE=4 SV=1
A0A3Q1MTF5	CD101 molecule OS=Bos taurus OX=9913 GN=CD101 PE=4 SV=1
Q2YDF6	28S ribosomal protein S35, mitochondrial OS=Bos taurus OX=9913 GN=MRPS35 PE=1 SV=1
F1N397	Leucine rich repeats and WD repeat domain containing 1 OS=Bos taurus OX=9913 GN=LRWD1 PE=4 SV=3
A0A3Q1LSN3	MICOS complex subunit MIC10 OS=Bos taurus OX=9913 GN=MICOS10 PE=3 SV=1
E1BBW7	Reticulophagy regulator family member 3 OS=Bos taurus OX=9913 GN=RETREG3 PE=4 SV=1
Q3T0L3	39S ribosomal protein L17, mitochondrial OS=Bos taurus OX=9913 GN=MRPL17 PE=1 SV=1
Q08DB5	Syntaxin-5 OS=Bos taurus OX=9913 GN=STX5 PE=2 SV=1
Q1LZ79	Gem-associated protein 8 OS=Bos taurus OX=9913 GN=GEMIN8 PE=2 SV=1
A0A3Q1MNL5	Chloride channel protein OS=Bos taurus OX=9913 GN=CLCN7 PE=3 SV=1
Q863B3	Staphylococcal nuclease domain-containing protein 1 OS=Bos taurus OX=9913 GN=SND1 PE=1 SV=1
Q3T0X5	Proteasome subunit alpha type-1 OS=Bos taurus OX=9913 GN=PSMA1 PE=1 SV=1
A4IFB1	Serrate RNA effector molecule homolog OS=Bos taurus OX=9913 GN=SRRT PE=2 SV=1
F1MIT2	Transcription elongation factor A protein 1 OS=Bos taurus OX=9913 GN=TCEA1 PE=4 SV=2
Q3MHE9	MHC Class I JSP.1 OS=Bos taurus OX=9913 GN=JSP.1 PE=2 SV=1
Q3SYT5	PNN protein OS=Bos taurus OX=9913 GN=PNN PE=2 SV=1
E1BCV4	Nucleoporin 98 OS=Bos taurus OX=9913 GN=NUP98 PE=4 SV=2
Q3MHX3	RNA-binding protein 4 OS=Bos taurus OX=9913 GN=RBM4 PE=2 SV=1
A0A3Q1LYM9	DEAD-box helicase 42 OS=Bos taurus OX=9913 GN=DDX42 PE=4 SV=1
O46415	Ferritin light chain OS=Bos taurus OX=9913 GN=FTL PE=2 SV=3
Q0VCU8	Eukaryotic translation initiation factor 3 subunit J OS=Bos taurus OX=9913 GN=EIF3J PE=2 SV=1
Q0II26	Aminoacyl tRNA synthase complex-interacting multifunctional protein 2 OS=Bos taurus OX=9913 GN=AIMP2 PE=2 SV=1
Q3ZCC9	Protein SEC13 homolog OS=Bos taurus OX=9913 GN=SEC13 PE=2 SV=1
A0A140T869	Alpha-endosulfine OS=Bos taurus OX=9913 GN=ENSA PE=1 SV=1
A5D7H7	LOC528833 protein OS=Bos taurus OX=9913 GN=NOP9 PE=2 SV=1
A5PKE2	DnaJ homolog subfamily C member 10 OS=Bos taurus OX=9913 GN=DNAJC10 PE=2 SV=1
E1BJV0	EH domain containing 4 OS=Bos taurus OX=9913 GN=EHD4 PE=3 SV=1
G3N3P0	BICD cargo adaptor 2 OS=Bos taurus OX=9913 GN=BICD2 PE=4 SV=2
F1MD58	Caspase 7 OS=Bos taurus OX=9913 GN=CASP7 PE=3 SV=3
O46563	V-type proton ATPase subunit H OS=Bos taurus OX=9913 GN=ATP6V1H PE=2 SV=2
F6PZJ9	CD58 molecule OS=Bos taurus OX=9913 GN=CD58 PE=4 SV=1
A0A3Q1MUI7	NAD kinase 2, mitochondrial OS=Bos taurus OX=9913 GN=NADK2 PE=1 SV=1
A2VDN2	MBD3 protein OS=Bos taurus OX=9913 GN=MBD3 PE=2 SV=1
Q3ZCB8	ER membrane protein complex subunit 3 OS=Bos taurus OX=9913 GN=EMC3 PE=2 SV=3
A0A3Q1MJ54	Phospholipid-transporting ATPase OS=Bos taurus OX=9913 GN=ATP11B PE=3 SV=1
Q1RMG8	DNA-directed RNA polymerases I and III subunit RPAC2 OS=Bos taurus OX=9913 GN=POLR1D PE=2 SV=1
E1BAK5	Centromere protein C OS=Bos taurus OX=9913 GN=CENPC PE=4 SV=2
Q32LD1	Chromatin complexes subunit BAP18 OS=Bos taurus OX=9913 GN=BAP18 PE=2 SV=1
A6H7D4	1-acylglycerol-3-phosphate O-acyltransferase 6 (Lysophosphatidic acid acyltransferase, zeta) OS=Bos taurus OX=9913 GN=AGPAT6 PE=2 SV=1
A0A3Q1M6K6	Aconitate hydratase, mitochondrial OS=Bos taurus OX=9913 GN=ACO2 PE=1 SV=1
A5D7D9	DEAH-box helicase 15 OS=Bos taurus OX=9913 GN=DHX15 PE=1 SV=1
Q1RMW3	Metastasis associated 1 family member 2 OS=Bos taurus OX=9913 GN=MTA2 PE=2 SV=1
Q5E988	40S ribosomal protein S5 OS=Bos taurus OX=9913 GN=RPS5 PE=2 SV=3
P48820	E3 SUMO-protein ligase RanBP2 (Fragment) OS=Bos taurus OX=9913 GN=RANBP2 PE=2 SV=2
Q0VCV0	Replication protein A subunit OS=Bos taurus OX=9913 GN=RPA1 PE=2 SV=1
F1N1G7	Kinesin-like protein OS=Bos taurus OX=9913 GN=KIF5B PE=1 SV=2
Q3T0S7	Chromosome 14 open reading frame 166 ortholog OS=Bos taurus OX=9913 GN=RTRAF PE=2 SV=1
Q0VC01	Histone deacetylase 2 OS=Bos taurus OX=9913 GN=HDAC2 PE=2 SV=1
E1BDM8	DEAD-box helicase 6 OS=Bos taurus OX=9913 GN=DDX6 PE=1 SV=1
Q3T0Y5	Proteasome subunit alpha type-2 OS=Bos taurus OX=9913 GN=PSMA2 PE=1 SV=3
A6H7B6	DDX24 protein OS=Bos taurus OX=9913 GN=DDX24 PE=2 SV=1
Q3SZC0	Enhancer of rudimentary homolog OS=Bos taurus OX=9913 GN=ERH PE=3 SV=1
A0A3Q1LK61	Ribosomal protein S6 kinase OS=Bos taurus OX=9913 GN=RPS6KA1 PE=3 SV=1
M5FHL5	NADH dehydrogenase [ubiquinone] 1 beta subcomplex subunit 10 OS=Bos taurus OX=9913 GN=NDUFB10 PE=4 SV=1
Q28165	Polyadenylate-binding protein 2 OS=Bos taurus OX=9913 GN=PABPN1 PE=1 SV=3
P21146	Beta-adrenergic receptor kinase 1 OS=Bos taurus OX=9913 GN=GRK2 PE=1 SV=1
P11456	Cation-dependent mannose-6-phosphate receptor OS=Bos taurus OX=9913 GN=M6PR PE=1 SV=1
Q32LM0	Endophilin-B1 OS=Bos taurus OX=9913 GN=SH3GLB1 PE=2 SV=1
F1MS68	Survival of motor neuron-related-splicing factor 30 OS=Bos taurus OX=9913 GN=SMNDC1 PE=4 SV=1
A0A3Q1M6P1	MOB kinase activator 3A OS=Bos taurus OX=9913 GN=MOB3A PE=4 SV=1
A7MAZ3	Ubiquitin-like modifier-activating enzyme 5 OS=Bos taurus OX=9913 GN=UBA5 PE=2 SV=1
A5PKI2	ZC3H11A protein OS=Bos taurus OX=9913 GN=ZC3H11A PE=2 SV=1
Q58DR5	Secretory carrier-associated membrane protein 3 OS=Bos taurus OX=9913 GN=SCAMP3 PE=2 SV=1
A0A3Q1LP83	Phosphoacetylglucosamine mutase OS=Bos taurus OX=9913 GN=PGM3 PE=3 SV=1
F6QT33	Uncharacterized protein OS=Bos taurus OX=9913 GN=RBM34 PE=4 SV=1
Q95118	Cytokine receptor common subunit gamma OS=Bos taurus OX=9913 GN=IL2RG PE=2 SV=1
E1BP52	MTSS I-BAR domain containing 1 OS=Bos taurus OX=9913 GN=MTSS1 PE=4 SV=2
A1A4P4	Growth arrest and DNA damage-inducible proteins-interacting protein 1 OS=Bos taurus OX=9913 GN=GADD45GIP1 PE=2 SV=1
F1MS17	Mitochondrial import inner membrane translocase subunit TIM17 OS=Bos taurus OX=9913 GN=TIMM17B PE=3 SV=1
A0A3Q1MIB8	Caspase 2 OS=Bos taurus OX=9913 GN=CASP2 PE=3 SV=1
F1MQE1	Ribosomal protein S6 kinase OS=Bos taurus OX=9913 GN=RPS6KA4 PE=3 SV=2
Q32LJ0	Small vasohibin-binding protein OS=Bos taurus OX=9913 GN=SVBP PE=3 SV=1
Q3T0V4	40S ribosomal protein S11 OS=Bos taurus OX=9913 GN=RPS11 PE=2 SV=3
A0A3Q1LYU3	Atlastin GTPase 3 OS=Bos taurus OX=9913 GN=ATL3 PE=4 SV=1
G9HR17	MHC class I antigen (Fragment) OS=Bos taurus OX=9913 GN=BoLA PE=3 SV=1
Q3SX41	Luc7-like protein 3 OS=Bos taurus OX=9913 GN=LUC7L3 PE=2 SV=1
E1BM03	WD repeat domain 3 OS=Bos taurus OX=9913 GN=WDR3 PE=4 SV=2
E1BGC5	YLP motif containing 1 OS=Bos taurus OX=9913 GN=YLPM1 PE=4 SV=3
A1A4H6	Probable ATP-dependent RNA helicase DDX27 OS=Bos taurus OX=9913 GN=DDX27 PE=2 SV=1
A0A3Q1LKL7	Adhesion G protein-coupled receptor E5 OS=Bos taurus OX=9913 GN=ADGRE5 PE=3 SV=1
A0A3Q1MQD7	TPD52 like 2 OS=Bos taurus OX=9913 GN=TPD52L2 PE=4 SV=1
P05630	ATP synthase subunit delta, mitochondrial OS=Bos taurus OX=9913 GN=ATP5F1D PE=1 SV=2
A0A3Q1LJF1	Gamma-tubulin complex component OS=Bos taurus OX=9913 GN=TUBGCP2 PE=3 SV=1
A6QNT8	Protein transport protein Sec24A OS=Bos taurus OX=9913 GN=SEC24A PE=2 SV=1
E1BKM0	Factor interacting with PAPOLA and CPSF1 OS=Bos taurus OX=9913 GN=FIP1L1 PE=4 SV=3
A0A3Q1MP25	Acyl-CoA dehydrogenase family member 9 OS=Bos taurus OX=9913 GN=ACAD9 PE=3 SV=1
Q3ZBA6	DnaJ homolog subfamily B member 11 OS=Bos taurus OX=9913 GN=DNAJB11 PE=2 SV=1
A6H7H2	KLC1 protein OS=Bos taurus OX=9913 GN=KLC1 PE=1 SV=1
A0A3Q1M630	Ras GTPase-activating protein 1 OS=Bos taurus OX=9913 GN=RASA1 PE=4 SV=1
Q0VCY8	Phosphoprotein enriched in astrocytes 15 OS=Bos taurus OX=9913 GN=PEA15 PE=2 SV=1
G3MXY7	Metastasis associated 1 OS=Bos taurus OX=9913 GN=MTA1 PE=4 SV=2
A0A3Q1M591	RAB43, member RAS oncogene family OS=Bos taurus OX=9913 GN=RAB43 PE=4 SV=1
Q2T9M8	Synaptosomal-associated protein OS=Bos taurus OX=9913 GN=SNAP23 PE=2 SV=1
Q3SZA1	Rho-related GTP-binding protein RhoF OS=Bos taurus OX=9913 GN=RHOF PE=2 SV=1
A7MBB8	Docking protein 2 OS=Bos taurus OX=9913 GN=DOK2 PE=2 SV=1
A4IFN7	Ubiquitin-protein ligase E3A OS=Bos taurus OX=9913 GN=UBE3A PE=2 SV=1
P61282	NEDD8 OS=Bos taurus OX=9913 GN=NEDD8 PE=3 SV=1
Q2KJD3	Spliceosome-associated protein CWC15 homolog OS=Bos taurus OX=9913 GN=CWC15 PE=2 SV=1
Q2KJ19	Down-regulator of transcription 1 OS=Bos taurus OX=9913 GN=DR1 PE=2 SV=1
P38447	Endonuclease G, mitochondrial OS=Bos taurus OX=9913 GN=ENDOG PE=1 SV=1
A2VE40	DNA replication complex GINS protein SLD5 OS=Bos taurus OX=9913 GN=GINS4 PE=2 SV=1
A0A1L5SMW6	Integrin alpha X OS=Bos taurus OX=9913 GN=ITGAX PE=2 SV=1
F1MQK9	M-phase phosphoprotein 8 OS=Bos taurus OX=9913 GN=MPHOSPH8 PE=4 SV=3
V6F9A6	RNA-binding protein 7 OS=Bos taurus OX=9913 GN=RBM7 PE=4 SV=1
Q0P5A7	Eukaryotic translation initiation factor 4E-binding protein 1 OS=Bos taurus OX=9913 GN=EIF4EBP1 PE=3 SV=1
E1B887	Serine/threonine-protein kinase RIO1 OS=Bos taurus OX=9913 GN=RIOK1 PE=3 SV=1
P01252	Prothymosin alpha OS=Bos taurus OX=9913 GN=PTMA PE=1 SV=2
E1BCW3	ATP-dependent 6-phosphofructokinase OS=Bos taurus OX=9913 GN=PFKP PE=3 SV=3
E1BC59	Protein phosphatase 1 regulatory subunit OS=Bos taurus OX=9913 GN=PPP1R12A PE=4 SV=3
K7QEP9	MHC class I antigen OS=Bos taurus OX=9913 GN=BoLA PE=2 SV=1
F1MHC2	Syntaxin binding protein 2 OS=Bos taurus OX=9913 GN=STXBP2 PE=1 SV=1
Q3ZCE2	ELAV-like protein OS=Bos taurus OX=9913 GN=ELAVL1 PE=2 SV=1
A0A3Q1M3D9	General transcription factor II-I OS=Bos taurus OX=9913 GN=GTF2I PE=4 SV=1
F1MVL2	Short-chain-specific acyl-CoA dehydrogenase, mitochondrial OS=Bos taurus OX=9913 GN=ACADS PE=3 SV=3
P62248	Myeloid-derived growth factor OS=Bos taurus OX=9913 GN=MYDGF PE=2 SV=1
Q3MIC0	60S ribosomal protein L37a OS=Bos taurus OX=9913 GN=RPL37A PE=3 SV=3
Q3ZBW5	Rho-related GTP-binding protein RhoB OS=Bos taurus OX=9913 GN=RHOB PE=2 SV=1
E1BP16	Serine and arginine repetitive matrix 1 OS=Bos taurus OX=9913 GN=SRRM1 PE=4 SV=3
F1N6B6	Nucleoporin 188 OS=Bos taurus OX=9913 GN=NUP188 PE=4 SV=3
A2VDP1	E3 ubiquitin-protein ligase BRE1A OS=Bos taurus OX=9913 GN=RNF20 PE=2 SV=1
A0A3Q1MQ83	Biliverdin reductase A OS=Bos taurus OX=9913 GN=BLVRA PE=3 SV=1
Q2KI74	Tumor necrosis factor receptor type 1-associated DEATH domain protein OS=Bos taurus OX=9913 GN=TRADD PE=2 SV=1
E1BF96	Protein phosphatase 1 regulatory subunit 10 OS=Bos taurus OX=9913 GN=PPP1R10 PE=4 SV=2
E1BH79	Elongation factor like GTPase 1 OS=Bos taurus OX=9913 GN=EFL1 PE=4 SV=2
P25326	Cathepsin S OS=Bos taurus OX=9913 GN=CTSS PE=1 SV=2
Q08DA0	Rab-like protein 6 OS=Bos taurus OX=9913 GN=RABL6 PE=2 SV=1
A0A3Q1MKH2	A-kinase anchoring protein 17A OS=Bos taurus OX=9913 GN=AKAP17A PE=4 SV=1
Q2KID0	Exosome complex component RRP4 OS=Bos taurus OX=9913 GN=EXOSC2 PE=2 SV=1
Q2KI04	SUZ domain-containing protein 1 OS=Bos taurus OX=9913 GN=SZRD1 PE=2 SV=2
A5PJQ7	PX domain containing serine/threonine kinase like OS=Bos taurus OX=9913 GN=PXK PE=2 SV=1
Q3SZ84	BolA-like protein 3 OS=Bos taurus OX=9913 GN=BOLA3 PE=3 SV=1
E1BH78	Small nuclear ribonucleoprotein U5 subunit 200 OS=Bos taurus OX=9913 GN=SNRNP200 PE=4 SV=1
A7Z057	14-3-3 protein gamma OS=Bos taurus OX=9913 GN=YWHAG PE=2 SV=1
F1N365	FLII actin remodeling protein OS=Bos taurus OX=9913 GN=FLII PE=4 SV=2
E1BMP9	Tyrosine-protein kinase OS=Bos taurus OX=9913 GN=ZAP70 PE=3 SV=1
E1B7W1	Thyroid hormone receptor associated protein 3 OS=Bos taurus OX=9913 GN=THRAP3 PE=1 SV=2
Q3T0S6	60S ribosomal protein L8 OS=Bos taurus OX=9913 GN=RPL8 PE=2 SV=3
A0A3Q1MSP7	Dynamin-2 OS=Bos taurus OX=9913 GN=DNM2 PE=3 SV=1
A0A140T871	Glutamate dehydrogenase 1, mitochondrial OS=Bos taurus OX=9913 GN=GLUD1 PE=1 SV=1
F1MX40	DEAD-box helicase 46 OS=Bos taurus OX=9913 GN=DDX46 PE=4 SV=1
Q3YJF4	MHC class I antigen (Fragment) OS=Bos taurus OX=9913 GN=BoLA PE=3 SV=1
E1BEK9	UPF1 RNA helicase and ATPase OS=Bos taurus OX=9913 GN=UPF1 PE=4 SV=2
Q3ZCK9	Proteasome subunit alpha type-4 OS=Bos taurus OX=9913 GN=PSMA4 PE=1 SV=1
G3MXR3	Uncharacterized protein OS=Bos taurus OX=9913 PE=4 SV=1
Q2KIC7	Serine/threonine-protein phosphatase OS=Bos taurus OX=9913 GN=PPP6C PE=2 SV=2
Q2HJ47	Density-regulated protein OS=Bos taurus OX=9913 GN=DENR PE=2 SV=1
Q32LJ9	Eukaryotic translation initiation factor 1B OS=Bos taurus OX=9913 GN=EIF1B PE=2 SV=1
E1BKZ5	Golgin B1 OS=Bos taurus OX=9913 GN=GOLGB1 PE=4 SV=3
A0A3Q1LWJ3	Sphingomyelin phosphodiesterase 4 OS=Bos taurus OX=9913 GN=SMPD4 PE=4 SV=1
F1N026	Integral membrane protein 2B OS=Bos taurus OX=9913 GN=ITM2B PE=4 SV=1
Q5E996	Nucleolar protein 16 OS=Bos taurus OX=9913 GN=NOP16 PE=2 SV=1
Q1JQ95	CKLF-like MARVEL transmembrane domain containing 7 OS=Bos taurus OX=9913 GN=CMTM7 PE=2 SV=1
Q2NKT5	Protein transport protein Sec61 subunit beta OS=Bos taurus OX=9913 GN=SEC61B PE=1 SV=1
E1BF14	POP1 homolog, ribonuclease P/MRP subunit OS=Bos taurus OX=9913 GN=POP1 PE=4 SV=2
Q6PZ03	Cysteine protease ATG4B OS=Bos taurus OX=9913 GN=ATG4B PE=2 SV=1
A0A452DIH1	39S ribosomal protein L44, mitochondrial OS=Bos taurus OX=9913 GN=MRPL44 PE=4 SV=1
F1MZ60	Linker for activation of T cells OS=Bos taurus OX=9913 GN=LAT PE=4 SV=1
Q3ZBG7	Signal recognition particle 19 kDa protein OS=Bos taurus OX=9913 GN=SRP19 PE=2 SV=1
Q58CQ5	Ankyrin repeat and zinc finger domain-containing protein 1 OS=Bos taurus OX=9913 GN=ANKZF1 PE=2 SV=2
A0A3Q1LMH0	Small ArfGAP 1 OS=Bos taurus OX=9913 GN=SMAP1 PE=4 SV=1
A0A3Q1MBQ3	Golgin A4 OS=Bos taurus OX=9913 GN=GOLGA4 PE=4 SV=1
F1MHH9	Uncharacterized protein OS=Bos taurus OX=9913 GN=FCGR2B PE=4 SV=3
E1B8C2	Nucleolar protein with MIF4G domain 1 OS=Bos taurus OX=9913 GN=NOM1 PE=4 SV=2
A0A3Q1MME4	Heterogeneous nuclear ribonucleoproteins A2/B1 OS=Bos taurus OX=9913 GN=HNRNPA2B1 PE=1 SV=1
A5D973	Alpha isoform of regulatory subunit A, protein phosphatase 2 OS=Bos taurus OX=9913 GN=PPP2R1A PE=2 SV=1
A0JN52	Splicing factor 3B subunit 3 OS=Bos taurus OX=9913 GN=SF3B3 PE=2 SV=1
F1MHU9	CCR4-NOT transcription complex subunit 1 OS=Bos taurus OX=9913 GN=CNOT1 PE=4 SV=3
Q3T0E7	Serine/threonine-protein phosphatase PP1-alpha catalytic subunit OS=Bos taurus OX=9913 GN=PPP1CA PE=2 SV=1
Q29RI6	Calcium-binding protein 39 OS=Bos taurus OX=9913 GN=CAB39 PE=2 SV=1
A8E4P2	FARSB protein OS=Bos taurus OX=9913 GN=FARSB PE=2 SV=1
Q3SZC4	NSFL1 cofactor p47 OS=Bos taurus OX=9913 GN=NSFL1C PE=2 SV=1
E1BB38	Signal recognition particle subunit SRP72 OS=Bos taurus OX=9913 GN=SRP72 PE=1 SV=1
Q24K19	Nucleoporin 54kDa OS=Bos taurus OX=9913 GN=NUP54 PE=2 SV=1
Q3T108	Proteasome subunit beta type-4 OS=Bos taurus OX=9913 GN=PSMB4 PE=1 SV=1
Q3SWY7	Splicing factor 3a subunit 3 OS=Bos taurus OX=9913 GN=SF3A3 PE=2 SV=1
F1MM23	CDK5 regulatory subunit associated protein 3 OS=Bos taurus OX=9913 GN=CDK5RAP3 PE=4 SV=1
Q0VCT3	Telomeric repeat-binding factor 2-interacting protein 1 OS=Bos taurus OX=9913 GN=TERF2IP PE=2 SV=1
Q2HJD0	FAS-associated factor 2 OS=Bos taurus OX=9913 GN=FAF2 PE=2 SV=1
A0A3Q1LNR7	MAP7 domain containing 1 OS=Bos taurus OX=9913 GN=MAP7D1 PE=1 SV=1
E1BKE1	FRY like transcription coactivator OS=Bos taurus OX=9913 GN=FRYL PE=4 SV=3
Q3T133	Transmembrane emp24 domain-containing protein 9 OS=Bos taurus OX=9913 GN=TMED9 PE=1 SV=1
F1MFJ6	Uncharacterized protein OS=Bos taurus OX=9913 GN=TBL1XR1 PE=4 SV=3
F1N1Q3	Uncharacterized protein OS=Bos taurus OX=9913 GN=RFTN1 PE=4 SV=3
A6H772	Serine/threonine-protein phosphatase 4 catalytic subunit OS=Bos taurus OX=9913 GN=PPP4C PE=1 SV=1
E1BE82	Pumilio RNA binding family member 1 OS=Bos taurus OX=9913 GN=PUM1 PE=4 SV=2
A3KMW1	NUP43 protein OS=Bos taurus OX=9913 GN=NUP43 PE=2 SV=1
F1MM34	Catenin alpha-1 OS=Bos taurus OX=9913 GN=CTNNA1 PE=4 SV=2
Q24K07	Vacuolar protein sorting-associated protein 11 homolog OS=Bos taurus OX=9913 GN=VPS11 PE=2 SV=1
Q5EA00	Stromal membrane-associated protein 2 OS=Bos taurus OX=9913 GN=SMAP2 PE=2 SV=1
A4FUC0	39S ribosomal protein L37, mitochondrial OS=Bos taurus OX=9913 GN=MRPL37 PE=1 SV=1
A0A3Q1N4D8	DNA polymerase delta subunit 2 OS=Bos taurus OX=9913 GN=POLD2 PE=4 SV=1
A4FUB5	COMM domain containing 10 OS=Bos taurus OX=9913 GN=COMMD10 PE=2 SV=1
A0A3Q1MWS0	RNA polymerase II subunit A C-terminal domain phosphatase OS=Bos taurus OX=9913 GN=CTDP1 PE=4 SV=1
A7MB59	MAD1L1 protein OS=Bos taurus OX=9913 GN=MAD1L1 PE=2 SV=1
P05689	Cathepsin Z OS=Bos taurus OX=9913 GN=CTSZ PE=2 SV=2
Q3T0F2	Trafficking protein particle complex subunit 2 OS=Bos taurus OX=9913 GN=TRAPPC2 PE=2 SV=1
P79345	NPC intracellular cholesterol transporter 2 OS=Bos taurus OX=9913 GN=NPC2 PE=1 SV=1
F1ML50	Solute carrier family 35 member E1 OS=Bos taurus OX=9913 GN=SLC35E1 PE=4 SV=2
Q2TBQ5	60S ribosomal protein L7a OS=Bos taurus OX=9913 GN=RPL7A PE=2 SV=3
O77974	MHC class I antigen OS=Bos taurus OX=9913 GN=Man3 PE=3 SV=1
[truncated: 2,213 more rows]

## Sheet: Suppl. Table S2
Accession	Ratio: (Th2) / (Naive)
F2Z4F9	0.279322
A5D7N2	0.246558
A0A3Q1MEU7	0.279322
P62803	0.257028
A1A4R1	0.22688
Q3ZBX9	0.0712977
A4IFU5	0.211686
F1MLQ1	0.228458
Q3ZBU7	4.40762
A0A140T897	0.0457527
A0A3Q1LQR2	1.94531
B0JYQ0	0.15822
G3MWV5	0.186856
F2Z4I6	0.170755
A7MAZ5	0.246558
A0A452DIF5	0.190782
A6QQ28	0.283221
Q2HJ81	2.32947
P68432	0.381565
E1BGN3	0.260616
E1BFB0	0.343885
A0A3Q1NKL1	0.334482
E1B9F6	2.15846
Q5E9F8	0.179244
G3MWH4	0.395021
D4QBB4	0.0480273
A0A5F2P3F6	0.343885
Q71SP7	2.01391
A5PK20	0.400535
A0A3Q1MXU7	0.336808
E1B7N8	0.29937
Q0VCA5	0.188156
F1N5F3	0.348686
Q27975	0.200267
A4FUD9	2.46229
E1BJK2	0.0802141
A0A3Q1MPB8	0.217638
G3N131	0.257028
P01966	0.0563282
P55859	2.69447
P12763	0.0356489
F1MJI7	0.309927
Q6B855	0.275476
Q2KJJ4	0.25
P04264	0.356013
E1BM22	0.222211
P11116	3.63008
F6QQ96	3.11666
F1MSB7	5.85634
O97680	3.78423
F1MUU9	0.332171
P02081	0.0818996
A0A3Q1LPX4	5.77572
A0A3Q1M8R6	0.323088
P40673	0.29937
Q8MJG1	0.281265
F6QND5	0.036906
Q3SZ18	3.83706
F1N5H8	0.397768
E1BMZ9	2.34567
F1N3A1	0.047039
Q32LC7	2.31338
P62833	2.01391
Q28178	0.111105
F1N1I1	2.58471
Q08DU9	0.257028
A0A3Q1LZ55	2.65737
F1MSQ9	0.29937
G5E5A8	0.0830429
E1BIG6	4.19887
A0A3Q1MQ59	4.72397
E1BME6	2.54912
P35908	0.339151
A0A3Q1MKK7	0.238159
P48734	3.11666
F1MAV0	0.0363979
Q3YFF9	0.360982
P20000	0.168404
P34955	0.0441942
A0A452DI43	2.11404
Q2HJ65	0.275476
A0A3Q1LMZ8	0.339151
F1MWU9	0.15283
Q3T168	2.67586
H6V5F3	2.01391
E1BI58	2.75108
A1L5B0	0.366021
F1MMU4	0.101532
Q865V6	3.86375
A7E320	3.11666
F6RBQ9	2.12874
Q0IIH5	2.21914
G3N0V2	0.271684
P02313	0.266093
A5PK33	6.63456
Q9XSA7	2.56685
P12624	2.17347
P35527	0.389582
A6QQV8	0.225313
F1MMB8	0.400535
F5XVA9	0.14161
P15497	0.0361465
F1MUN7	0.348686
Q1LZB6	2.36199
Q0VCD7	3.45815
A0A3Q1N127	0.279322
Q3SZZ9	0.0334929
Q6IE76	3.22657
Q3T0J0	2.09943
E1BPK0	0.363493
Q1LZ95	3.24901
Q3B7M9	0.339151
A0A0A8J2N9	6.27667
P02316	0.20166
F1MPG6	0.277392
E1BF88	2.9897
F6QEU6	0.264255
A0A3Q1MWG7	0.358489
G3MY00	0.203063
G3X6N3	0.228458
A0A3Q1LTU7	4.65893
A0A3Q1MH07	3.29436
P55052	2.21914
E1B726	0.314253
Q9TVC8	2.41162
Q2KIC1	2.42839
P58352	2.65737
A0A3Q1LN63	0.262429
Q3ZBE9	2.39496
F1MYW7	2.07053
P81425	2.21914
Q28194	0.148651
Q0P594	0.279322
Q30302	3.31728
F1N6E0	0.225313
A0A3Q1MTE4	0.314253
A0A3Q1MUI5	2.31338
Q2KHU0	2.04202
Q2YDE9	2.15846
A6QQX0	2.90795
Q864L6	10.4107
Q3ZCD7	2.14355
Q17QJ1	0.386891
A0A3Q1MJD6	2.28153
Q29S11	0.353553
A0A3Q1M7S5	0.329877
Q3ZBX0	2.53151
A7YWJ7	0.389582
Q8MJJ7	0.336808
A5D7R8	2.51403
A1A4Q4	0.303549
Q9TU26	3.91768
E1BC36	2.14355
Q4PJW3	2.31338
A0A3Q1LN52	0.25349
F1MB18	9.00047
Q3ZBW8	2.23457
A0A3Q1LTA5	0.151774
Q29RM3	2.41162
P80513	2.42839
A0A3Q1NDE1	0.277392
A0A3Q1N3L4	0.378929
A0A3Q1M2B2	0.120742
Q8MHP0	3.41054
Q0V8R5	0.238159
F1MJH1	0.0973956
A0A3Q1MBS7	0.312083
A0A3Q1MGP0	0.186856
Q0II87	0.41466
A0A452DI87	0.384219
A0A3Q1LQU5	2.56685
O46414	5.89708
P46195	0.285191
O97919	20.1122
Q01321	0.255253
A6QLW3	0.400535
Q08DQ6	0.360982
A0A3Q1LWS9	0.411796
A6QPE8	1.93187
P08779	0.297302
F1MW44	0.122428
G3MXJ5	2.82843
G3X6L5	2.73208
E1BDP3	0.309927
G5E580	0.334482
A0A3Q1LUU0	0.381565
E1BCF2	0.332171
Q9N179	0.258816
F1MD83	0.0563282
Q3T0W2	0.343885
A2VDV2	0.389582
Q32PA5	2.75108
A0A3Q1M703	0.420448
F1MJ35	0.392292
Q2KJH9	0.316439
A0A3Q1MEG8	4.25748
Q3T105	2.26577
A5D7L5	4.02782
P00435	0.185565
A9QXB7	4.50023
F1MB04	2.15846
Q0VCQ8	3.05252
A0A3Q1MDC6	2.08493
A0A3Q1NBQ9	4.37717
P23727	0.435275
E1BG62	0.384219
A4IF91	2
F1N2K1	0.283221
P08487	0.426317
Q3ZCD0	3.75809
A6QLZ0	0.100134
Q2YDK4	0.164938
Q0VC27	0.312083
F1N6G1	0.283221
A0A3Q1LX72	0.142595
A0A3Q1M630	2.04202
O02741	0.220676
G1K192	2.31338
Q3T0Z7	0.403321
F1MC39	0.384219
F1MK07	2.62079
A0A3Q1LZ09	0.231647
F1MQ65	2.96905
Q3ZBS7	0.346277
A0A3Q1MDT8	0.358489
Q58D62	0.0902456
E1B8S2	0.378929
Q7SIH1	0.279322
Q2TBU0	2.28153
E1BJV0	2.09943
A0A3Q1M537	5.81589
A0A3Q1LPW5	2.04202
F1MTN1	0.181747
Q2KIX0	2.73208
E1B7F5	2.17347
G3N251	2.11404
A5D9A8	3.29436
F1MYQ1	2.02792
A0A3Q1LGY9	0.171943
Q3ZC83	2.54912
F1N026	2.20381
A7E3C7	0.186856
P00430	0.343885
F1MX39	0.463294
F1MRZ8	0.307786
O18778	2.73208
A6QR39	0.400535
A0A3Q1LSK6	2.75108
A0A3Q1M211	0.0693481
A0A3Q1M5M9	0.312083
A6H7D3	0.289172
G3X702	0.173139
A0A3Q1MBE1	0.0927827
A0A4D6BI68	0.121582
A0A3Q1MFR4	0.293209
A2VDP5	2.34567
Q3MHR3	0.397768
A2VDV6	0.403321
Q58DM3	2.07053
G5E5Q8	0.356013
G3MWN1	2.53151
Q3T0B0	0.336808
Q17QJ0	2.49666
A2VDS1	0.14161
B6VAP8	0.072293
G3MZ52	0.438303
A6QPY8	0.447513
Q2KIX6	0.392292
Q1JQ95	2.75108
Q0VCP1	4.28709
A0A3Q1LN22	0.438303
P01045	0.228458
Q3T0E0	2.82843
A0A452DI18	0.384219
Q0V8D3	2.41162
P27674	4.50023
Q08DQ9	2.78949
A6QR07	0.432269
Q8HYY3	0.213159
P02639	0.386891
A0A452DJF1	0.243164
Q0VBZ5	3.55537
E1BF69	0.435275
Q7YRC6	2.25012
G3N0S9	0.148651
Q9N2I8	0.435275
Q6EWQ6	2.04202
F1MW01	2.62079
Q8HZJ5	0.371131
Q5E9B2	2.60268
Q0VCK2	5.09824
A0A3Q1LXK7	0.397768
Q3T103	0.366021
P25417	0.411796
A0A452DI04	2.54912
A4IFM5	2.56685
P79135	0.438303
G3N2N2	0.297302
Q1ADE7	2.07053
A5PKH8	0.289172
A5PK80	0.441351
Q3SYY7	2.44528
A5PKM0	0.386891
F1N2D3	2.34567
Q0P5A5	4.05584
E1BKS1	2.8481
A0A3S5ZPS0	2.11404
Q6J1J1	4.31691
F1MVT7	2.02792
P81644	0.0337259
F1MLS2	2.51403
F1MF78	0.204476
Q2KIB0	0.25349
I7CT57	0.0647041
A0A3Q1LYL5	0.435275
A0A3Q1N4K8	0.392292
G3N3D6	2.67586
A0A3Q1LU54	0.271684
A4IFA7	0.312083
A0A3Q1MRC2	4.34694
P21839	0.336808
F1ME02	0.366021
E1BF67	2.41162
Q2YDN8	0.327598
F1MTX9	3.73213
A0A3Q1LH01	2.63902
A0A3Q1ND53	0.358489
F1MXX7	0.429283
F1MEM4	0.334482
Q3MHR4	0.423373
E1BD59	2.12874
F1MYW0	2.65737
E1BAZ9	0.450625
A0A3Q1MRT6	4.19887
Q29RT6	2.69447
Q3ZBC2	4.69134
Q0VCM6	2.65737
Q8HYW2	5.38893
Q3SZB1	0.403321
F1MXS4	2.02792
Q0IIJ2	0.134904
G3N2G3	2.23457
P25930	2.39496
A0A452DI66	0.0877778
F1MXK2	2.56685
Q2KHW2	5.02805
A5D7N6	3.45815
Q3T0N9	5.06303
A0A3Q1NAH6	2.28153
G3N1U1	0.160428
A2VDN0	2.75108
A0A3Q1M023	5.31474
Q0IID8	0.297302
Q0P5D3	2.42839
P21327	0.384219
Q1RMK2	0.244855
Q17QE0	2.39496
Q28090	3.07375
A6H7B3	2.71321
Q9TTE1	0.138696
F1MKN2	0.105843
A0A3Q1MBY2	0.441351
A0A3Q1NBN7	2.78949
P19035	0.386891
Q2HJD7	0.267943
F1MW26	4.95883
F1MQX0	0.408951
Q3MHM3	3.63008
A5D7R0	0.386891
Q0VC13	0.417544
A0A452DKA8	2.56685
A0A3Q1MIG6	0.368567
A4FV61	0.239816
F1MYN9	0.408951
B3STV1	3.45815
Q0VCI1	0.411796
Q24K14	0.411796
Q29451	0.473029
A2VDW3	2.58471
Q2T9V8	0.329877
A0A3Q1MYQ9	2.94854
F1N1V2	0.30566
A5PK58	0.423373
Q0VC17	2.26577
Q17QA1	9.64646
F1MM05	0.447513
Q95121	0.0896222
Q2TBG2	0.400535
F6Q9E6	2.28153
F1MPZ9	2.90795
E1BKY0	0.348686
A0A3Q1MSW2	0.0547879
A0A3Q1MCV0	0.381565
A0A3Q1LJV9	2.80889
A0A3Q1LX60	7.72749
Q58DK0	0.293209
O19135	3.70635
A6QLQ6	0.164938
J9QDU2	0.0591286
Q58CY2	0.0813339
A6H7E3	0.348686
A0A3Q1MCW9	2.07053
A0A3Q1LTV0	0.358489
A0A3Q1NIE5	0.220676
G3N3R5	4.75683
Q2TBU8	0.360982
Q2YDK1	0.426317
E1BB32	0.0769465
E1BJZ4	3.27161
E1BC42	2.28153
Q32LK2	3.31728
F1MXY2	0.323088
A0A3Q1MRM2	0.0270168
E1BI56	0.0818996
A8E4P3	0.214641
Q29448	0.420448
Q5EA61	0.267943
E1BJX8	0.366021
Q3ZCI1	0.334482
E1BMJ0	0.303549
F6K7J1	3.605
A0A3Q1LY28	0.291183

## Sheet: Suppl. Table S3
Accession	Ratio: (TH1) / (Naive)
Q3MHM3	13.737
A0A0A8J2N9	11.3137
A0A3Q1M023	10.7779
Q8MHP0	10.1261
A0A3Q1MEG8	9.38268
Q30302	8.9383
A0A3Q1LPX4	8.63383
Q6J1J1	8.63383
F1MXK2	7.06162
Q3ZBC2	7.01285
A0A3Q1LX60	7.01285
Q9TVC8	6.9644
A0A3Q1N557	6.86852
A0A3Q1LN34	6.72717
A0A3Q1MQ59	6.6807
Q0VCD7	6.58873
A2VDV6	6.54322
Q0P5A5	6.40856
E1BF88	6.19026
A5D7N6	6.10504
F1MTX9	6.02099
Q0VBZ5	5.85634
A0A3Q1NNJ6	5.85634
G3MWN1	5.81589
F6QQ96	5.6962
A0A3Q1NBA4	5.6962
Q08DQ9	5.61778
A0A3Q1LXL8	5.57897
O77788	5.50217
Q8HYW2	5.38893
F1MPZ9	5.38893
E1BIG6	5.31474
Q9TU26	5.27803
A9QXB7	5.27803
A7E320	5.16941
F1MQ84	5.1337
F1MW01	5.09824
A0A452DI04	4.99332
F1MYW0	4.99332
A6H7B3	4.99332
Q1LZ95	4.95883
Q9TVC4	4.95883
Q2KHW2	4.92458
E1BME6	4.85678
Q17QJ0	4.82323
Q3SZ18	4.78991
Q32PA5	4.78991
O46414	4.75683
A4FUD9	4.72397
P48734	4.72397
Q1LZB6	4.72397
A0A3Q1LN49	4.72397
B3STV1	4.65893
Q29RT6	4.56305
F1MDU7	4.53154
P37980	4.53154
F6Q9E6	4.53154
Q9XSA7	4.46915
F1MGX8	4.46915
Q1ADE7	4.40762
E1BC42	4.40762
E1BMZ9	4.34694
Q0P5C2	4.31691
Q3ZC83	4.31691
A6QQX0	4.22807
F1MTU0	4.22807
Q76LV1	4.19887
A5D7R8	4.19887
P27674	4.19887
E1BJZ4	4.19887
A0A3Q1N2V4	4.16986
A0A3Q1MRT6	4.16986
Q2KIC1	4.11246
A0A3Q1MJD6	4.08405
G1K192	4.08405
P25930	4.08405
A2VDW3	4.08405
P29702	4.05584
A0A452DJD3	4.05584
Q3SYV6	4.02782
Q3T0C6	4.02782
Q0VCX5	4
Q9N2J2	4
G3N2V5	3.94493
F1MK07	3.94493
E1BIA7	3.91768
A4IFM5	3.91768
A6H7D7	3.89062
A0A3Q1N4A7	3.89062
F1MUQ7	3.89062
A0A3Q1ND27	3.89062
Q6IE76	3.86375
A0A3Q1LTU7	3.83706
A6QNM3	3.83706
Q5E9B2	3.81055
A0A3Q1N7N8	3.81055
E1BM34	3.78423
A3KN39	3.75809
Q17QE0	3.75809
Q0VCZ3	3.73213
A6QPE8	3.70635
A0A3Q1NBQ9	3.70635
A0A3Q1LQU5	3.68075
Q7YRC6	3.65533
O41515	3.65533
A0A3Q1MCW9	3.65533
A0A3Q1M537	3.605
A0A3Q1LPW5	3.605
F1MY46	3.605
Q01061	3.5801
A5D9A8	3.5801
F1MY63	3.5801
E1BGY1	3.5801
A0A3Q1LH01	3.53081
Q5E9Y0	3.50642
G3MZ54	3.50642
A0A3Q1NBN7	3.50642
Q2KHU0	3.4822
A0A3Q1LSK6	3.4822
F1MVT7	3.4822
A4IF91	3.45815
F1MEW4	3.45815
Q3ZBI3	3.45815
E1B9F6	3.43426
Q32P59	3.43426
A0A3Q1MD85	3.43426
A6QL93	3.41054
Q32LD6	3.41054
E1BN25	3.38698
Q3SYS9	3.38698
A7Z061	3.38698
Q32LK2	3.38698
Q0P5N5	3.38698
A1L530	3.36359
Q71SP7	3.34035
A0A3Q1M792	3.34035
A0A3Q1NK84	3.34035
A6QPX8	3.29436
Q0VCK2	3.29436
E1BG87	3.29436
Q2YDG3	3.27161
A6QPN6	3.27161
F1MAW0	3.27161
A0A3Q1MSK4	3.24901
F1MXS4	3.22657
E1BB52	3.20428
Q2KII6	3.20428
Q3ZBL9	3.20428
F1MYQ1	3.18215
F1MSM4	3.18215
A0A3Q1LM83	3.13834
A0A140T8C7	3.09513
F1MM32	0.628507
Q0P5J8	0.628507
Q0VCI1	0.628507
F1N2G5	0.615572
F1MXY2	0.615572
Q95JH2	0.61132
A0JNC1	0.607097
E1B8S2	0.602904
F1MRG0	0.602904
E1BF69	0.602904
A5PKK5	0.598739
Q58CY6	0.598739
F1MUP9	0.586417
Q9BE39	0.586417
A6QR07	0.586417
A0A3Q1MBY2	0.586417
A0A3Q1MIG6	0.586417
G3X6L8	0.578344
G5E5M5	0.578344
P63212	0.578344
Q58CP9	0.574349
Q3SWX3	0.574349
A4IF78	0.566442
G5E5Q8	0.566442
A6QLR3	0.562529
A0A3Q1MZU3	0.558644
A0JNB0	0.554785
A0A3Q1LUU0	0.554785
F1N6G1	0.554785
E1B822	0.550953
Q29RH9	0.550953
P00430	0.550953
Q3SZP2	0.550953
A6QR39	0.550953
Q2TA49	0.547147
P23727	0.547147
E1BG62	0.547147
Q08DB4	0.543367
P08779	0.543367
A6H732	0.543367
Q29451	0.543367
F1MX39	0.539614
P45478	0.539614
A0A3Q1MA62	0.532185
Q2KIX6	0.532185
A0A452DJF1	0.532185
Q9N2I8	0.532185
A0A3Q1ND53	0.532185
Q8MJJ7	0.524858
F6QGM3	0.521233
F1MRZ8	0.521233
A0A0S1S4M0	0.521233
Q3SYV4	0.517632
P17697	0.517632
A0A3Q1MDT8	0.517632
A0A3Q1LN22	0.517632
Q2T9V8	0.517632
Q3MHW9	0.517632
G5E580	0.514057
A0A3Q1LXK7	0.510506
A0A140T857	0.510506
A0A3Q1LYL4	0.510506
A5PK58	0.50698
A0A3Q1M7S5	0.5
A0A3Q1NKL1	0.493116
Q2KJC5	0.493116
A2VDV2	0.493116
F1MXX7	0.493116
Q2KIM0	0.493116
P68432	0.48971
P10575	0.486327
F1MTT7	0.486327
F1MC39	0.482968
Q3MHR4	0.482968
A6QLZ6	0.479632
Q3SZB1	0.479632
Q0IID8	0.479632
A0A3Q1N127	0.473029
Q3ZBN0	0.473029
Q4L0H5	0.473029
Q3ZBV4	0.473029
A6QQR5	0.473029
F1MYN9	0.473029
E1BI70	0.469761
Q2YDN8	0.469761
A0A3Q1MCD5	0.469761
Q2TBG2	0.469761
Q3B7M9	0.466516
A0A452DI03	0.466516
A6QQ28	0.463294
A0A3Q1MFR4	0.463294
Q3MHR3	0.460094
A0A5F2P3F6	0.456916
F1MMB8	0.456916
M5FI44	0.45376
F1MU84	0.450625
Q8MJG1	0.447513
Q9N179	0.447513
F1MN16	0.447513
Q9TU03	0.444421
F1MWQ2	0.444421
E1BN61	0.444421
P19238	0.441351
A0A3Q1M8R6	0.438303
Q3T0Z7	0.438303
Q08DQ6	0.435275
F1MUU9	0.432269
F1N6E0	0.432269
Q0P594	0.429283
Q2KJJ4	0.426317
A0A3Q1M703	0.426317
G3N0S9	0.426317
F1N1V2	0.423373
E1B7N8	0.417544
A5D7N2	0.411796
F1MLQ1	0.411796
F1MJI7	0.411796
P46195	0.408951
Q01321	0.408951
P00435	0.408951
P30932	0.408951
G3N2N2	0.408951
Q3ZCI1	0.408951
A7MAZ5	0.406126
P40673	0.403321
Q29S11	0.395021
Q56K11	0.395021
A0A3Q1LY28	0.395021
E1BDP3	0.392292
Q2KJH9	0.392292
Q7SIH1	0.392292
Q58DK0	0.389582
P02313	0.386891
Q8HZJ5	0.386891
A1A4R1	0.384219
F1MUN7	0.384219
A0A3Q1N4K8	0.384219
A1L5B0	0.381565
Q0V8R5	0.381565
G3X702	0.381565
A4IFA7	0.381565
F1MK41	0.381565
P25417	0.378929
A0A3Q1N3L4	0.376312
A0A3Q1MBS7	0.376312
Q1RMK2	0.376312
Q3T0W2	0.373712
P46193	0.371131
A0A3Q1M5M9	0.368567
A0A3Q1LN63	0.363493
A0A3Q1LN52	0.363493
Q2HJ65	0.360982
E1BKY0	0.358489
E1BM22	0.353553
F1N2K1	0.353553
F1MPG6	0.351111
A6H7E3	0.351111
F2Z4F9	0.348686
F1MSQ9	0.348686
A0A3Q1LWS9	0.348686
Q08DU9	0.346277
P02639	0.343885
A5PKH8	0.339151
P62803	0.336808
A0A452DIF5	0.329877
A0A3Q1MGP0	0.327598
F1MJ35	0.325335
A6QLQ6	0.323088
B0JYQ0	0.320856
Q2KIB0	0.320856
A0A4D6BI68	0.314253
G3MWV5	0.312083
A0A3Q1LZ09	0.309927
A6QQV8	0.30566
A0A3Q1MTE4	0.303549
A7E3C7	0.301452
P02316	0.29937
G3N1U1	0.29937
Q0P5E8	0.29937
A4IFU5	0.293209
Q27975	0.291183
A0A3Q1MKK7	0.289172
E1BPK0	0.289172
A0A3Q1MPB8	0.283221
Q9TTE1	0.281265
A0A3Q1NIE5	0.281265
P21327	0.275476
Q28194	0.273573
A0A3Q1LGY9	0.271684
F2Z4I6	0.262429
Q5E9F8	0.255253
P01045	0.255253
A5PKM0	0.251739
P79342	0.248273
P02081	0.239816
A4FV61	0.238159
P20000	0.234881
G3MY00	0.22688
A0A3Q1MBE1	0.22688
F1MTN1	0.223756
F1MF78	0.222211
F5XVA9	0.220676
Q8HYY3	0.217638
Q0IIJ2	0.214641
A0A3Q1LTA5	0.20733
Q2YDK4	0.205898
Q29448	0.20166
F1MWU9	0.192109
F1MJH1	0.192109
A0A3Q1M2B2	0.188156
A2VDS1	0.186856
Q58D62	0.183011
I7CT57	0.181747
A8E4P3	0.174343
F1MW44	0.173139
Q95121	0.169576
F1MMU4	0.168404
F1MKN2	0.160428
A0A3Q1LX72	0.157127
P81644	0.15283
A6QLZ0	0.151774
Q58CY2	0.151774
Q28178	0.14161
J9QDU2	0.125869
B6VAP8	0.124137
G5E5A8	0.123279
A0A452DI66	0.121582
A0A140T897	0.11744
P34955	0.111105
E1BJK2	0.107321
P01966	0.101532
E1BB32	0.10083
P15497	0.0940779
E1BI56	0.0915054
A0A3Q1M211	0.0902456
P12763	0.0877778
Q3ZBX9	0.0859714
A0A3Q1MSW2	0.0785633
A0A3Q1MRM2	0.0743254
D4QBB4	0.0708052
F1N3A1	0.0612138
F6QND5	0.0587202
F1MD83	0.0579118
Q3SZZ9	0.0555527
F1MAV0	0.0544094

## Sheet: Suppl. Table S4
Upstream regulator	Molecular	Predicted	Activation	P-value of overlap	Number of targeted molecules in Dataset
	Type	Activation state	Z score
CD3	complex	Activated	2.652	1.6e-14	41
CD28	Transmembrane receptor	Activated	3.153	9.58e-15	31
IL-1	cytokine	Activated	2.299	4.44e-05	17
IL-2	cytokine	Activated	2.715	1.02e-07	30
IL-4	cytokine	Activated	2.678	2.35e-14	56
IL-7	cytokine	Activated	2.012	2.11e-05	11
IL-33	cytokine	Activated	2.559	5.85e-05	17

## Sheet: Suppl. Table S5
Accession	Abundance Ratio: (IL4) / (TH2)
A4IFU5	1.71713
P02768-1	7.01285
F2Z4I6	2.28153
Q1RMI4	1.56917
F1MDU7	1.6245
A0JN43	1.56917
P15636	1.72907
Q6B855	2.49666
Q2KJJ4	1.87905
P04264	6.06287
F1MSB7	0.423373
A6H7F8	1.51572
Q5KR49	1.68179
P40673	1.55833
P13645	5.65685
Q28178	0.632878
Q2LDY9	1.51572
P35908	4.05584
A0A3Q1MKK7	1.53688
Q3SX31	1.64718
E1BI70	1.53688
A4IFC8	1.70527
A6QPT3	1.76541
Q3YJF4	1.72907
A0A3Q1LM31	1.69349
Q32PJ5	2.15846
O46722	1.54756
E1BI58	1.6358
W5XHU3	2.39496
Q3YJH0	1.58008
P02538	1.77769
G3N0V2	6.9644
A5PK33	0.5
Q2KIV6	1.72907
P35527	4.34694
P13647	2.78949
F1MMB8	1.50525
F5XVA9	1.58008
A6QNZ7	2.9897
Q3B7M9	1.56917
A0A3Q1LMV9	2.07053
P53712	1.50525
A0A3Q1LTU7	0.641713
F1MWQ2	1.95884
Q56JY1	1.65864
E1BG91	1.56917
O46415	1.77769
P81425	1.59107
A5PKJ5	1.70527
A0A3Q1LMV3	1.71713
Q864L6	0.619854
Q17QJ1	1.53688
F1MMC7	1.50525
A0A3Q1MJD6	1.58008
Q24K13	1.64718
Q9TU26	0.63728
F1N7C5	1.91853
F1MB18	0.460094
A0A3Q1LTA5	1.49485
P02533	2.11404
A0A3Q1M9Z8	0.496546
A0A3Q1M902	1.6245
P46195	1.50525
F1MBF6	5.89708
O97919	0.123279
A0A3Q1LWS9	1.59107
A2VDN9	1.53688
Q9N179	1.51572
A2VDV2	1.56917
F1MJ35	1.61328
A0A3Q1MYF8	1.65864
Q0P5F2	1.56917
A0A3Q1MG78	0.641713
Q3ZBS7	1.67018
E1B8S2	1.58008
Q2TBU0	5.16941
P62276	1.64718
G3N251	0.659754
A0A3Q1MIW0	0.619854
Q3MHZ8	1.70527
P00430	1.61328
F1MZW1	1.55833
A0A1Y1C3L1	0.628507
A0A3Q1M5M9	1.53688
A6H7D3	7.4127
A0A3Q1MUB7	1.55833
Q1JP79	1.81504
A2VDV6	2.15846
A6QPX8	0.479632
Q3T0B0	2.80889
Q0VD29	1.6358
A2VDS1	1.75321
A0A3Q1NBH0	1.68179
P05632	1.70527
Q3T0E0	0.628507
A0A452DI18	1.55833
A0A3Q1MB94	2.01391
Q17QE5	1.91853
Q0VBZ5	0.628507
A0A3Q1MDC3	1.84038
A0A140T8C4	2
Q5E9B2	1.56917
P00130	1.49485
G3MX70	1.58008
E1BMI8	0.655197
F6QYT8	1.59107
A4IFM5	2.02792
Q2KJB1	1.98618
A5PKM0	1.87905
P45478	1.58008
A0A3Q1MVX9	1.61328
E1BKS1	0.624165
Q0V889	1.67018
Q9TT94	0.659754
A0A3S5ZPS0	0.524858
Q6J1J1	1.50525
P81644	1.55833
A6QNX3	1.60214
O18956	0.628507
F1MF78	1.54756
F6QX85	1.6245
E1BH40	1.6245
A0A3Q1LU54	1.53688
Q2KJ97	3.16017
Q2HJF1	1.6245
G3MYR9	1.61328
A6QNY4	0.646176
Q32PC9	1.61328
E1B8W1	1.6245
A0A3Q1MAR8	1.54756
Q148I3	1.82766
Q0VC97	0.619854
Q2KHW2	0.493116
G3N1U1	1.58008
A7E380	2.17347
Q28090	0.5
A6H7B3	1.53688
Q9TTE1	1.58008
A0A3Q1MJ54	3.31728
A0A3Q1MBY2	1.72907
P19035	1.53688
A0A3Q1MB48	1.85318
A0A3Q1LRP7	1.72907
F1MVZ6	1.70527
A0A3Q1N125	1.56917
A0A3Q1N9Y0	0.632878
G3N0D9	1.64718
Q2KIM0	1.67018
Q5J7T6	4.40762
Q17QA1	0.203063
Q32PI6	1.6358
F1MSF3	1.67018
A0A3Q1N6T2	1.53688
E1BPU0	1.64718
A0A3Q1M4M3	0.668964
A0A3Q1N607	2.01391
O19135	0.420448
J9QDU2	2.08493
F1MQ56	2.37841
A0A3Q1M1I6	1.64718
A5PKJ9	1.85318
G3N3R5	0.447513
Q2HJ52	1.87905
Q1JQC5	1.72907
Q3SZ27	1.6245
A0A3Q1NAR5	1.67018
E1BN61	1.72907
Q29S16	0.624165
Q32LK2	0.570382
F1MXY2	1.60214
A0A3Q1MRM2	1.51572
A8E4P3	1.98618
E1BJX8	2.9897
A6QPB2	0.650671
Q3SZY3	2.32947

## Sheet: Suppl. Table S6
ID	Genes in dataset	Prediction (based on measurement direction)	Expr Fold Change	Findings
G3N0V2	KRT1	Affected	6.964	Regulates
P13645	KRT10	Affected	5.657	Regulates
Q2TBU0	HP	Activated	5.169	Upregulates
J9QDU2	POSTN	Activated	2.085	Upregulates
F1N7C5	IDO1	Affected	1.919	Regulates
A0A3Q1MYF8	VPS13C	Activated	1.659	Upregulates
Q0P5F2	PSMG1	Activated	1.569	Upregulates
E1BG91	GIMAP1-GIMAP5	Activated	1.569	Upregulates
A6H7F8	MCM5	Affected	1.516	Regulates
Q6J1J1	BIRC5	Activated	1.505	Upregulates
P53712	ITGB1	Activated	1.505	Upregulates
Q9TU26	SLC7A5	Inhibited	-1.569	Upregulates
Q0VBZ5	JUNB	Inhibited	-1.591	Upregulates
A0A3S5ZPS0	IL2RA	Inhibited	-1.905	Upregulates
Q28090	CTLA4	Inhibited	-2	Upregulates
A5PK33	GZMA	Inhibited	-2	Upregulates
A0A3Q1M9Z8	PRF1	Activated	-2.014	Downregulates
Q2KHW2	CD83	Inhibited	-2.028	Upregulates
Q17QA1	CCL4	Inhibited	-4.925	Upregulates
O97919	CCL5	Activated	-8.112	Downregulates

## Sheet: Suppl. Table S7
Upstream regulator	Molecule type	Activation z score	Activation state	P-value of overlap
IL2	cytokine	-1.851	-	0.000719
IL12A	cytokine	-	-	0.0335
IL4	cytokine	0.219	-	3.01e-05

## Sheet: Suppl. Table S8
Accession	Abundance Ratio: (Pathogen) / (TH2)
A0A3Q1NE82	1.55833
Q3ZBU7	0.628507
E1B9F6	0.532185
Q1RMI4	1.54756
A0A3Q1MPB8	0.615572
Q6B855	1.8025
P04264	1.76541
F6QQ96	0.655197
F1MSB7	0.61132
F1N5H8	1.6358
P13645	1.50525
A0A3Q1MQ59	0.63728
E1BI58	1.53688
G3N0V2	1.97247
A5PK33	0.503478
P35527	1.70527
A0A3Q1M6Y5	1.6358
A7MBB7	0.574349
Q8MHP0	0.624165
A0A3Q1M9Z8	0.615572
O97919	0.129408
Q0VCH9	1.50525
A5PKD6	1.6358
G3X6L5	0.535887
A0A3Q1MEG8	0.598739
Q0VCQ8	0.543367
A0A3Q1M537	0.578344
A0A1Y1C3L1	0.48971
A6H7D3	1.93187
G3MZ54	0.524858
A0A3Q1LK48	0.664343
P27674	0.535887
Q17QE5	1.65864
Q6JXL2	1.52626
F1MYX8	0.632878
E1BMI8	0.547147
Q2KJB1	1.7411
A0A3S5ZPS0	0.646176
O18956	0.615572
A0A3Q1LQC4	0.615572
Q2KJ97	1.49485
Q3ZBV0	0.655197
Q2KJA5	0.641713
A0A3Q1MRT6	0.619854
Q2TBX4	0.668964
E1BH39	0.641713
Q2KHW2	0.5
A2VDN0	0.619854
F1MLL8	1.55833
Q0P5D3	0.646176
P37359	2.63902
Q28090	0.463294
G5E525	0.582367
Q2HJG7	1.59107
D6C4M7	0.659754
A0A3Q1M9H4	0.63728
A0A3Q1LN34	1.56917
M5FI44	1.55833
A0A3Q1N9Y0	0.624165
A0A3Q1M4K2	0.624165
F1MYN9	0.574349
E1BKQ2	0.650671
Q17QA1	0.217638
A0A3Q1LJV9	0.668964
A0A3Q1LX60	0.632878
A0A3Q1M4M3	0.403321
A0A3Q1N607	1.50525
O19135	0.336808
A0A3Q1MCW9	1.71713
Q4JH16	0.646176
A0A3Q1LTV0	1.60214
F1MQ56	1.87905
E1BKM9	1.87905
G3N3R5	0.438303
Q2TBU8	2.07053
A6QQC2	1.64718
Q2HJ52	1.55833
E1BN61	1.65864
Q29S16	0.532185
E1BEQ0	0.650671
Q5EA61	1.55833
E1BJX8	2.31338
A0A0N4STM9	0.650671

## Sheet: Suppl. Table S9
Upstream regulator	Predicted activation/inhibition	Z score	P value of overlap	Target molecule in dataset
CD3	inhibited	-3.247	6.42e-08	13
CD28	inhibited	-2.579	0.000111	7
CD40	inhibited	-2.598	8.43e-11	11
IL2	inhibited	-2.37	8.05e-11	16
IL7	inhibited	-2.194	9.34e-05	5
IL15	inhibited	-2.156	1.23e-07	11
NFϏB1	inhibited	-2.415	3.39e-06	8
